# Supplementary material
Source: PubMed Central journal article supplement (PMC6205509)
Supplement: NIHMS853429-supplement-1.pdf [file NIHMS853429-supplement-1.pdf]

## Supplementary Data A

**Table 1**  
ChildCARE child/peer group intervention session content.<sup>1</sup>

| Session | Title                              | Content                                                                                                                                                                                 |
|---------|------------------------------------|-----------------------------------------------------------------------------------------------------------------------------------------------------------------------------------------|
| 1       | A Colorful Life                    | Introduction and program overview; Establish rapport; Set child-directed resilience goals                                                                                               |
| 2       | Positive Swordsmen                 | Understand links between cognitions, emotions, and behavior; Introduce and practice strategies for positive reframing                                                                   |
| 3       | Master of Emotions                 | Learn to identify emotions; Understand how emotions affect behavior; Introduce and practice strategies to manage emotions                                                               |
| 4       | Assertive Communications           | Examine various communication patterns; Learn and practice steps for assertive communication in school and peer settings                                                                |
| 5       | Connections with Love              | Review four steps of assertive communication; Learn and practice assertive communication within home settings (i.e., caregivers, siblings)                                              |
| 6       | My Support Circle                  | Identify resources for social support; Increase ability to request support from others; Learn strategies to support peers and family members                                            |
| 7       | Problem Solving                    | Identify positive coping strategies; Review and practice cognitive, emotional, and behavioral skills learned in previous sessions                                                       |
| 8       | The Sunshine comes after the Storm | Recognize that challenges are inevitable; Understand connections between stress-feelings-thoughts-behaviors; Review emotional regulation strategies to use during stressful events      |
| 9       | My Future is not just a Dream      | Identify strengths in self and peers; Increase peer support; Promote positive self-esteem and future orientation                                                                        |
| 10      | Let the Love Shine                 | Integrate concepts and skills learned in previous nine sessions; Recognize importance of individual and peer support to overcome future challenges; Review progress on resilience goals |

<sup>1</sup>Session titles and content translated from original Mandarin.

**Table 2**ChildCARE caregiver intervention session content.<sup>1</sup>

| <b>Session</b> | <b>Title</b>                                           | <b>Theme</b>                                   | <b>Content</b>                                                                                                                                                                        |
|----------------|--------------------------------------------------------|------------------------------------------------|---------------------------------------------------------------------------------------------------------------------------------------------------------------------------------------|
| 1              | Wheat Needs Air;<br>Kids need Love                     | Caregiver Role in<br>Children's<br>Development | Introduction and program overview; Establish rapport; Recognize role of caregiver in children's development and response to adversity; Identify caregiver and child strengths         |
| 2              | Wheat Needs<br>Fertilizer; Kids Need<br>Education      | Parenting skills                               | Identify common reasons for various problem behaviors in childhood; Learn effective parenting skills to deal with problem behaviors                                                   |
| 3              | Wheat Needs<br>Irrigation; Kids Need<br>Communication  | Communication skills                           | Recognize important role of communication within a family; Learn and practice effective caregiver-child communication skills                                                          |
| 4              | Wheat Needs<br>Sunshine; Kids Need<br>Appreciation     | Positive expectations                          | Recognize children's need for praise and encouragement; Learn and practice ways to communicate appreciation, encouragement, and positive future expectations to children              |
| 5              | Being a Healthy and<br>Happy Parent of<br>Wheat (Kids) | Parental self-care and<br>social support       | Review content from previous four sessions; Identify importance of caregiver self-care and social support; Learn and practice strategies to self-care and to seek and receive support |

<sup>1</sup>Session titles and content translated from original Mandarin.

## Supplementary Data B

**Table 1.**

ChildCARE Child/Peer group Intervention Session Content Behavior Change Technique (BCT) Taxonomy Coding.

| Session | Title                    | Content <sup>1</sup>                                                                                                      | BCT Taxonomy Code <sup>2</sup>                                                                                                                                                                                                                                                                             |
|---------|--------------------------|---------------------------------------------------------------------------------------------------------------------------|------------------------------------------------------------------------------------------------------------------------------------------------------------------------------------------------------------------------------------------------------------------------------------------------------------|
| 1       | A Colorful Life          | Introduction and program overview; Establish rapport; Set child-directed resilience goals                                 | 1. Goals and planning<br>1.1 Goal setting (behavior)<br>1.2 Problem Solving<br>1.3 Goal setting (outcome)<br>3 Social support<br>3.1 Social support (unspecified)                                                                                                                                          |
| 2       | Positive Swordsmen       | Understand links between cognitions, emotions, and behavior; Introduce and practice strategies for positive reframing     | 4. Shaping knowledge<br>4.1 Instruction on how to perform a behavior<br>6. Comparison of behavior<br>6.1 Demonstration of the behavior<br>8. Repetition and substitution<br>8.1 Behavioral practice/rehearsal<br>11. Regulation<br>11.2 Reduce negative emotions<br>13. Identity<br>13.2 Framing/reframing |
| 3       | Master of Emotions       | Learn to identify emotions; Understand how emotions affect behavior; Introduce and practice strategies to manage emotions | 4. Shaping knowledge<br>4.1 Instruction on how to perform a behavior<br>6. Comparison of behavior<br>6.1 Demonstration of the behavior<br>8. Repetition and substitution<br>8.1 Behavioral practice/rehearsal<br>11. Regulation<br>11.2 Reduce negative emotions                                           |
| 4       | Assertive Communications | Examine various communication patterns; Learn and practice steps for assertive communication in school and peer settings  | 4. Shaping knowledge<br>4.1 Instruction on how to perform a behavior<br>6. Comparison of behavior<br>6.1 Demonstration of the behavior<br>8. Repetition and substitution<br>8.1 Behavioral practice/rehearsal                                                                                              |

|   |                                    |                                                                                                                                                                                                 |                                                                                                                                                                                                                                                                                                                                                                                                                                                                                                                                                                                                                                      |
|---|------------------------------------|-------------------------------------------------------------------------------------------------------------------------------------------------------------------------------------------------|--------------------------------------------------------------------------------------------------------------------------------------------------------------------------------------------------------------------------------------------------------------------------------------------------------------------------------------------------------------------------------------------------------------------------------------------------------------------------------------------------------------------------------------------------------------------------------------------------------------------------------------|
| 5 | Connections with Love              | Review four steps of assertive communication; Learn and practice assertive communication within home settings (i.e., caregivers, siblings)                                                      | <ul style="list-style-type: none"> <li>4. Shaping knowledge <ul style="list-style-type: none"> <li>4.1 Instruction on how to perform a behavior</li> </ul> </li> <li>6. Comparison of behavior <ul style="list-style-type: none"> <li>6.1 Demonstration of the behavior</li> </ul> </li> <li>8. Repetition and substitution <ul style="list-style-type: none"> <li>8.1 Behavioral practice/rehearsal</li> </ul> </li> </ul>                                                                                                                                                                                                          |
| 6 | My Support Circle                  | Identify resources for social support; Increase ability to request support from others; Learn strategies to support peers and family members                                                    | <ul style="list-style-type: none"> <li>3. Social support <ul style="list-style-type: none"> <li>3.2 Social support (practical)</li> <li>3.3 Social support (emotional)</li> </ul> </li> <li>4. Shaping knowledge <ul style="list-style-type: none"> <li>4.1 Instruction on how to perform a behavior</li> </ul> </li> <li>6. Comparison of behavior <ul style="list-style-type: none"> <li>6.1 Demonstration of the behavior</li> </ul> </li> <li>8. Repetition and substitution <ul style="list-style-type: none"> <li>8.1 Behavioral practice/rehearsal</li> </ul> </li> </ul>                                                     |
| 7 | Problem Solving                    | Identify positive coping strategies; Review and practice cognitive, emotional, and behavioral skills learned in previous sessions                                                               | <ul style="list-style-type: none"> <li>4. Shaping knowledge <ul style="list-style-type: none"> <li>4.1 Instruction on how to perform a behavior</li> </ul> </li> <li>6. Comparison of behavior <ul style="list-style-type: none"> <li>6.1 Demonstration of the behavior</li> </ul> </li> <li>8. Repetition and substitution <ul style="list-style-type: none"> <li>8.1 Behavioral practice/rehearsal</li> </ul> </li> <li>11. Regulation <ul style="list-style-type: none"> <li>11.2 Reduce negative emotions</li> </ul> </li> <li>13. Identity <ul style="list-style-type: none"> <li>13.2 Framing/reframing</li> </ul> </li> </ul> |
| 8 | The Sunshine comes after the Storm | Recognize that challenges are inevitable; Understand connections between stress-feelings-thoughts-behaviors; Review and practice emotional regulation strategies to use during stressful events | <ul style="list-style-type: none"> <li>4. Shaping knowledge <ul style="list-style-type: none"> <li>4.1 Instruction on how to perform a behavior</li> </ul> </li> <li>6. Comparison of behavior <ul style="list-style-type: none"> <li>6.1 Demonstration of the behavior</li> </ul> </li> <li>8. Repetition and substitution <ul style="list-style-type: none"> <li>8.1 Behavioral practice/rehearsal</li> </ul> </li> <li>11. Regulation <ul style="list-style-type: none"> <li>11.2 Reduce negative emotions</li> </ul> </li> </ul>                                                                                                 |

|    |                               |                                                                                                                                                                                         |                                                                                                                                                                                                                                                                                                                                                                                                                                                                                                                                                                                                                                                                                                                                                                                                                                            |
|----|-------------------------------|-----------------------------------------------------------------------------------------------------------------------------------------------------------------------------------------|--------------------------------------------------------------------------------------------------------------------------------------------------------------------------------------------------------------------------------------------------------------------------------------------------------------------------------------------------------------------------------------------------------------------------------------------------------------------------------------------------------------------------------------------------------------------------------------------------------------------------------------------------------------------------------------------------------------------------------------------------------------------------------------------------------------------------------------------|
| 9  | My Future is not just a Dream | Identify strengths in self and peers; Increase peer support; Promote positive self-esteem and future orientation                                                                        | <ul style="list-style-type: none"> <li>3. Social support <ul style="list-style-type: none"> <li>3.2 Social support (practical)</li> <li>3.3 Social support (emotional)</li> </ul> </li> <li>13. Identity <ul style="list-style-type: none"> <li>13.1 Identification of self as role model</li> <li>13.4 Valued self-identity</li> </ul> </li> <li>15. Self-belief <ul style="list-style-type: none"> <li>15.1 Verbal persuasion about capability</li> </ul> </li> </ul>                                                                                                                                                                                                                                                                                                                                                                    |
| 10 | Let the Love Shine            | Integrate concepts and skills learned in previous nine sessions; Recognize importance of individual and peer support to overcome future challenges; Review progress on resilience goals | <ul style="list-style-type: none"> <li>1. Goals and planning <ul style="list-style-type: none"> <li>1.7 Review outcome goal(s)</li> </ul> </li> <li>3. Social support <ul style="list-style-type: none"> <li>3.2 Social support (practical)</li> <li>3.3 Social support (emotional)</li> </ul> </li> <li>4. Shaping knowledge <ul style="list-style-type: none"> <li>4.1 Instruction on how to perform a behavior</li> </ul> </li> <li>6. Comparison of behavior <ul style="list-style-type: none"> <li>6.1 Demonstration of the behavior</li> </ul> </li> <li>13. Identity <ul style="list-style-type: none"> <li>13.1 Identification of self as role model</li> <li>13.4 Valued self-identity</li> </ul> </li> <li>15. Self-belief <ul style="list-style-type: none"> <li>15.1 Verbal persuasion about capability</li> </ul> </li> </ul> |

---

<sup>1</sup>Session titles and content translated from original Mandarin.

<sup>2</sup>From Michie, S., Richardson, M., Abraham, C., Francis, J., Hardeman, W., Eccles, M.P., et al. (2013). The behavior change technique taxonomy (v1) of 93 hierarchically clustered techniques: Building an international consensus for the reporting of behavior change interventions. *Annals of Behavioral Medicine*, 46, 81-95.

**Table 2.**

ChildCARE Caregiver Intervention Session Content Behavior Change Technique (BCT) Taxonomy Coding.

| <b>Session</b> | <b>Title</b>                                    | <b>Theme</b>                             | <b>Content<sup>1</sup></b>                                                                                                                                                    | <b>BCT Taxonomy Code(s)<sup>2</sup></b>                                                                                                                                                                       |
|----------------|-------------------------------------------------|------------------------------------------|-------------------------------------------------------------------------------------------------------------------------------------------------------------------------------|---------------------------------------------------------------------------------------------------------------------------------------------------------------------------------------------------------------|
| 1              | Wheat Needs Air; Kids need Love                 | Caregiver Role in Children's Development | Introduction and program overview; Establish rapport; Recognize role of caregiver in children's development and response to adversity; Identify caregiver and child strengths | 13. Identity<br>13.1 Identification of self as role model<br>13.4 Valued self-identity<br>15. Self-belief<br>15.1 Verbal persuasion about capability<br>15.3 Focus on past success                            |
| 2              | Wheat Needs Fertilizer; Kids Need Education     | Parenting skills                         | Identify common reasons for various problem behaviors in childhood; Learn effective parenting skills to deal with problem behaviors                                           | 4. Shaping knowledge<br>4.1 Instruction on how to perform a behavior<br>6. Comparison of behavior<br>6.1 Demonstration of the behavior<br>8. Repetition and substitution<br>8.1 Behavioral practice/rehearsal |
| 3              | Wheat Needs Irrigation; Kids Need Communication | Communication skills                     | Recognize important role of communication within a family; Learn and practice effective caregiver-child communication skills                                                  | 4. Shaping knowledge<br>4.1 Instruction on how to perform a behavior<br>6. Comparison of behavior<br>6.1 Demonstration of the behavior<br>8. Repetition and substitution<br>8.1 Behavioral practice/rehearsal |
| 4              | Wheat Needs Sunshine; Kids Need Appreciation    | Positive expectations                    | Recognize children's need for praise and encouragement; Learn and practice ways to communicate appreciation, encouragement, and positive future expectations to children      | 4. Shaping knowledge<br>4.1 Instruction on how to perform a behavior<br>6. Comparison of behavior<br>6.1 Demonstration of the behavior<br>8. Repetition and substitution<br>8.1 Behavioral practice/rehearsal |

|   |                                                  |                                       |                                                                                                                                                                                       |                                                                                                                                                                                                                                                                                                                                                                                                                                                                                                                                                                                  |
|---|--------------------------------------------------|---------------------------------------|---------------------------------------------------------------------------------------------------------------------------------------------------------------------------------------|----------------------------------------------------------------------------------------------------------------------------------------------------------------------------------------------------------------------------------------------------------------------------------------------------------------------------------------------------------------------------------------------------------------------------------------------------------------------------------------------------------------------------------------------------------------------------------|
| 5 | Being a Healthy and Happy Parent of Wheat (Kids) | Parental self-care and social support | Review content from previous four sessions; Identify importance of caregiver self-care and social support; Learn and practice strategies to self-care and to seek and receive support | <ul style="list-style-type: none"> <li>3. Social support <ul style="list-style-type: none"> <li>3.2 Social support (practical)</li> <li>3.3 Social support (emotional)</li> </ul> </li> <li>4. Shaping knowledge <ul style="list-style-type: none"> <li>4.1 Instruction on how to perform a behavior</li> </ul> </li> <li>6. Comparison of behavior <ul style="list-style-type: none"> <li>6.1 Demonstration of the behavior</li> </ul> </li> <li>8. Repetition and substitution <ul style="list-style-type: none"> <li>8.1 Behavioral practice/rehearsal</li> </ul> </li> </ul> |
|---|--------------------------------------------------|---------------------------------------|---------------------------------------------------------------------------------------------------------------------------------------------------------------------------------------|----------------------------------------------------------------------------------------------------------------------------------------------------------------------------------------------------------------------------------------------------------------------------------------------------------------------------------------------------------------------------------------------------------------------------------------------------------------------------------------------------------------------------------------------------------------------------------|

---

<sup>1</sup>Session titles and content translated from original Mandarin.

<sup>2</sup>From Michie, S., Richardson, M., Abraham, C., Francis, J., Hardeman, W., Eccles, M.P., et al. (2013). The behavior change technique taxonomy (v1) of 93 hierarchically clustered techniques: Building an international consensus for the reporting of behavior change interventions. *Annals of Behavioral Medicine*, 46, 81-95.

# 儿童心理弹性项目

## 儿童团体干预

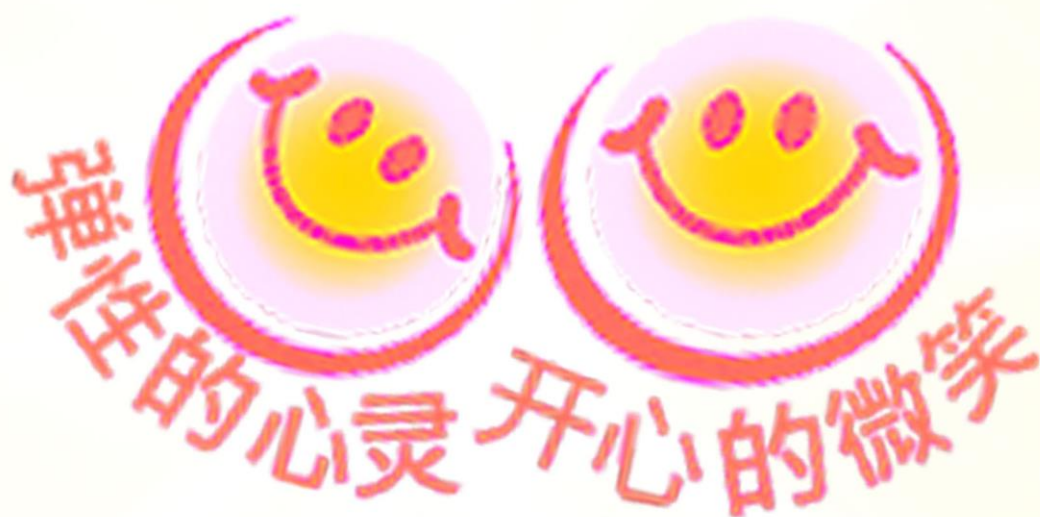

## 干预培训手册

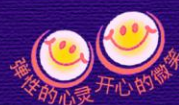

河南大学中美国际合作研究课题制作



项目培训内部资料，请注意保密！

# 儿童团体心理辅导员训练手册

儿童心理弹性干预项目组编写

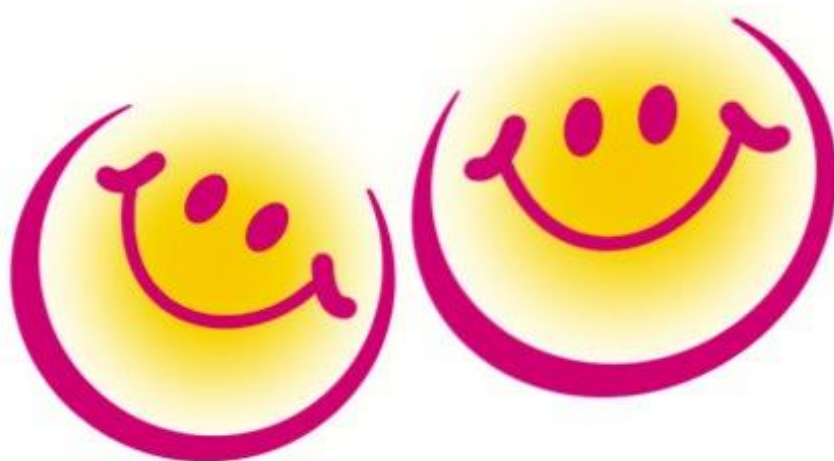

弹性的心灵，开心的微笑

培训日期：2012年9月

培训地点：河南大学

团体辅导员姓名：\_\_\_\_\_

# 目录

|                                 |    |
|---------------------------------|----|
| 目录 .....                        | 4  |
| 写在前面的话 .....                    | 8  |
| 什么是心理弹性? .....                  | 8  |
| 如何使用本手册? .....                  | 9  |
| 第一次活动 七彩生活 .....                | 10 |
| 主题口号 .....                      | 10 |
| 活动理念 .....                      | 10 |
| 活动目标 .....                      | 10 |
| 活动流程 .....                      | 10 |
| 所需材料 .....                      | 11 |
| 活动方案 .....                      | 11 |
| 一、建立关系 (15 分钟) .....            | 11 |
| 二、小组规范 (30 分钟) .....            | 12 |
| 三、主题活动《七彩生活》(30 分钟) .....       | 13 |
| 四、总结和介绍组员日记本 (15 分钟) .....      | 14 |
| 组员日记本 1-1: 组歌——心理弹性之歌 .....     | 16 |
| 组员日记本 1-2: 我的心灵小屋 .....         | 17 |
| 组员日记本 1-3: 《七彩生活》画布 .....       | 18 |
| 组员日记本 1-5: 组员印花单 .....          | 20 |
| 附件 1.1 小组规则海报 .....             | 21 |
| 第二次活动 积极剑客 .....                | 22 |
| 主题口号 .....                      | 22 |
| 活动理念 .....                      | 22 |
| 活动目标 .....                      | 22 |
| 活动流程 .....                      | 22 |
| 所需材料 .....                      | 23 |
| 活动方案 .....                      | 23 |
| 一、回顾与热身 (15 分钟) .....           | 23 |
| 二、主题活动:《积极的小新》(30 分钟) .....     | 24 |
| 三、主题活动:《积极三剑客》(40 分钟) .....     | 25 |
| 四、总结与心理弹性练习布置 (15 分钟) .....     | 27 |
| 组员日记本 2-1 《积极剑客-拯救小猪村活动》 .....  | 28 |
| 组员日记本 2-2 心理弹性练习第二次《积极剑客》 ..... | 30 |
| 第三次活动 情绪高手 .....                | 31 |
| 主题口号 .....                      | 31 |
| 活动理念 .....                      | 31 |

|                                     |    |
|-------------------------------------|----|
| 活动目标 .....                          | 31 |
| 活动流程 .....                          | 31 |
| 所需材料 .....                          | 32 |
| 活动方案 .....                          | 32 |
| 一、回顾与热身（15分钟） .....                 | 32 |
| 二、主题活动《情绪高手》（30分钟） .....            | 33 |
| 三、主题活动《情绪高手论压力》（30分钟） .....         | 34 |
| 四、总结与心理弹性练习布置（15分钟） .....           | 35 |
| 组员日记本 3-1《情绪高手论压力》 .....            | 36 |
| 组员日记本 3-2 心理弹性练习第三次《我的感觉》 .....     | 37 |
| 第四次活动 沟通小能手 .....                   | 38 |
| 主题口号 .....                          | 38 |
| 活动理念 .....                          | 38 |
| 活动目标 .....                          | 38 |
| 活动流程 .....                          | 38 |
| 所需材料 .....                          | 39 |
| 活动方案 .....                          | 39 |
| 一、回顾与热身（15分钟） .....                 | 39 |
| 二、主题活动《自信沟通四部曲》（30分钟） .....         | 40 |
| 三、主题活动《我是沟通小能手》（30分钟） .....         | 42 |
| 四、总结和任务布置（15分钟） .....               | 42 |
| 附件 4-1《我是沟通小能手》活动活页（组长需打印） .....    | 43 |
| 组员日记本 4-1 心理弹性练习第四次《我的选择》 .....     | 44 |
| 第五次 爱的连结 .....                      | 45 |
| 主题口号 .....                          | 45 |
| 活动理念 .....                          | 45 |
| 活动目标 .....                          | 45 |
| 活动流程 .....                          | 45 |
| 所需材料 .....                          | 46 |
| 活动方案 .....                          | 46 |
| 一、回顾与热身（15分钟） .....                 | 46 |
| 二、主题活动《爱的沟通》（30分钟） .....            | 46 |
| 三、主题活动《我爱我的家人》（30分钟） .....          | 47 |
| 四、总结和任务布置（15分钟） .....               | 48 |
| 组员日记本 5-1 心理弹性练习第六次《写给父母的一封信》 ..... | 49 |
| 第六次 我的支持环 .....                     | 50 |
| 主题口号 .....                          | 50 |
| 活动理念 .....                          | 50 |
| 活动目标 .....                          | 50 |
| 活动流程 .....                          | 50 |

|                                                |    |
|------------------------------------------------|----|
| 所需材料 .....                                     | 51 |
| 活动方案 .....                                     | 51 |
| 一、回顾及热身（15分钟） .....                            | 51 |
| 二、主题活动《爱是可以传递的》（30分钟） .....                    | 51 |
| 三、主题活动《我的支持环》（30分钟） .....                      | 52 |
| 四、总结与任务布置（15分钟） .....                          | 54 |
| 组员日记本 6-1 爱是可以传递的 .....                        | 55 |
| 组员日记本 6-2 我的支持环 .....                          | 56 |
| 组员日记本 6-3: 心理弹性练习第六次《我的资源森林》 .....             | 57 |
| 第七次活动 问题解决秘籍会 .....                            | 58 |
| 主题口号 .....                                     | 58 |
| 活动理念 .....                                     | 58 |
| 活动目标 .....                                     | 58 |
| 活动流程 .....                                     | 58 |
| 所需材料 .....                                     | 59 |
| 活动方案 .....                                     | 59 |
| 一、回顾及热身（15分钟） .....                            | 59 |
| 二、主题活动《问题解决秘籍环》（30分钟） .....                    | 59 |
| 三、主题活动《问题解决秘籍会》（30分钟） .....                    | 61 |
| 四、总结与任务布置（15分钟） .....                          | 61 |
| 附件 7.1 主题活动活页《问题解决秘籍录》 .....                   | 63 |
| 组员日记本 7-1 问题解决英雄录 .....                        | 64 |
| 第八次活动 阳光总在风雨后 .....                            | 65 |
| 主题口号 .....                                     | 65 |
| 活动理念 .....                                     | 65 |
| 活动目标 .....                                     | 65 |
| 活动流程 .....                                     | 65 |
| 休息一下 .....                                     | 65 |
| 10分钟 .....                                     | 65 |
| 所需材料 .....                                     | 66 |
| 活动方案 .....                                     | 66 |
| 一、热身与回顾（15分钟） .....                            | 66 |
| 二、主题活动《不折不挠-林书豪》（30分钟） .....                   | 67 |
| 三、主题活动《阳光总在风雨后》（30分钟） .....                    | 68 |
| 四、总结与任务布置（15分钟） .....                          | 69 |
| 附件 8.1 阳光卡和风雨卡制作样本 .....                       | 71 |
| 组员日记本 8-1 心理弹性练习第八次：阳光总在风雨后 <sup>2</sup> ..... | 72 |
| 第九次活动 我的未来不是梦 .....                            | 73 |
| 主题口号 .....                                     | 73 |
| 活动理念 .....                                     | 73 |

|                                    |     |
|------------------------------------|-----|
| 活动目标 .....                         | 73  |
| 活动流程 .....                         | 73  |
| 所需材料 .....                         | 74  |
| 活动方案 .....                         | 74  |
| 一、回顾与热身（15 分钟） .....               | 74  |
| 二、主题活动《神奇卡片》（30 分钟） .....          | 74  |
| 三、主题活动《我的未来不是梦》（30 分钟） .....       | 75  |
| 四、总结与任务布置（15 分钟） .....             | 76  |
| 组员日记本 9-1 主题活动《神奇卡片》 .....         | 77  |
| 组员日记本 9-2 心理弹性练习第九次《理想计划书》 .....   | 78  |
| 第十次活动 让爱发光 .....                   | 79  |
| 主题口号 .....                         | 79  |
| 活动理念 .....                         | 79  |
| 活动目标 .....                         | 79  |
| 活动流程 .....                         | 79  |
| 所需材料 .....                         | 80  |
| 活动方案 .....                         | 80  |
| 一、回顾与热身（15 分钟） .....               | 80  |
| 二、主题活动《我的心理弹性之旅》（30 分钟） .....      | 81  |
| 三、主题活动《父母报告会》（30 分钟） .....         | 82  |
| 组员日记本 10-1 心理弹性练习第十次《心理弹性之旅》 ..... | 83  |
| 组员日记本 10-2 父母报告会发言提纲 .....         | 84  |
| 附件 10.1 心理弹性小组活动结业证书 .....         | 85  |
| 附件 10-1 小组活动反馈表（组员用） .....         | 86  |
| 附录 1 活动过程评估表（组长用） .....            | 87  |
| 附录 2 活动实施忠诚度评估表（副组长用） .....        | 88  |
| 附录 3 儿童小组辅导的基本理念和技术 .....          | 99  |
| 一、小组辅导基本技能 .....                   | 99  |
| 二、哀伤情绪辅导 .....                     | 102 |
| 三、小组组长的常遇到的问题及处理 .....             | 104 |
| 参考文献 .....                         | 106 |

# 写在前面的话

## 什么是心理弹性？

心理弹性是指个体遭受重大的威胁，严重的逆境，或创伤时仍能获得积极适应的心理过程。儿童和青少年阶段是心理弹性形成的重要阶段，也是学习认知、情绪及社会技能的关键阶段。本方案旨在提高身处逆境的儿童的心理弹性。方案的主要理论基础是认知行为治疗（CBT）（e.g., Hollon, Derubeis & Seligman, 1992），系统沟通理论（e.g., Satir 家庭沟通理论，1967），和 SAMHSA 模式项目（PATHS, Second Step）

本方案的目标是通过提高以下能力提高儿童的心理弹性：

### **积极的态度、信念、归因(positive thinking, meaning making)**

- 想法-情绪、行为紧密相连
- 积极的想法会有积极的结果，消极想法会有消极结果
- 事物有两面，积极再定义，积极自我对话

### **情绪能力(emotional competence: knowledge, self-regulation )**

- 分辨各种情绪，以及各种情绪下的身体反应
- 了解情绪-行为紧密相连
- 学会调整自己的情绪

### **沟通能力 (social competence, communication)**

- 练习倾听、尊重，感受到倾听能够帮助自己与别人融洽相处 (listening with attention, respect)
- 能够在沟通中运用共情 (perspective taking, responding with compassion)
- 学会区分讨好的沟通、指责的沟通和自信的沟通
- 学会使用身体和语言自信的沟通
- 可以把自信沟通应用到实际生活中，如被欺负、被歧视、拒绝危险行为

### **寻求帮助的能力 (support seeking, support networking)**

- 认识自己的资源网络
- 了解遇到自己无法解决的困难时，到哪里，如何寻求解决

### **问题解决能力 (problem solving)**

- 练习综合所学的技能解决学习、人际、家庭问题
- 学习问题解决的步骤，认识到选择的重要性

### **积极乐观的未来希望 (positive future)**

- 积极面对生活中挑战 (problem solving: life transitions and changes)
- 灌注对未来的希望

## 自尊与自信(self-esteem and self-confidence)

- 了解个体的独特性及存在的价值
- 对自己有积极的看法
- 认识自我，并能坦诚的表达自我的看法和感受

## 如何使用本手册？

方案共包含 10 次主题活动，每次主题活动中包含两个小节，每个小节约 45 分钟。在方案执行过程中，安静不受干扰环境非常重要。干预的团体由 10 个 8-12 岁儿童组成。组长与助手在实施干预中需要承担以下责任：

- 1.接受心理弹性团体辅导技能培训
- 2.对所有活动过程烂熟于心
- 3.在同辈团体中演练过一次
- 4.在每次干预之前检查所有活动材料是否齐备
- 5.组长填写活动过程记录表（10 次）
- 6.助手填写活动忠诚表核查单（10 次）
- 7.收集儿童对整个干预活动的反馈（1 次）

手册包含两个部分

### 1.小组辅导员手册 + 活动 PPT + 活动视频

本手册详细记录了所有活动内容，指导语（斜体字）。活动材料需要组长与助手按照要求自行准备。

### 2.组员日记本

组员日记本包含了所有需要组员完成的干预材料、心理弹性练习。

# 第一次活动 七彩生活

## 主题口号

不开心很正常，我的开心我做主！

## 活动理念

本次活动主要内容是介绍心理弹性小组的活动内容和规范，促进组员的互动和分享，消除组员的陌生感，培养组员对小组的归属感，此外还通过主题活动促进组员分享自己生活中的积极与消极事件，为下一次情绪管理活动做铺垫。

## 活动目标

1. 小组介绍与建立关系
2. 形成小组动力，明确小组规则
3. 了解组员生活中的开心与不开心事件
4. 组员开始尝试设立心理弹性目标

## 活动流程

|              |                                                               |       |
|--------------|---------------------------------------------------------------|-------|
| 一、建立关系       | 1、打招呼<br>2、小组介绍<br>3、破冰游戏《循环沟通》                               | 10 分钟 |
| 二、小组规范       | 1、逐条举例介绍规范<br>2、承诺仪式<br>3、学习“爱的鼓励”<br>4、学习“最高品质静悄悄”<br>5、学唱组歌 | 35 分钟 |
|              | 休息一下                                                          | 10 分钟 |
| 四、主题活动《七彩生活》 | 1、引言故事《我的心灵小屋》<br>2、组员画七彩生活<br>3、组长带领组员分享自己作品<br>4、小组分享，组长总结  | 30 分钟 |



|               |                           |       |
|---------------|---------------------------|-------|
| 四、总结与布置心理弹性练习 | 1、介绍组员日记本及布置作业<br>2、唱组歌结束 | 15 分钟 |
|---------------|---------------------------|-------|

## 所需材料

1. PPT\_1, 笔记本电脑, 投影仪, 音箱, 印花贴纸, 水彩笔 10 套, 胶水、胶条
2. 组员日记本 10 本
3. 玩偶: 打不倒的灰太狼
4. 奖品五种 (价格由低到高)
5. 砖头贴纸 10 张 (贴纸内容如下)

**七彩生活**  
不开心很正常, 我的开心我做主!

6. 全开海报: 《小组规则》(附件 1.1) (每次小组活动都贴在墙上)
7. 组员日记本 (组长在以后几次活动中准备部分活页, 以防有的同学忘记带组员日记本)
  - 1-1 组歌
  - 1-2 我的心灵小屋
  - 1-3 《七彩生活》画布
  - 1-4 心理弹性练习第一次《我的目标》
  - 1-5 组员印花单

## 活动方案

### 一、建立关系 (15 分钟)

#### 1、打招呼 (活动前)

- 1) 站在房间的门口, 跟每一个组员打招呼, “你好/早上好, 我是\*\*\*老师!”, 微笑并跟组员握手。
- 2) 在每次小组会面时, 都要求组员能够和你有更长时间的眼神接触, 更加自信的和你打招呼。一个微笑、一声“你好”, 一个亲切的眼神都是给彼此留下好印象的重要部分。每一次小组开始时都练习这个部分。让这个技能成为孩子的习惯。为了帮助那些年纪小的孩子和比较害羞的组员, 可以用有趣的说法:

*这个门是我美丽城堡的护城河, 如果你没有找到合适的钥匙, 吊桥无法放下来让你通过。*

#### 2、小组介绍 (5 分钟)

- 1) 用类似下面的语言描述小组过程:

*小组老师介绍自己: 大家好, 我是\*\*\*老师, 很高兴能够到这里认识大家, 跟大家一起来进行我们美好的心理弹性之旅。欢迎你们来到心理弹性小组!*

什么是心理弹性呢？（搬出“不倒灰太狼”），大家都认识灰太狼吧？它每天都在努力地抓羊，但是从来没有成功过，红太狼还老骂它。但是它从来都不放弃，每次失败后都会大喊“我还会再回来的！”每天都信心满满地继续去抓羊。成了这只不倒的灰太狼，无论我怎么摆弄它，它都能回到原来的样子。这是因为它的内心很强大，不怕困难，而且始终相信总有一天会抓到羊。我们每个人的生活中，有时候可能也会遇到很多的困难和压力，但是我们只要我们的内心像灰太狼一样有足够的弹性，无论压力和困难多大，都能把困难“弹”回去。

我们这个小组的目的是帮助你像不倒的灰太狼一样，能够坚强乐观地面对生活中的各种挑战，交到好朋友、让你的生活更快乐。

### 3. 破冰游戏——循环沟通（10分钟）

刚才我做了自我介绍，也介绍了我们的心理弹性小组。接下来大家一起玩一个游戏，相互认识。游戏规则：所有学员围成内外两个圈，外圈和内圈的人数一样。听到音乐时内圈的人向和外圈分别向反方向转动，边动要边摆弄各种动作，音乐停下来时，外圈的人面向圆心，内圈的人面向外圈的人。这时外圈和内圈的人相互问好并自我介绍。“你好，我叫\*\*\*,我喜欢\*\*\*（一项自己的爱好，如唱歌）”。直到内外圈的人大部分相互认识则停止游戏。

**分享：**记得多少个人的名字？跟别人打招呼的时候有什么感受？

## 二、小组规范（30分钟）

### 1、举例介绍规则（10分钟）

组长把小组规则海报贴在墙上。清楚的解释每条规则的重要性，并举例说明。

### 2、承诺仪式（6分钟）

每位同学明白规则后，如果表示会遵守他，就一起跟着组长站在规则前宣誓，然后组长带领同学在海报上描出自己的手掌印，表示承诺遵守规则。

我们会一起度过10次很有意思很愉快的活动时光，而我们要玩的开心，就要遵守团体规则。我们现在开始就是一个互相帮助，互相支持的团队，为了自己，为了团队的每一个人，我们都要遵守规则，活动才能玩的开心，顺心，安心。这里是我为大家精心准备的规则大海报，我们一起把规则读出来好不好？大家觉得这些规则难不难呢？每一项都是很重要的，大家有没有异议的呢？看来大家都可以遵守啦，那咱们用一个动作来表示愿意遵守规则好吗？大家都举起我们的右手，咱们一起在这个海报上描出自己手的轮廓，说明我们都会遵守规则，一诺千金！

### 3、学习“爱的鼓励”拍手方式（2分钟）

我们活动中同学分享，除了要尊重同学要保持安静外，我们也要好好答谢分享同学的用心哦，对同学表达欣赏。那在每位同学分享后，我们都用一个有趣又整齐的方法回应他欣赏他好不好？咱们一起学习“爱的鼓励”！到现在为止，大家表现都非常好，让我们一起给每个人“爱的鼓励”。

### 4、学习“最高品质静悄悄”（2分钟）

有一个口号我们一定要记得哦，当我每一次说出口号前部分时，要看看谁可以最快答出下一句

哦！我们的口号就是“我们的最高品质是：静悄悄！”我会在活动中随时讲出这个口号哦，当我说“我们的最高品质是——”你们要答什么？“静悄悄！”对啦，大家都精神嘛，大家要记得哦，当我说口号大家一定要第一时间回答呀！

### 5、学唱组歌（10分钟）

助手分发组员日记本，播放《心理弹性之歌》伴奏。组长让孩子翻开日记本中的歌词（组员日记本本 1-1），带领组员学习。

大家天天都在努力上课，咱们一起学一个好玩有意思的歌好好轻松一下吧！大家要记得歌词和曲调哦，我们每次活动开始我们都会一起唱这首歌，唱起此歌就说明好玩有意思的活动时间又到啦，开始活动啦！

## 三、主题活动《七彩生活》（30分钟）

### 1、引言故事《我的心灵小屋》（5分钟）

副组长播放 PPT\_1，组长请大家翻开组员日记本第一页。讲引言小故事，介绍《我的心灵小屋》。好久以前，小猪家三兄弟一直跟妈妈住在一起，小猪们慢慢长大，他们要独立离开家庭，各自建自己的房子，老大用禾草建房，老二用不木头建房，老三用坚硬的砖头建房。一天大灰狼来袭，老大和老二的房都被大灰狼弄坏了，结果老三用稳固的砖头不受危险入侵的房子，成功安全地等待母亲回来。其实我们心里都有可以建立这样的一所房子，只要找到强而有力的砖头，一步一步去建它，外面有多少危险都可以稳固坚强地面对，最后达成我们的目标。我们从今天开始，将与大家一起来建这样的房子——心灵之屋。大家看到这个心灵小屋上面有放砖头的位置，我们这次心理弹性之旅一共有十次的活动，每一次活动就是一次放砖头的过程，我们参与越投入，房子就建的越牢，就越能抵抗外界的压力和困难。那咱们猜猜今天这次活动的砖头是什么呢？《七彩生活》——不开心很正常，我的开心我做主。我们休息 10 分钟后，马上回来开始我们今天的主题活动《七彩生活》。

### 2、组员画七彩生活（15分钟）

组长向每个组员派发一套彩笔，打开组员日记本《七彩生活》画布（1-3）。请每个组员想出现在生活中的开心的事情和不开心的事情，写在这些空白云彩里。然后找出一个颜色来形容开心的事情和不开心的事情，涂在云彩里。

### 3、组员分享自己的七彩生活（15分钟）

1) 分享生活中让他们印象最深刻、最开心的内容

*你的生活中都有哪些开心的事情啊？你用了什么颜色代表呢？*

2) 分享不开心的事情和他们的感受，当组员讲到不开心的事情，重点引导遇到困难时是怎么应对的，可以怎么做。

*虽然画面中有黑色和灰色（不开心的事），但这些颜色与其他亮色合在一起时，也变得不那么暗淡了，相反，在它们的衬托之下，甚至变得更生动了。*

3) 对整个画面的印象和感受。

看着自己的整个画面有什么感受？（如果组员愿意，可以让他展示给大家看）

#### 4、组长总结

**生活是丰富多彩的。**就如大家的图上一样，生活是色彩缤纷的。当然开心的同时，有时候也会遇到让我们不愉快的事情，当时我们会很不开心，但是如果我們只看到不开心的哪个部分，就会错过色彩缤纷的部分啦。暗色（灰色）也是色彩的一部分，也就是我们生活的一部分，我们可以选择只看暗色，同样也可以选择看到生活的彩色。所以大家要记得，我们生活的多姿多彩的，这些色彩会给我们快乐，也会促进我们成长。所以这此活动的小口号就是——**不开心很正常，我的开心我做主。**但是生活上遇到不开心的事了怎么办呢？同学们耐心等待，咱们下面的9次活动就会学习怎么处理和应对不开心的事情的招法！

## 四、总结和介绍组员日记本（15分钟）

### 1、介绍组员日记本及布置心理弹性练习（13分钟）

你可能已经看到，日记本分为几个部分，每个部分都有特别的用处：

**第一部分：**是我们还没有建好的心灵小屋，现在我就发给大家第一块砖头（发给主题贴纸，指导大家一起贴在“1”的位置）。今天我们的主题活动是什么啊？（七彩生活）我们的小口号是？（**不开心很正常，我的开心我做主。**）

**第二部分：**就是我们活动的成果，我们刚刚已经画完了自己的七彩生活

**第三部分：**是我们的心理弹性练习，这个需要大家回去完成。

今天的心理弹性练习就是，找到你的目标。请大家看组员日记的第一页。今天我们对这次小组活动有了大概的了解。我希望每个人回去想一想，通过这十次活动，你想要达成一个什么目标，给自己一个提高心理弹性的目标。填写在《心理弹性练习第一次》的空白处。这个目标可以跟自我调节有关：比如“我会三思而后行”，“我烦躁时会让自己冷静下来”。也可以和交朋友有关，比如“我会聆听别人说话”，“我会主动认识一个新朋友”。和愿意听你讲这些的一个长辈聊聊你的这些想法，和他一起完成这个心理弹性练习。有了目标之后，你就可以把每一个点滴的进步记录在你的成功日志上啦！

**第四部分：**你的“成功日志”。（请组员翻到这一页）你也可以记录一些在小组之外让你感觉到骄傲自豪的事情。我希望你们能够注意到你做的很棒的事情，或者是那些尽管还没有成功，但是正在积极去做的事情。可以用文字，也可以用颜色和绘画表达。

**第五部分：**是印花收集单，那么什么时候你可以得到印花呢？

- 1) 每次小组都记得带了组员日记本，奖一个印花。
- 2) 每次在成功日志上填了至少一项，奖一个印花。
- 3) 完成了心理弹性作业，奖一个印花。
- 4) 在小组中和大家分享了自己的如何完成自己的弹性任务，奖一个印花。
- 5) 认真参加小组活动，表现出合作精神，奖一个印花。

每次小组活动，如果你做到了以下几项任务，你都可以积攒5个印花，10个印花可以换取（奖

品 1), 20 个印花可以换 (奖品 2), 30 个印花可以换 (奖品 3), 40 个印花可以换 (奖品 4) 50 个印花可以换 (奖品 5)。

今天是第一次小组活动, 所有人都表现很好, 所以每个人可以收集五个印花。今天的活动主题是什么? (七彩生活) 好, 请每个同学都在印花单上写下这次活动的主题, 然后到我这里来领印花单 (每个人发五个印花, 贴在自己的印花收集单上)。

## 2、唱组歌结束活动 (2 分钟)

## 组员日记本 1-1：组歌——心理弹性之歌

在田野旁边小小村庄  
有一群好朋友  
我们活泼又聪明  
我们乐观又善良  
我们面对困难积极解决  
绝不会被打倒  
我们是心理弹性最最好榜样  
噢 亲爱的朋友呀  
噢 亲爱的朋友呀  
我们倾听尊重善于沟通  
团结又友爱  
我们一定会有美好的未来

## 组员日记本 1-2：我的心灵小屋

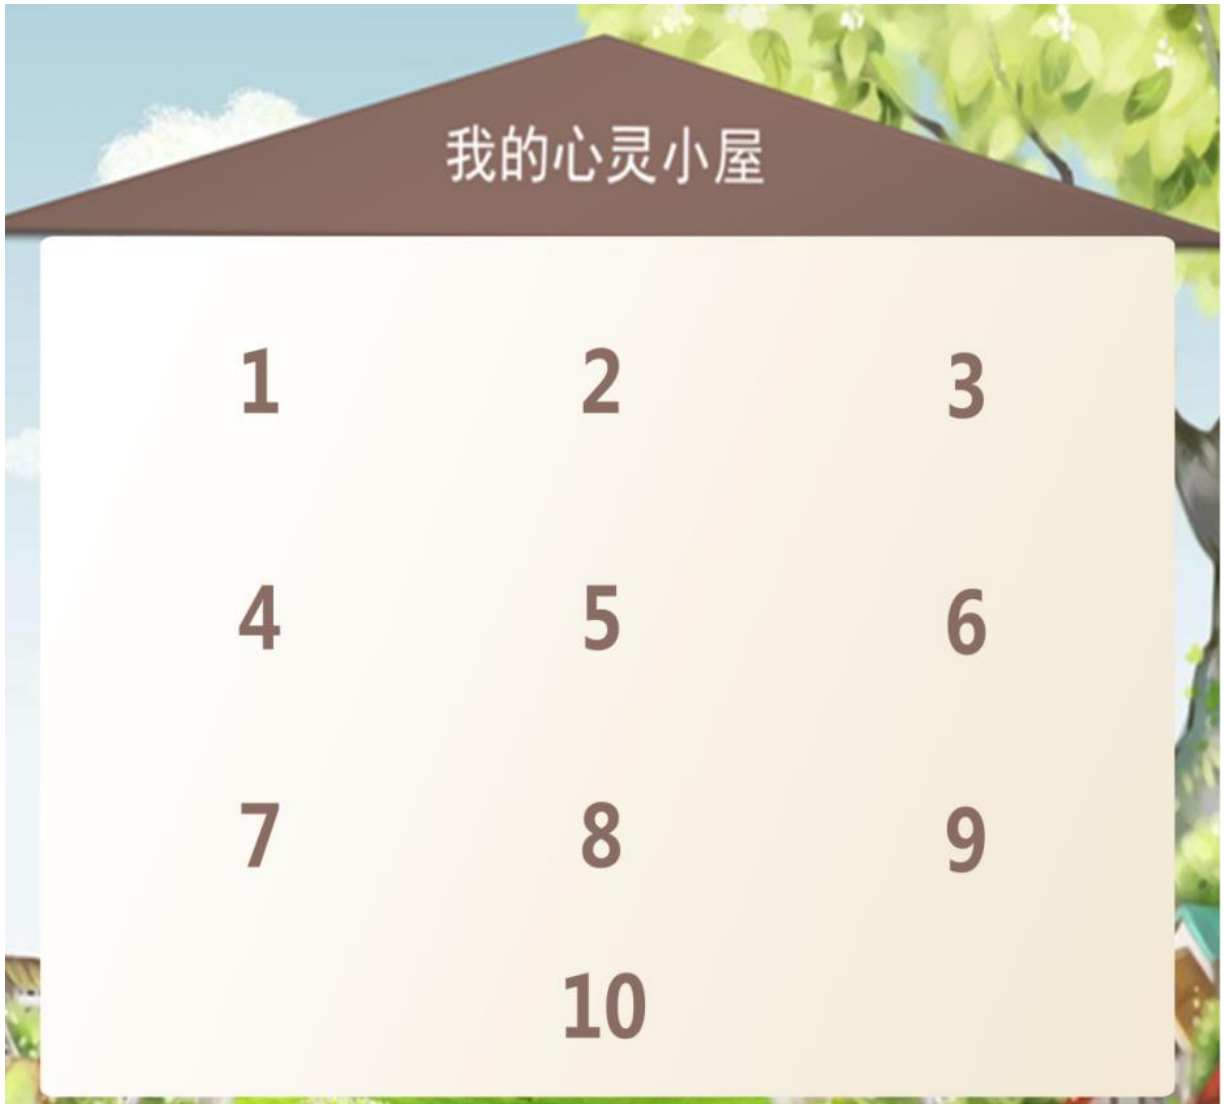

组员日记本 1-3: 《七彩生活》画布

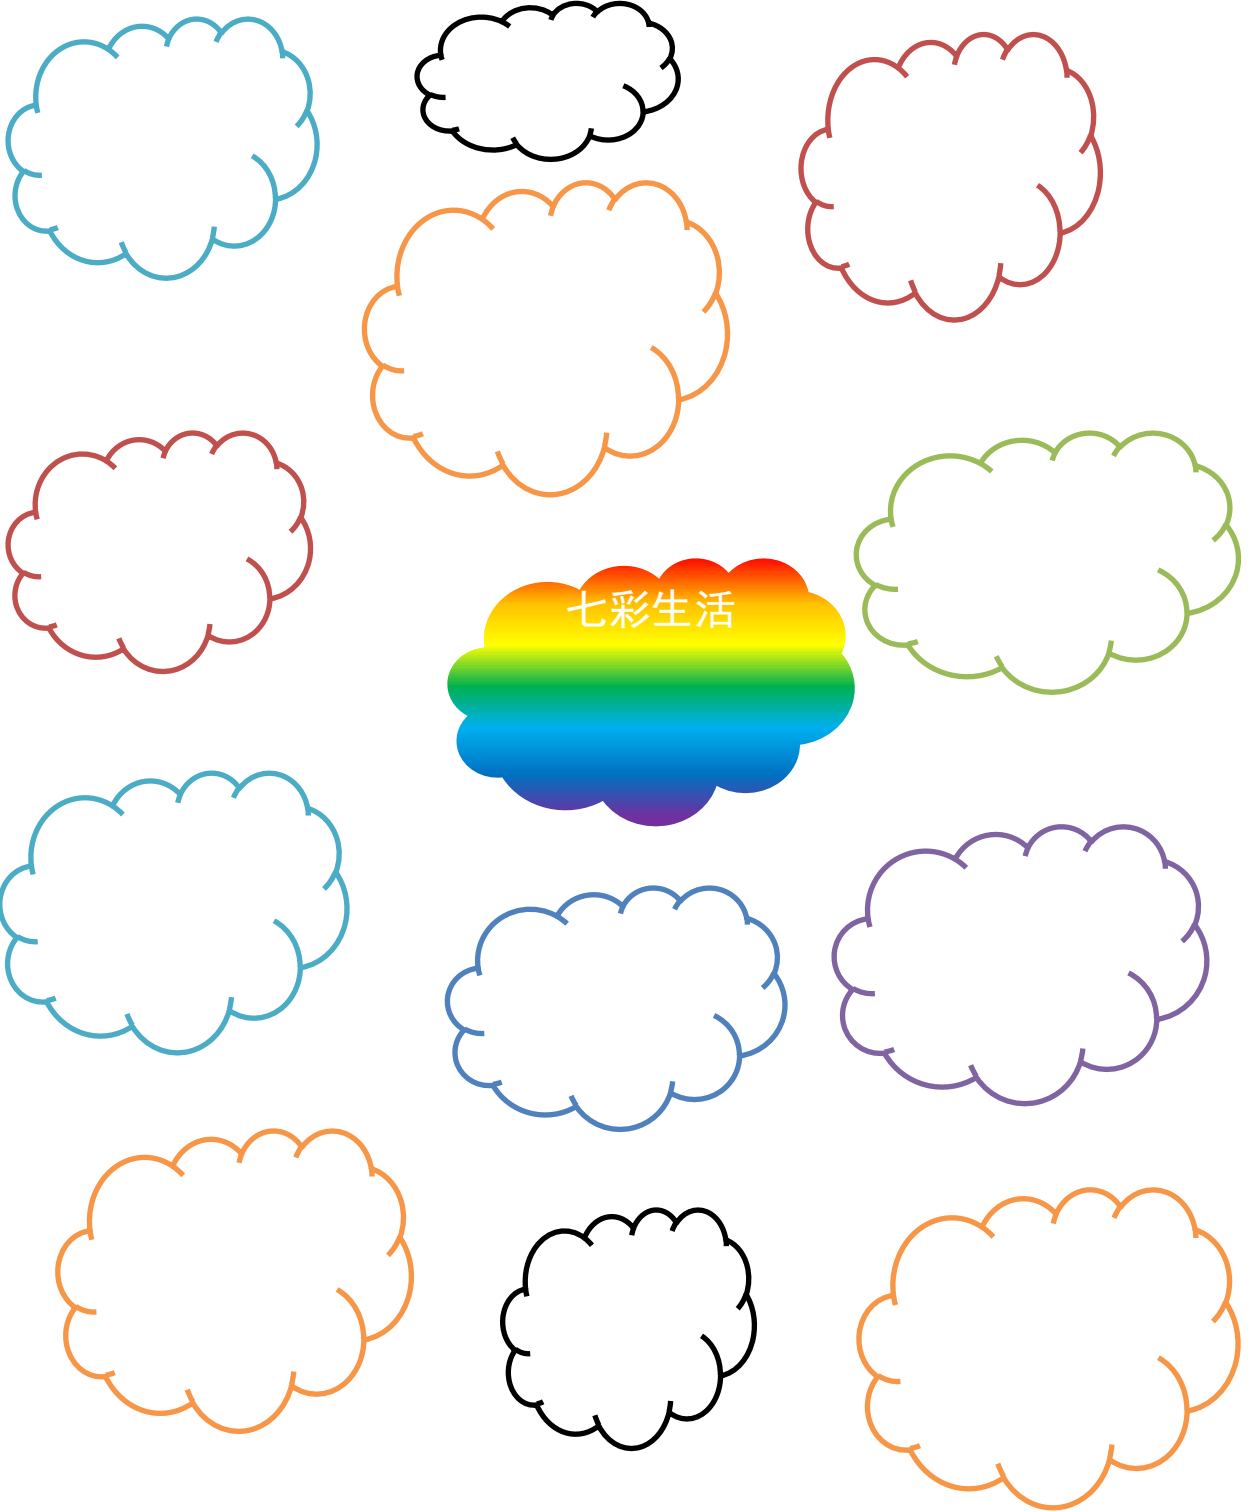



## 心理弹性 第一次 我的目标

姓名

日期

我决定要努力让自己成为一个有心理弹性的人。我的目标是：

请用具体和积极的语言写下你的目标——例如，“我会在烦恼的时候，用些高招让自己冷静下来”。

  
  

我可以通过以下几个方面实现这个目标：

1. 在我的成功日志上记录我迈向这个目标的每个点滴进步。

2.

3.

我和我的长辈谈了我的目标，他们会这样帮助我实现我的目标：

1. 每星期，都会帮我指出我朝向我的目标做的努力，或是我取得的点滴进步。

2.

3.

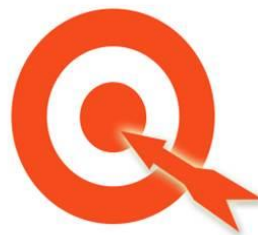

我的签名

长辈的签名

## 组员日记本 1-5：组员印花单

### 秀秀你集齐的印花吧

|    | 活动目标 | 记得带来了组员日记 | 完成心理弹性任务 | 分享了如何完成弹性任务 | 成功日志上填了一项 | 认真参加小组，有合作精神 |
|----|------|-----------|----------|-------------|-----------|--------------|
| 1  |      |           |          |             |           |              |
| 2  |      |           |          |             |           |              |
| 3  |      |           |          |             |           |              |
| 4  |      |           |          |             |           |              |
| 5  |      |           |          |             |           |              |
| 6  |      |           |          |             |           |              |
| 7  |      |           |          |             |           |              |
| 8  |      |           |          |             |           |              |
| 9  |      |           |          |             |           |              |
| 10 |      |           |          |             |           |              |

**这都是我们努力的见证！**

## 附件 1.1 小组规则海报

### 小组规则承诺书

作为小组的珍贵一员，我承诺，在小组中，我会做到：

1. 礼貌：见到老师和同学微笑点头打招呼。
2. 安静：组长在说话时，同学在分享时要保持安静。
3. 尊重：不刺探和揭露别人的隐私。
4. 聆听：不打断别人、不取笑别人。
5. 开放：真诚自由的表达自己的想法和观点。
6. 保密：对同学分享的内容保密。做到 3 不知：家长不知、老师不知、其他同学不知。
7. 合作：相信自己，也相信别人，和其他同学一起协作完成任务。
8. 积极：积极参与活动，积极分享自己的想法和感受。
9. 友好：不与别人发生言语冲突或肢体冲突，行动之前停下来想三秒
10. 不评判：如果自己不同意别人的想法，也能尊重对方。

我名签出，遵守规则，一诺千金！

# 第二次活动 积极剑客

## 主题口号

积极剑客、消极全撤！我们都是积极小剑客！

## 活动理念

想法和感受密切相连。非理性想法会导致情绪紧张，不利于处理问题。理性、现实的想法会带来快乐，让事情朝积极方面发展。增强自我觉察，学习通过自我对话对事件和情况积极再定义，让积极成为一种习惯是本次活动的主题。

## 活动目标

1. 了解想法和行为紧密相连
2. 学习具体、暂时、事实三种积极在定义的自我对话方法
3. 练习使用积极自我对话把消极想法转化成积极想法

## 活动流程

|               |                                                                                        |       |
|---------------|----------------------------------------------------------------------------------------|-------|
| 一、回顾和热身       | 1、打招呼<br>2、唱组歌<br>3、热身活动《勇往直前》<br>4、回顾成功日志和心理弹性练习                                      | 15 分钟 |
| 二、主题活动《积极的小新》 | 1、播放《不气馁的小新》<br>2、播放《打不到的灰太狼》<br>3、呈现压力想法方程式，积极想法的原则                                   | 30 分钟 |
|               | 休息一下                                                                                   | 10 分钟 |
| 三、主题活动《积极三剑客》 | 1、讲述故事《拯救小猪村》<br>2、分析不同的消极想法转化的方法：暂时剑客、具体剑客、事实剑客<br>3、分小队，领取海报，完成消极想法转化练习<br>4、分享和组长总结 | 30 分钟 |

|               |                                                        |       |
|---------------|--------------------------------------------------------|-------|
| 四、总结与布置心理弹性练习 | 1、组员分享印象深刻的地方<br>2、组长总结，发给主题贴纸<br>3、印花奖励<br>4、布置心理弹性练习 | 15 分钟 |
|---------------|--------------------------------------------------------|-------|

## 所需材料

1. PPT\_2 笔记本电脑，投影仪，音箱，印花贴纸，小组规则海报，水彩笔 10 套，胶水、胶条，奖品五种，玩偶灰太狼
2. 砖头贴纸 10 张

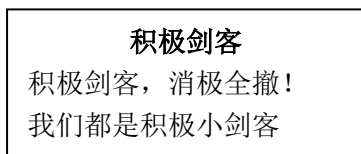

3. 《小组规则》海报
4. 视频 2-1《不气馁的小新》
5. 视频 2-2《打不到的灰太狼》
6. 组员日记本(组长备活页若干，供忘带组员日记本的同学使用)
  - 2-1《积极剑客-拯救小猪村活动》海报
  - 2-2 心理弹性练习第二次《积极剑客》

## 活动方案

### 一、回顾与热身（15 分钟）

#### 1、打招呼

如上次一活动描述一样，组长跟每个组员打招呼。

#### 2、唱组歌

#### 3、回顾活动

- 1) 请组员分别讲讲自己的心理弹性目标。
- 2) 问“请向小组同学朗读你的成功日志上的一项，或是你打算怎样实现你的目标”。组长请注意一定要在表扬成功事件的同时，真诚的表扬那些正在付出的努力。如果有组员没有更新成功日志，鼓励他向小组说说他/她为了达到目标所做的一个点滴努力，然后请他/她记录在成功日志上。
- 3) 直到每个组员都有机会发言后，组长总结，并记录组员印花单。
- 4) 组长总结并引出本次活动主题。

嗨，同学们，大家好。很高兴又和大家见面了。我好想你们啊。大家有没有想我？好感动哦。还记得我们上次活动的主题是什么吗？对，七彩生活。从中我们学到了什么呢？上次活动我们找到了自己的最佳搭档，有了自己的小队，还一起共同作画，描绘了我们的精彩生活，生活有暗淡的不开心，也有鲜活亮丽的开心。如果我们总是看到暗淡的一面，就会忘记它也有其他的美丽色彩，我们就只会活在不开心之中，其实暗淡只是彩色的一部分，它让其他颜色变得更鲜艳。所以，不开心，我说得算！但大家平时都会那么顺利就想开心的是吗？那么遇到不开心的事情该怎么办呢？

#### 4、热身活动：“勇往直前”

在活动开始之前大家想不想做游戏啊？好的，下面我们就做一个很好玩很了不起的游戏。同学们，请拿起你们的语文课本，站起来，右手的五指张开，用右手的小拇指和无名指紧紧地夹住课本。任何时候都不能掉哦。然后右脚离开地面。好，大家做的很不错，往前走一步，对，再走一步。在这个过程中，大家有什么感受呢？是不是很难受，很累，前进很困难，甚至有跌倒的可能。很好，其实，我们这些感受就和我们有压力时感受很像。我们手里的书就像我们生活中的各种压力。在今天的活动中我们就要向三位厉害的积极剑客学习如何应对这些压力。

## 二、主题活动：《积极的小新》（30分钟）

### 1. 引言

讨论大家会遇到什么压力，在这些压力下有什么感受，是怎么想的呢。

生活中有许许多多让我们开心的事儿，但偶尔也会遭遇不开心——这就像硬币的两面，翻到亮色面或暗色面都是有可能的。

当我们遇到困难的事儿，我们会感到不开心，就像翻到了硬币的灰暗面，那么这时我们该怎么办呢？

大家还记得我们上一次活动作的那幅画吗？就算画纸上有了暗淡的颜色，但只要彩色的色块多起来，画面一样很漂亮对不对~

所以，当我们遇到灰暗的不开心，这时我们该怎么办呢？继续不开心下去吗？嗯~我们会要想办法把硬币给扳过来，把灰暗变成彩色，同样地，把不开心转变成开心才好，对不对！

那么，小朋友们会问了，怎么才能把不开心变成开心呢？嗯，就是转变自己的想法，让自己的头脑里充满积极的念头。比如，一个玻璃杯里装了半杯水——如果我们想，怎么只剩半杯了呢，这时，我们会有小小的不开心；但是，如果我们这样想，哇幸好还有半杯呢，那这时候我们肯定很开心了。

### 2. 播放《不气馁的小新》及讨论

组长带领同学讨论小新的爸爸遇到的压力事件--被上司骂，一开始回到家里的想法是怎么样，然后看到小新被妈妈骂的过程后爸爸的想法改变成怎样，这两种不同的想法会带来怎样的结果？

爸爸在工作遇到不如意，被上司骂了，感到很伤心，觉得自己做不好工作，认为自己不再适合这份工作。这样的想法带来的结果是：丢了工作，没钱还贷款，心情很差。而第二天看到小新

跟妈妈的互动，他的想法改变了，他认为遇到困难不气馁，困难只是暂时的，自己仍然可以面对他。带来的结果是：继续上班，家庭经济不会受影响，心情愉快。爸爸那种想法会带来好的结果，你是爸爸会愿意怎么想？

### 3. 播放《打不到的灰太狼》及讨论

灰太狼有什么想法每一次虽然失败了都会再接再厉？

### 4. 总结压力想法方程式：感受→想法→行动（结果）

我们把带来不好结果的想法叫消极的想法。总结：积极想法的原则—带来好的结果。如果我们一直处在消极想法，就只是活在不开心之中，不会有好的结果，也不能有好的行为，不能解决问题。

## 三、主题活动：《积极三剑客》（40 分钟）

### 1. 引言

组长带领讨论之前提到生活上遇到压力之下，那些想法会带来怎么样的结果。带出问题：真的遇到消极的想法的时候我们怎么办呢？

### 2. 组长讲述《积极三剑客》的故事

很久之前，在美丽的山脚下有一个小猪村，那里景色很好，人也很有善，一直生活的很开心。可是，突然有一天，可恶的事发生了。小猪村来了一个可怕的人物，她就是来自地狱的消极巫婆！她以看到别人痛苦为乐，看到小猪越痛苦越快乐。她拥有很特别的法术，就是把处在不同压力下的小猪出现消极的想法，让他们活着伤心痛苦之中。消极巫婆越来越放肆，这时三只小猪刚好遇到不同的压力事件，消极巫婆是不会错过这令人痛苦的机会，她的势力影响到三只小猪的生活了。此时，小猪村的天神看不过眼了，特派三个“积极剑客”，誓要拯救小猪村！当消极巫婆施法使 3 只小猪堕入在消极想法中时，三个“积极剑客”赶到现场。消极巫婆和积极剑客的战争一触即发！

我们要跟积极剑客一起拯救三只小猪，要破灭消极巫婆的法术，我们要先了解小猪的压力是什么。

老大刚刚遇到的不如意的事，就是收到一张成绩欠佳的成绩单。巫婆对他使法术，让老大不断的出现消极想法：哦，我成绩不好，我永远都不好了，我很笨，我永远都学不好了...

[此时，组长与同学们讨论这样的想法属于什么想法？会带来怎么样的结果？心情会怎么样？你现在要跟积极剑客一起救小猪，你会怎么帮小猪转变想法呢？]

三大积极剑客出招了，为了拯救老大，首先是“暂时剑客”出动。他把积极力量灌注到小猪的心灵，力量告诉小猪：这次成绩不好只是暂时的，不等于以后都不好，要对自己有信心！

[组长与同学们讨论这样的转变有什么感觉，会带了什么样的结果，这样的想法属于什么想法。]

老大的消极想法消除了，不再痛苦。巫婆没有因此而罢休，转而对付老二。老二刚刚参加完篮球比赛，他今天投篮很差，正常比赛没有得到一分，巫婆又施法了，老二不断的想：

我打球那么差，怎么打都不进，我什么都不行，我是一个没有用的人...

[同样，组长与同学们讨论这样的想法属于什么想法？会带来什么样的结果？心情会怎么样？你现在要跟积极剑客一起救小猪，你会怎么帮小猪转变想法呢？]

这次由三大积极剑客中的“具体”剑客出招。灌注积极力量让小猪领悟：我打篮球打不好，不等于我做什么都不好，我仍然有很多做的很好的地方！

[同上讨论]

看到两个魔法被破灭，巫婆只能对老三极力一搏了。老三遇到不愉快的事，就是有别村子的人遇到老三，觉得老三长得瘦弱，他的哥哥家人又被巫婆控制，就给他起外号“无用猪”，跟他说“你这个无用的家伙，不要接近我，我是不会跟你玩的。”在消极法术的影响下，老三不断的想着：我真的很没用，我都不能保护家人，都是我的错。我不值得跟别人一起相处。

[同上讨论]

此时，到“事实”剑客出动了，灌注积极力量，让老三理解：他们没有受到巫婆的影响，他们不理解我的难处。我力量不够对抗巫婆，不是我的错，我可以寻找帮忙的！

巫婆的诡计破灭了，三只小猪现在充满积极力量，跟积极剑客联手拯救小猪村其他成员。

### 3. 总结转变消极想法的三大方法

- 1) 暂时剑客
- 2) 具体剑客
- 3) 事实剑客

### 4. 拯救小猪村活动

- 1) 组长表达大家都懂得转变消极想法的方法，可以跟积极剑客一起拯救其他成员，消除他们的消极想法
- 2) 分组，派发《积极剑客-拯救小猪村活动》海报，分组完成内容。

### 5. 分享成果

讨论在不同想法下会产生什么感受和结果。

### 6. 组长继续故事

巫婆看大势已去，只好走为上计。巫婆被赶走，小猪村回复到快乐的日子。但是巫婆只是离开了小猪村而已，她会去世界不同的地方，影响人们的想法，让他们痛苦。

我们已经学会转化消极，已经是积极剑客的一员。我们可以帮助自己，同样可以帮助身边人。讨论如何帮助身边的人呢，举例讨论。

### 7. 总结：

- 1) 转化消极的方法有：暂时剑客、具体剑客、事实剑客
- 2) 积极剑客、消极全撤！我们都是积极小剑客！



## 四、总结与心理弹性练习布置（15 分钟）

### 1. 组员分享

组长问同学印象深刻的地方，对于讲的好的，给予“爱的鼓励”。

### 2. 组长总结

组长总结本次活动的核心：**积极的想法带来好的行为，消极的想法带来不好的行为；面对压力的时候我们可以选择积极的想法，带来积极的感受和行为。**发给砖头贴纸，强调这是我们本次活动的小口号，并带领大家一起念一遍：**积极剑客、消极全撤！我们都是积极小剑客！**

### 3. 印花奖励

组长总结今天同学的表现，表扬做的很好的地方，对主动参与活动的孩子奖励一个印花（不要挫败没有的印花的孩子，鼓励他们下次积极参与小组活动）。

### 4. 布置心理弹性练习

今天的心理弹性练习就是，记录你的想法。请大家看组员日记。海报中分成两个部分，一部分为小猪们在压力事件下的消极想法，想法旁边会有三个圆圈：**暂时、具体、事实**。组员需要选择适合转化消极想法的剑客，让后把转变后的积极想法写在另一部分对应的积极想法方块中。

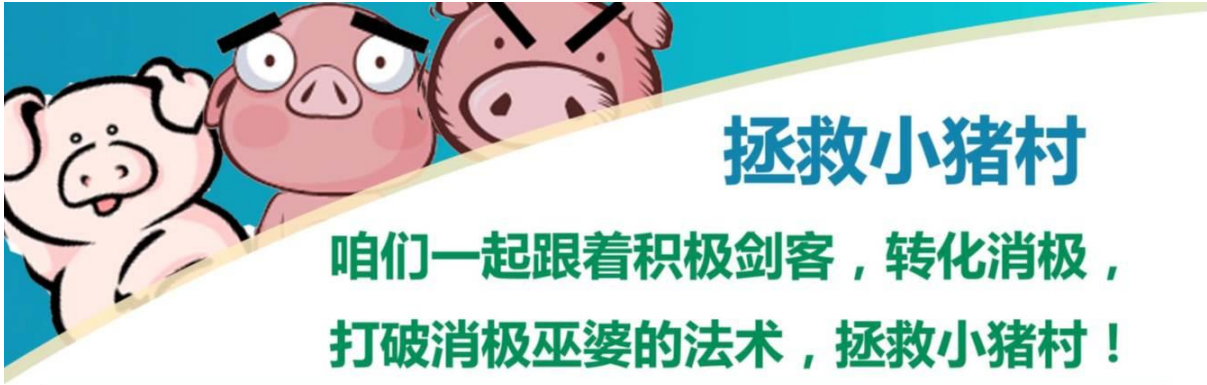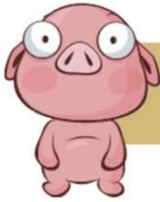

情境一：我写的作文，老师给了很低的分数

**消极**

- 1、我太差了，永远都写不好作文的
- 2、我连作文都写不好，我什么都不行的...
- 3、作文的要求很高很高，我就不是作文的料

**积极**

灌注积极力量

暂时剑客

事实剑客

具体剑客

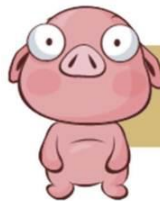

情境二：因为做错事，被长辈骂了

**消极**

- 1、都是我的错，他们说我的都是对的
- 2、他们骂我，一定是不爱我了
- 3、我就是都做不好，永远都不会好的

**积极**

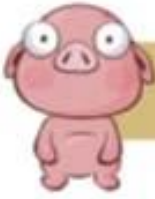

### 情境三：我被朋友欺负，他们不跟我玩

#### 消极

- 1、他们就是可恨，他一定是觉得我好欺负
- 2、我就是到处都会被欺负的人
- 3、我永远都不会被他们接受，我不能跟他们成为朋友
- 4、他们谁都不会欺负，就只会欺负我一个

#### 积极

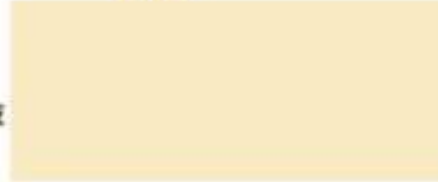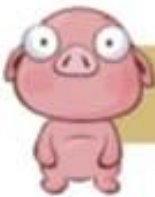

### 情境四：我被冤枉偷东西了

#### 消极

- 1、老师偏心，老师就是看不惯我
- 2、我这样的人就是老会被冤枉的
- 3、其他人不会发生冤枉的事，只有我会有
- 4、不好的事都只会发生到我头上，我就是那么差劲

#### 积极

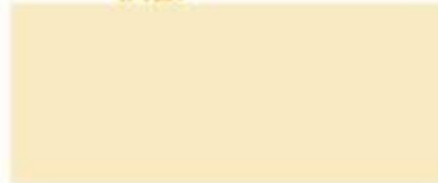

恭喜大家，小猪村经过我们灌注积极力量后，小猪们都恢复了愉快的生活，好样的积极小剑客们！

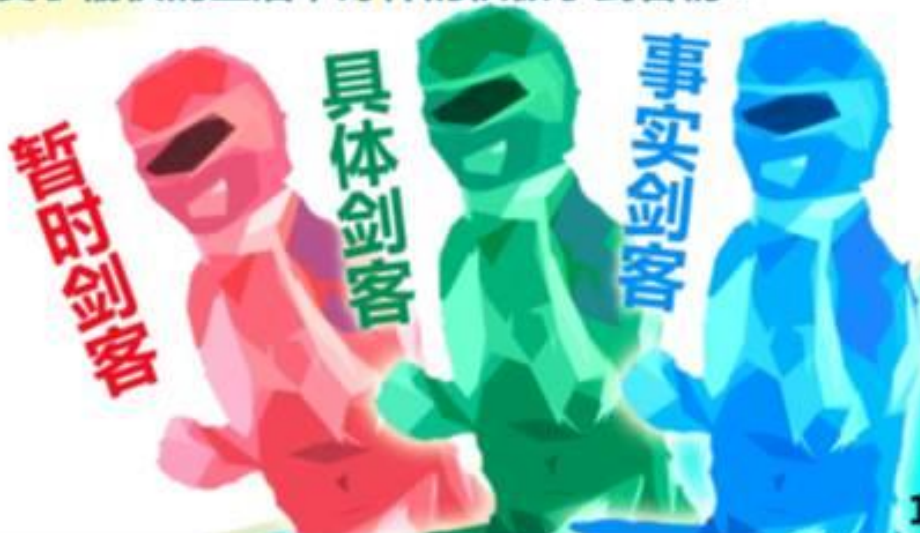

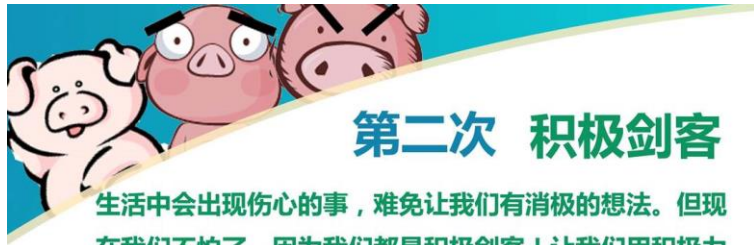

## 第二次 积极剑客

生活中会出现伤心的事，难免让我们有消极的想法。但现在我们不怕了，因为我们都是积极剑客！让我们用积极力量，转化消极，笑看生活！

这个星期，让我伤心的压力事件是

此压力事件之下，你的感受是

我的消极想法是

转化我的消极想法，我用到的积极剑客是  
请在你使用到的积极剑客的圆圈中涂上颜色

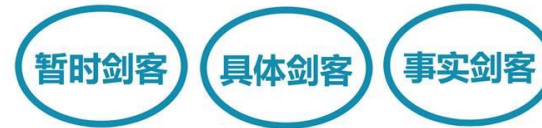

我的积极想法是

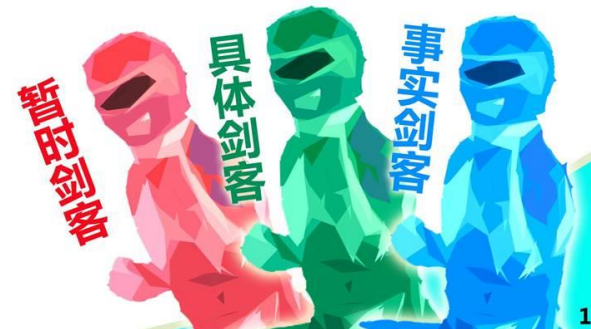

# 第三次活动 情绪高手

## 主题口号

压力来了我不怕，情绪高手有办法！

## 活动理念

情绪智力是心理弹性的一个重要因素，识别情绪和管理情绪的能力在儿童的交往和成长过程中重要的能力。学习识别积极情绪、消极情绪，了解情绪对行为和想法的影响，如何有效管理压力情绪是本次活动的主题。

## 活动目标

1. 学会识别情绪
2. 了解情绪对想法和处理压力事件的影响
3. 学习管理压力情绪的方法

## 活动流程

|                 |                                                        |       |
|-----------------|--------------------------------------------------------|-------|
| 一、回顾            | 1、打招呼<br>2、唱组歌<br>3、热身活动《情绪配对》<br>4、回顾心理弹性练习           | 15 分钟 |
| 二、主题活动《情绪高手》    | 1、播放动画《我好难过》讨论、总结<br>2、动画《我好生气》讨论、总结<br>3、组长总结四种情绪调整法  | 30 分钟 |
|                 | 休息一下                                                   | 10 分钟 |
| 四、主题活动《情绪高手论压力》 | 1、解释压力-情绪的关系<br>2、组员画自己的情绪罐子<br>3、分享压力，高手出招<br>4、组长总结  | 30 分钟 |
| 五、总结与布置心理弹性练习   | 1、组员分享印象深刻的地方<br>2、组长总结，发给主题贴纸<br>3、印花奖励<br>4、布置心理弹性练习 | 15 分钟 |

## 所需材料

1. PPT\_2 笔记本电脑，投影仪，音箱，印花贴纸，小组规则海报，水彩笔 10 套，胶水、胶条，奖品五种，玩偶灰太狼
2. 砖头贴纸 10 张

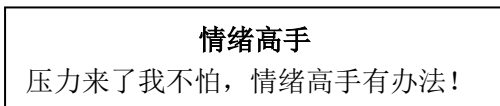

3. 情绪签 10 张
4. 组员日记本（组长准备若干活页）
  - 3-1 主题活动《情绪高手论压力》
  - 3-2 心理弹性练习第三次《我的感觉》

## 活动方案

### 一、回顾与热身（15 分钟）

#### 1. 打招呼

如上次一活动描述一样，组长跟每个组员打招呼。

#### 2. 唱组歌

#### 3. 回顾活动

- 1) 请组员分别分享自己的心理弹性练习。
- 2) 请小组同学朗读你成功日志上的一项。
- 3) 直到每个组员都有机会发言后，组长总结，并记录组员印花单。
- 4) 组长总结并引出本次活动主题。

上次我们活动的主题是什么？对，积极剑客。那我们的口号是什么？对，积极剑客，消极全撤，我们都是积极小剑客。我们已经了解到想法和行为之间的关系。积极的想法带来积极结果，消极想法带来消极结果。当遇到不开心的事情时，可以做个积极剑客，把消极巫婆赶走。同学们回家也努力练习了，效果很好。有的时候啊，遇到一些非常不开心的事情的时候，这些事情会影响我么你的想法，今天我们就来学习如何做个《情绪高手》！（播放 PPT）

#### 4. 热身活动《情绪配对》<sup>2</sup>

下面咱们要做的这个活动叫做《情绪配对》，每个人到这里来抽一张情绪签，千万不要让别人看到，然后做出情绪表情，不能用语言交流，找到和自己相同情绪的伙伴。好，现在开始（放音乐）。

[若 10 人小组，可以设置：高兴、生气、自豪、害怕、难过。情绪签，备选的情绪还有：无聊、嫉妒、好奇、不安、烦恼的、沮丧，做完活动后，请组员讨论可以通过什么了解别人的情绪，

都有哪些线索]

## 二、主题活动《情绪高手》(30分钟)

### 1. 引言

大家能够识别这么多情绪，真不错，今天呢，我们有两个情绪高手也来参加我们的活动了。他们一个是小天竺鼠，一个是小兔子。我们先来看看小天竺鼠都遇到了什么情绪。他是怎么调整自己的情绪的？

### 2. 播放幻灯片《我好难过》(前半段)(根据图画书做成幻灯片)

难过是一种灰灰的、累累的感觉！

### 3. 讨论

大家是否遇到过让人难过的事情，有过相同的感受，当时是做了些什么？好，接下来我们就看看这个小情绪高手是如何调整自己的难过情绪的，同学们要用心听，把他所用的所有方法都找出来，看谁找的多。

### 4. 播放幻灯片《我好难过》(后半段)(根据图画书做成幻灯片)

### 5. 总结

组长总结可以管理“难过”的高招，写在黑板上，注意要根据下面的四种调整方法记录，以便下一个活动总结（跟别人聊聊，哭一哭，荡秋千，做东西，和朋友玩儿）

### 6. 播放幻灯片《我好生气》(前半段)(根据图画书做成幻灯片)

这个小天竺鼠还是满厉害的，想出了这么多方法来调整自己的情绪！下面一个情绪高手是小兔子，他遇到了很多让他生气的事情，我们一起来看看，都是些什么事儿。

怒气是一种强烈的、热血沸腾的感觉

### 7. 讨论

[同上] 问同学有没有遇到过相同的事情、感觉。请同学分享自己的处理方法。

### 8. 播放幻灯片《我好生气》后半段<sup>5</sup>

### 9. 讨论

同上，请组员一起讨论，书中的小兔子有什么高招管理自己的“生气”。一起整理出来分类写在黑板上（冷静，深呼吸，跑步、汽车、玩玩具、休息一下、哭一哭、请别人帮忙、向别人倾诉）。

### 10. 总结

请组员和大家分享自己的方法。组长汇总方法，写在黑板上强调积极的调整方法。如果有的孩子提出了消极的方法，组长引导，积极调整原则是：不伤害别人，不带来新问题。组长把大家分享的方法归类。

- 1) 释放法：适当的哭泣、到空旷地大喊、唱出激情歌曲
- 2) 转移法：参加运动、听喜欢的音乐、看喜爱的电视节目、看书等
- 3) 倾诉法：找同伴聊天、找老师倾诉、找父母倾诉
- 4) 放松法：小猪放松法（见附件 3.2）

这里有人列举了一些调整情绪的方法，大家看看那些是好的方法，那些是不好的，这些方法又会带来什么呢？大家想想自己的经历，用过什么调解的方法呢？我们可以利用调解的效果把方法分成“积极的调解方法”和“消极的调解方法”。积极的调节方法让我们好好排解情绪，不带来其他问题；使用消极的方法不但不能排解情绪，还会出现更多的问题，让我们继续被情绪所影响，越来越难受不开心。**所以我们的积极调整原则是：排解情绪，不带来其他问题。**大家分享的调整方法很好，为了方便大家记住，老师这里为同学们把它们总结成 4 种良好的调整方法。放松法老师为大家带来秘籍招数哦，就是小猪调整法，大家要跟着我一起做哦（深呼吸三下，吸，呼，吸，呼，吸，呼，用手温暖脸颊，想开心的事，寻找帮助）。所以我们会看到，不同调解方法会带来不同的结果，积极的带来好的结果，消极会带来不好的结果，会让我们继续被情绪所困。所以我们要用积极的调整方法，做自己情绪的主人！学会了积极的情绪调整方法，我们先休息 10 分钟，回来之后就要开始实战啦！

### 三、主题活动《情绪高手论压力》（30 分钟）

#### 1. 引言

请大家打开组员日记《情绪高手论压力》[同时在黑板上画一个罐子。然后画出杯底一层涂黑。边画边说：]这是一个罐子，用来装我们情绪的罐子，我们每个人都有一些压力，看，就像这样，这是正常水平的压力。[请组员举例说明让他们感到有压力的事情（比如，太多作业、考试、被老师批评、和朋友吵架、和亲人分离等等）解释压力增多，情绪罐子水位增高]当发生了很多压力事件的时候，我们的情绪罐子就会升高，比如，今天上学我带了作业，被老师批评，上体育课的时候扭了脚，很多不顺心的事情遇到了一起，我们的罐子就更重了（边画边说）。如果压力都装到了瓶口，那么会怎么样？（生气、郁闷、沮丧、崩溃）。

#### 2. 组员画自己的情绪罐子

现在每个人都有了一个情绪罐子了。有时我们的压力很少，它的水位很低，比如刚考过试，放暑假了。有时呢，处在一个水位中等，有时可能会完全装满。请每个同学都写下现在，有哪些让你感到有压力的事情，写在左边，然后把自己的情绪写在罐子里，并选择适当的颜色涂在这些情绪上。

#### 3. 组员分享，请大家出情绪调整高招

看到你自己的情绪罐子，你有什么感受呢？现在呢，谁愿意说说自己的罐子里都装了哪些情绪，遇到了什么压力事件。我们现在都是情绪高手的身份，哪位专家愿意提出自己的调整方案呢？看来大家都有很不错的调整情绪的方法，只要我们有有效的方法，灰色情绪就不能一直影响



我们。但是只要我们用有效的调整方法，灰色的情绪就会能添上艳丽的颜色，成为情绪的主人，让我们好好面对困难。同时，我们知道身边的朋友是情绪调整很重要的人物，作为朋友的我们，我们也要在朋友有需要之时伸出支持之手。大家认为我们可以怎么做呢？大家之前都是如何做的呢？**我们都是调整情绪的高手，同时我们也关心朋友，不让情绪困扰他。**

#### 4. 组长总结

情绪就像天气一样，有晴天，有阴天，有雨天，有雪天。我们遇到好事的时候，会高兴，手舞足蹈，遇到坏事的时候会不高兴、悲观失望。当有压力的时候，我们会出现不好的情绪，就如我们在下雨天之中一样，会觉得很难受，天色很灰暗，但是雨下完了就会有晴天，情绪也是我们生命色彩中的一个部分。当我们的有压力的时候，不管是大人还是小孩，都会出现不好的情绪，**这是很正常的，每个人都有的**。只要我们能找到一些合适自己的方法积极调整自己的情绪，就会雨过天晴，开心就回到我们身边。我相信你们每个人都有一些高招，下面我们就一起分享一下，让每个人都有更多的好方法来应对压力情绪，成为情绪的主人，调整情绪的高手！

## 四、总结与心理弹性练习布置（15分钟）

### 1. 组员分享

组长问同学印象深刻的地方，对于讲的好的，给予“爱的鼓励”

### 2. 组长总结

组长总结本次活动的核心：压力事件会让我们有情绪，情绪低下会做出不同的行为，会感到不开心，是很正常的；不好情绪出现并不可怕，我们可以用积极的方法调整情绪，我们都是情绪高手，同时我们也关心朋友，不让情绪困扰他。发给主题贴纸：**压力来了我不怕，情绪高手有办法。**

### 3. 印花奖励

组长总结今天同学的表现，表扬做的很好的地方，对主动参与活动的孩子奖励一个印花。

### 4. 布置心理弹性练习

心理弹性练习第三次《我的感觉》

## 我的情绪罐子

这是你的情绪罐子，在左边写下你最近的压力事件，  
在罐子里填上这种压力带来的情绪，并选择合适的颜色涂在罐子里。

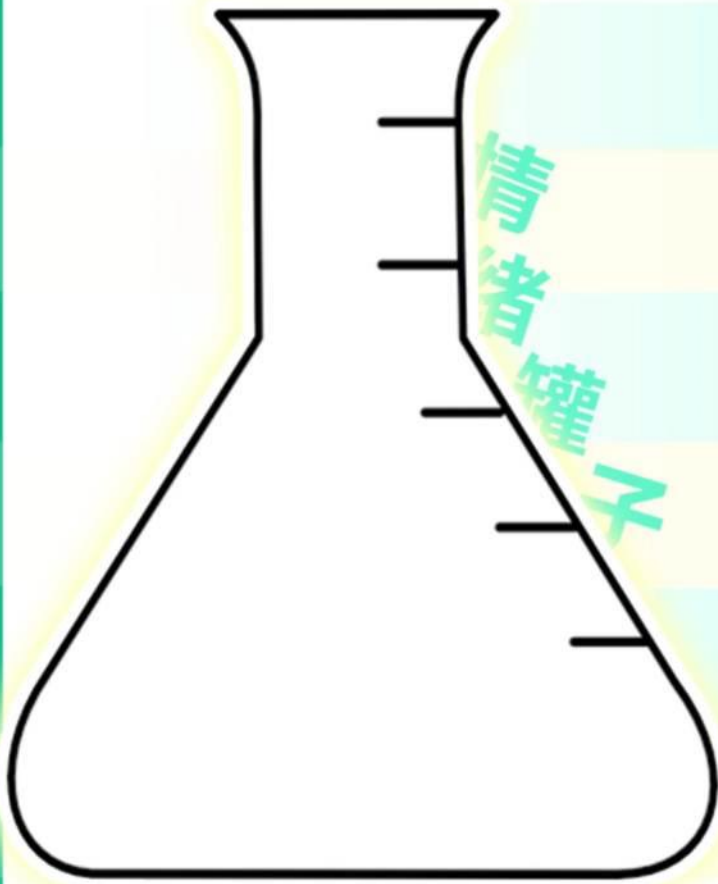

降低我情绪罐子水位的积极调整方法

### 第三次 我的感觉

请你记录最近一周发生事情和你的情绪，并写下来你用了什么方法调整自己的情绪。

让我生气的事情：

Blank area for writing about what made the person angry.

当我生气时，我用了下面的高招来调整自己：

Blank area for writing about coping strategies used when angry.

让我难过的事情：

Blank area for writing about what made the person sad.

当我难过时，我用了下面的高招来调整自己：

Blank area for writing about coping strategies used when sad.

让我紧张的事情：

Blank area for writing about what made the person nervous.

当我紧张时，我用了下面的高招来调整自己：

Blank area for writing about coping strategies used when nervous.

让我害怕的事情：

Blank area for writing about what made the person afraid.

当我害怕时，我用了下面的高招来调整自己：

Blank area for writing about coping strategies used when afraid.

我有这么多的感觉，我每天都不同！我有这么多的感觉，所以我很幸福！

# 第四次活动 沟通小能手

## 主题口号

自信沟通四部曲，我是沟通小能手！

## 活动理念

本次活动的主题是自信的沟通。学会自信的沟通时建立和保持健康同伴关系最重要的方面。自信式的沟通包含两个方面，自信的表达自己的和尊重理解别人。练习自信的表达自己的，可以帮助组员面对和处理与同伴之间发生的冲突或压力，帮助组员获得良好的同伴关系。

## 活动目标

1. 理解不同沟通模式的影响。
2. 学习自信式沟通。
3. 了解处理问题方式的多样性以及不同方式的影响。
4. 在典型同伴压力事件中练习自信式沟通。

## 活动流程

|                 |                                                                 |       |
|-----------------|-----------------------------------------------------------------|-------|
| 一、回顾            | 1、打招呼<br>2、唱组歌<br>3、热身活动《松鼠与大树》<br>4、回顾心理弹性练习                   | 15 分钟 |
| 二、主题活动《自信沟通四部曲》 | 1、讲述三兄弟沟通的故事<br>2、学习积极沟通四部曲：管理情绪、挺胸抬头、尊重平等、“我”的表达<br>3、学习“我”的表达 | 30 分钟 |
|                 | 休息一下                                                            | 10 分钟 |
| 三、主题活动《我是沟通小能手》 | 1、组长扮演冲突情境<br>2、头脑风暴支招<br>3、各小组扮演情境和解决方式<br>4、讨论分享              | 30 分钟 |

|               |                                                        |       |
|---------------|--------------------------------------------------------|-------|
| 四、总结与布置心理弹性练习 | 1、组员分享印象深刻的地方<br>2、组长总结，发给主题贴纸<br>3、印花奖励<br>4、布置心理弹性练习 | 15 分钟 |
|---------------|--------------------------------------------------------|-------|

## 所需材料

1. PPT\_4, 笔记本电脑, 投影仪, 音响, 小组规则海报, 印花贴纸, 水彩笔 10 套, 胶水、胶条奖品五种, 玩偶灰太狼
2. 主题砖头贴纸 10 张

**沟通小能手**  
自信沟通四部曲, 我是沟通小能手!

3. 视频 4-1 《谁都是平等》
4. 附件 4-1 《我是沟通小能手》活动活页 (2 张, 两个小队, 每队 5 人, 8 开纸打印出的)
5. 组员日记本  
4-1 心理弹性任第四次《我的选择》

## 活动方案

### 一、回顾与热身 (15 分钟)

1. 打招呼
2. 热身活动《松鼠与大树》
  - 1)、事先分组, 三人一组。二人扮大树, 面对对方, 伸出双手搭成一个圆圈; 一人扮松鼠, 并站在圆圈中间; 组长或其它没成对的学员担任竞争者。
  - 2)、组长喊“松鼠”, 大树不动, 扮演“松鼠”的人就必须离开原来的大树, 重新选择其他的大树; 竞争者就临时扮演松鼠并插到大树当中。
  - 3)、组长喊“大树”, 松鼠不动, 扮演“大树”的人就必须离开原先的同伴重新组合成一对大树, 并圈住松鼠, 竞争者就应临时扮演大树。
  - 4)、组长喊“森林着火啦”, 扮演大树和松鼠的人全部打散并重新组合, 扮演大树的人也可扮演松鼠, 松鼠也可扮演大树, 竞争者亦插入队伍当中。

*组长可以不断变化着发出口令, 大家作出相应的变化。在活动一开始安排 1—2 只无家可归的“小松鼠”充当竞争的角色, 这样在变化中必然会有新的“小松鼠”或“大树”被淘汰出来, 增加游戏乐趣。*
3. 回顾活动

- 1) 请组员分别分享自己的心理弹性练习。
- 2) 请小组同学朗读你成功日志上的一项。组长请注意一定要在表扬成功事件的同时，真诚的表扬那些正在付出的努力。（让其他组员给予爱的鼓励）
- 3) 直到每个组员都有机会发言后，组长总结，并记录组员印花单。
- 4) 组长总结并引出本次活动主题。

同学们做的都很好，还记得我们上次活动学到的四种方法管理自己的情绪的方法吗？——释放、转移、倾诉、放松！因为拥有这么多的情绪，所以我们过着丰富的生活。今天我们要在我们的**心灵小屋**上放上我们第四块砖头了，今天的活动是什么呢？——《沟通小能手》。

## 二、主题活动《自信沟通四部曲》（30分钟）

### 1. 组长讲述“三兄弟”的沟通故事。

三兄弟今天很下午邀请了小光同学到家里做客，他们一起做完作业，并且在家里玩了一会。但是小光玩的太投入，把家里弄得很乱，并且不小心把妈妈最喜欢的花瓶给弄破了！三兄弟看到了都很紧张。大家觉得三兄弟会怎么想？他们会对小光说些什么呢？三兄弟有着不同的性格，老大性格很冲动，说话直接，大家猜一猜他会怎么跟说？他说：“这个花瓶是我妈妈最喜欢的，小光你要赔，不然我以后都不跟你玩了！”小光听到这样的情况就大声说：“这不能怪我，都是你们不好，干嘛把花瓶放在在这里呢？”如果你是**小光**，听了老大的回应，你会有什么感受？效果会是怎样呢？他们之后会怎么做？这种沟通方式叫**攻击式沟通**（写在黑板上），这种沟通方式可以解决问题吗？老大那时很生气，他这样的表达看起来是表达了自己的情绪，但是小光听到了有什么反应？小光会觉得难受，也反过来攻击三兄弟。**所以攻击式沟通特点是“我好-你不好”**。对，沸羊羊同学有时会这样沟通。

我们一起来看看老二，老二性格担心怕事，你们猜老二会怎么说？他说：“哦……没事没事，这个不能玩我们玩别的，不要不理我们呀”。老二的说法大家有什么看法呢？**他这么说，小光可能会比较开心，但是老二心里真的这么想的吗？其实老二很担心妈妈回来看到花瓶碎了会骂他们三兄弟。老二的沟通方式叫退缩式沟通方式，特点是“我不好-你好”**。对，懒洋洋同学有时会这样沟通。

老三的性格稳重，自信，大家猜他会说什么？他说：“哦，花瓶不小心打破了，现在我很害怕妈妈回来会伤心，我们一起把碎片收拾好，等我妈妈回来后我们一起认错好吗？”老三跟老大和老二有什么不一样？嗯，他的沟通方式可以带来好的结果，并且双方都会有好的感受，这是**好的沟通方式，特点是“我好-你也好”**。那这种沟通方式怎么做到的呢？对，喜羊羊经常会这样沟通。

### 2. 讲解自信沟通的第一步：做情绪的主人

老大遇到冲突时的情绪是怎样呢？嗯他很生气，然后就骂了小光，这样的结果是不好的，不仅没有解决问题，还可能会引起新的问题。怎样成为自己情绪的主人呢？只有知道怎样调整自己的情绪，才能成为情绪的主人。大家还记不记得我们调整情绪的四个方法啊？非常好！所以我

们所以自信式沟通第一步就是：做自己情绪的主人。

### 3. 讨论自信式沟通第二步：自信的身体语言

1) 组长让两个同学体验蹲着和站着跟对方说话，讨论体验和感受。

现在我请两位同学出来我们来玩个游戏哦，一位同学站起来，另一个同学蹲下来，这时站起来的同学欺负了蹲下来的同学，我们看看蹲下来的同学是如何跟对方说的？嗯，现在我们给蹲下来的同学一点力量，让他站起来，让他再跟对方说一次，看看他会如何说？两次不一样在哪里呢？哦，对，他站起来变得有自信了，目光和语气如何？对，目光是看着对方，语气变得很坚定。

2) 示范自信的身体语言。姿势：身体站直，眼神接触：目光平视对方，语气坚定而友好。

你能跟我一起做吗？站起来，挺起肩膀，向后，很挺拔的站着（示范，请同学跟着做）。当你这样站的时候，你感觉怎么样？（鼓励回答）你觉得更有信心了吗？

（先示范没有眼神接触：完全回避或大多数时间看其他地方，然后示范自信的眼神接触：大多数时间保持眼神接触，避免紧紧的盯着）可以跟我一起做吗？

（示范怯懦的声音，然后示范洪亮清晰的声音）哪一个声音听起来更自信？

### 4. 讨论自信式沟通第三步：尊重平等

1) 播放视频《谁都是平等》

大家觉得老大和老三有什么不同的感受？嗯，老三让小光觉得很理解他，并且不会因为他做错事而攻击他，这样就是很尊重他，并且是平等的。对人尊重、平等是怎么样的？平等是什么意思呢？我们看看智者是怎么看待平等的。

2) 讨论什么是平等

对，不管我们是从哪来，身形是怎样，家庭情况是怎样，不管对方做什么，我们都能跟所有人互相尊重，和谐相处。人是因为行为而尊贵。所以自信沟通第三步是：尊重平等。

### 5. 讨论自信式沟通第四步：“我”的表达

示范“我”的表达方式，健康的表达自己的感受，同时表现自信。在黑板上写下：“我”的表达 = 描述事件+我的感受+积极建议。

我们再看看老二跟老三的沟通方法有什么不一样？当时老二有什么感受呢？（内心知道摔坏花瓶后果比较严重，但是却怕失去小光这个朋友而不敢表达）嗯，老三不会委屈自己的情绪而只让对方好而说话，这样老三和老二不同的地方就是有自信。所以良好的沟通方式的第四步就是：用“我”的表达方式。我们看看老三的话，他的话第一部分是“哦，花瓶不小心打破了”这是在说什么呀？这是事件的描述对不对？然后第二部分说了什么呢？是“我很害怕妈妈会来回很伤心”这是我的情绪，最后部分“我们一起把碎片收好，等妈妈回来我们一起认错”，这样的结果好不好呢？好，这是积极的选择。所以三个部分加起来就是：事件+我的情绪+积极的选择。好，到现在为止，我们已经学习了自信沟通四部曲。休息 10 分钟后，我们回来就要实战啦，看看如何做一个沟通小能手！

### 三、主题活动《我是沟通小能手》（30 分钟）

#### 1. 分小队

每个小队 2-3 个人（根据实际人数而定）

#### 2. 派发活页《我是沟通小能手》问题情境

分给每个小队活页《我是沟通小能手》问题情境

#### 3. 组长和助手表演情境 1

#### 4. 组员头脑风暴

如果你遇到了这样的情况，你会怎么处理呢？记得要用我们刚刚学会的自信沟通四部曲啊！好现在给每个小组 5 分钟，一起讨论如果你是小猪老大，你会怎么做？然后写在老师发给你们的活页纸上。一会儿老师会邀请每一组派代表表演出来。

表演时有两种选择：1、请每个小队派一个代表和副组长一起表演；2、请每个小队两个同学一起表演。具体方式视组员的表演能力选择。

#### 5. 组员表演

每个小队都要派两个人一起表演出你们的解决方法。谁先来表演呢？

#### 6. 组长和助手表演情境 2

#### 7. 组员头脑风暴

#### 8. 组员表演

### 四、总结和任务布置（15 分钟）

#### 1. 组员分享

组长问同学今天印象深刻的地方，对于讲的好的，给予爱的鼓励

#### 2. 组长总结

1) 自信式沟通四部曲：做情绪的主人、自信的身体语言、尊重平等、“我”的表达

2) “我”的表达 = 事件 + 我的感受 + 积极建议

3) 强化主题句“自信沟通四部曲，我是沟通小能手”，发给主题贴纸。

#### 3. 印花奖励

#### 4. 布置心理弹性练习



**附件 4-1 《我是沟通小能手》活动活页（组长需打印）**

|                                                                                               |                                                                                                                   |
|-----------------------------------------------------------------------------------------------|-------------------------------------------------------------------------------------------------------------------|
| <p>1、小猪老大在学校遇到一件让它很恼火的事情，它的同学小猴老叫他“蠢猪”。老大每次听到都特别的生气，跟他吵起来，甚至还打架。如果你是老大，你会怎么反应来避免跟小猴发生冲突呢？</p> | <p>2、小猪老二在班里没有什么好朋友，它很想跟别的同学一起玩，但是每次它想加入同学们的时候，它的同学都会冲它说：“我妈妈说你很脏，不能跟你一起玩，离我们远点！”老二一听就低下头伤心地走了。如果你是老二，你会怎么反应？</p> |
| <p>如果我是老大的话？我会：</p> <p>第一步：</p> <p>第二步：</p> <p>第三步：</p> <p>第四步：“我”的表达</p>                     | <p>如果我是老二的话？我会：</p> <p>第一步：</p> <p>第二步：</p> <p>第三步：</p> <p>第四步：“我”的表达</p>                                         |
| <p><small>发生了什么事？描述给对方听</small></p> <p>我感觉/觉得/我的心情_____</p> <p>我希望_____</p>                   | <p><small>发生了什么事？描述给对方听</small></p> <p>我感觉/觉得/我的心情_____</p> <p>我希望_____</p>                                       |

## 组员日记本 4-1 心理弹性练习第四次《我的选择》

### 第四次

如果你被同学起外号，你可以怎么做？请圈出来。

1. 哭，离开现场
2. 告诉他不要再这么做
3. 装出你不在意，还继续跟他玩去
4. 找老师
5. 自信地站直身体，看着对方，温柔坚定的告诉：“你我听了很难过，不喜欢被叫外号，如果你叫我的名字，我会很开心！”
6. 什么也不做
7. 大声的责备他，打他

请你描述这个星期中你遇到的一个与同学或朋友发生的不愉快的事情，然后写出你是如何处理这件事的，结果如何？

|       |         |
|-------|---------|
| 不愉快的事 |         |
|       | 处理事件的经过 |
| 结果    |         |

## 第四次 沟通小能手

# 第五次 爱的连结

## 主题口号

家人沟通需要“爱”，我为家人负责，我为自己负责！

## 活动理念

本次活动的主题依然是是自信的沟通，问题情境从学校转移到家庭。学习如何与自己亲近的人建立爱的连结。

## 活动目标

1. 复习自信式沟通的四个步骤
2. 学习“爱的自信式沟通”
3. 在典型与家长的压力事件中练习“爱的自信式沟通”

## 活动流程

|               |                                                        |       |
|---------------|--------------------------------------------------------|-------|
| 一、回顾          | 1、打招呼<br>2、唱组歌<br>3、热身活动《拇指传情》<br>4、回顾心理弹性练习           | 15 分钟 |
| 二、主题活动《爱的沟通》  | 1、播放视频《被骂了》，分析原因<br>2、自信+爱的沟通<br>3、角色扮演                | 30 分钟 |
|               | 休息一下                                                   | 10 分钟 |
| 三、主题活动《我的家人》  | 1、画家人一幅画<br>2、轮流分享<br>3、组长总结<br>4、播放《感恩的心》             | 30 分钟 |
| 四、总结与布置心理弹性练习 | 1、组员分享印象深刻的地方<br>2、组长总结，发给主题贴纸<br>3、印花奖励<br>4、布置心理弹性练习 | 15 分钟 |

## 所需材料

1. PPT\_5, 笔记本电脑, 投影仪, 音箱, 小组规则海报, 印花贴纸, 水彩笔 10 套, 胶水、胶条, 奖品五种, 玩偶灰太狼
2. 主题砖头贴纸 10 张

**爱的连结**  
家人沟通需要“爱”!

3. 视频 9-1 《被骂了》
4. 音频 9-1 《感恩的心》
5. 事情境卡片 10 张（半张 A4 纸大小）
6. 10 张 A4 纸（供画画使用）
7. 组员日记本  
5-1 心理弹性练习第六次《写给父母的一封信》

## 活动方案

### 一、回顾与热身（15 分钟）

1. 唱组歌
2. 回顾活动
  - 1) 请组员分别分享自己的心理弹性练习。
  - 2) 请小组同学朗读你成功日志上的一项。
  - 3) 组长总结, 并记录组员印花单。
  - 4) 组长回顾上一次活动并引出本次活动主题。
3. 热身活动《拇指传情》。

两两一组, 互相之间不能说话, 要把手握住只留下大拇指碰对方大拇指, 将眼睛闭上, 在不讲话的情形下相互透过手指告诉对方你今天的心情。然后睁开眼睛核对是否正确了解了对方的心情。(做完之后总结) 刚才做闭眼沟通活动的时候, 有的组相当快就了解了对方的心意, 有些组则没有办法沟通。看来沟通的时候, 我们有时候会误会别人, 这就需要澄清, 另外沟通包括两方面的内容, 有语言方面的, 还有非语言方面的。所以我们要通过对方的表情、动作来了解对方的心情。

### 二、主题活动《爱的沟通》（30 分钟）

#### 1. 引言

组长提出, 除了跟同学同伴发生不开心的事情之外, 有时我们也会和家长、老师有些不愉快的经历, 带领同学分享一些经历, 讨论被骂或被说的原因, 和感受

有时候我们会跟我们关系很密切的人发生不开心的事，发生了冲突，大家的经验是怎么样？当时你是怎么跟他们说的呀？大家觉得我们被父母和老师责骂的原因是什么呢？

## 2. 播放视频《被骂了》

带领组员共同分析主人公被家人骂的原因。

咱们一起看看《被骂了》，主人公跟我们一样受父母责骂，她遇到被妈妈骂的压力。你是她会有什么感觉呢？你觉得主人公会有什么想法？可能会想：妈妈骂我，因为我很讨厌，我做错了。大家怎么看她这个想法？会有什么结果？嗯，这是消极的想法，那我们要把消极转成积极，要用到什么方法呀？对积极剑客，我们现在试试用“事实”剑客来看看真实情况是怎么样好不好？我们看看受责骂的原因都是什么呢？哦，大家觉得主人公发生了什么事？嗯，为什么会被骂呢？嗯，姐姐因为要复习，所以让弟弟去煮饭，比较危险。还有其他原因吗？嗯，妈妈之前得到一个不好的消息，心情很不好。所以主人被妈妈骂是完全是自己的原因吗？有自己的原因，同时也有妈妈的原因。那我们怎么理解被骂这件事呢？妈妈内心是因为担心姐姐，这是出于很伟大的部分--“爱”。所以我们将“觉得我最讨厌，我全错了”消极想法转化成“妈妈因为担心我出事，所以很大声的说我”。大家有没有跟主人公类似的经历呢？当时你是怎么想的？经过“事实”剑客支持之后，你会怎么做呢？你会跟妈妈说些什么呢？

## 3. 讨论如何沟通

如果你是主人公，你会怎么和妈妈沟通呢？同学们还记得自信式沟通的四部曲吗？首先要控制自己的情绪，不能因为被骂了很生气就和父母顶嘴，然后要站的稳，表达清晰，尊重对方的感受，这里妈妈的情绪是什么？妈妈为什么会有这样的情绪？因为很爱他们俩，怕他们受伤。最后要用“我”的表达方式。（描述事件+我的感受+爱+积极建议）。“我为了忙着复习，让弟弟去煮饭，是比较危险（描述事件）+我觉得很羞愧（我的感受）+我知道妈妈在意我们，不希望我们出事（爱），我希望妈妈可以不要那么生气，下次可以好好跟我说”（积极建议）。大家发现这个比上一次学的沟通方式有什么不同？嗯，多了“爱”，大家听到这个部分有什么感觉呢？我们对重要的人，爸爸妈妈我们只用“我”的沟通方式不够哦，还用“爱的沟通”。我们今天又学会了一个新的方法，就是自信沟通的基础上，还要听到对方的感受，理解家长老师有时候发脾气也有自己的原因，可能有大人们自己不开心的事情，由于在意我们，有时他们也会用很急躁的方式骂我们。因为他们没有大家那么幸福，可以有机会参加这样的活动，大家信心可以跟他们表达爱吗？有过什么类似的经历吗？我们可以用自信的爱的沟通告诉他们你懂他们的爱，他们的感受，让他们明白你希望他们用什么样的方式来对待你。

## 4. 练习自信+爱的沟通

首先，请每个人回忆一件自己被家长或老师责骂的事件，然后把这个事件写出来，用某种颜色的笔来写，代表当时的心情，不用写自己的名字。

把大家的冲突小纸条放在小盒子中，组长邀请组员在盒中随机抽出一个冲突事件，邀请他对模拟在冲突事件下进行爱的沟通。邀请的组员数视时间多少灵活掌握。

# 三、主题活动《我爱我的家人》（30分钟）

## 1. 组员画我的家庭美好时刻

请你画一幅自己的家庭最美好的事情，美好的画面，在你作完画之后将由你把你的家人介绍给大家，主要是包括她们是谁？在哪儿？在做什么？哪些地方不懂，请举手发言。没有问题的话，

请保持安静，认真作画。（同学们作画，组长和助手在教室中巡视，及时为有疑问的同学解答。若同学们有某些画不出来的地方，可以用汉字或拼音替代）

## 2. 作品分享

请同学们分享自己的图画，并按照这个顺序给大家讲解你的图画。首先图画上的人是谁？让后再讲他们在做什么？讲这些家庭成员对于家庭的重要作用？他们做过什么让你影响深刻，你觉得做感动？在你的记忆中，你和家人最好美好的时光是什么时候？谈一件你和家人相处时，感觉最高兴的事情是什么？大家听明白了吧？

（助手发给事先准备好的提纲，同学们可按照这个顺序分享自己的图画。待大家都明白之后，开始分享活动。）

（分享过程中，当每个同学轮流发言时，其余同学认真的听，组长若是有不理解，可以适当的提问。若同学们漏掉需要说明的问题，组长为发言同学提醒。若是某些孩子回避不愿回答的问题，不再做追问和深究。若某些学生出现严重情绪问题，比如，哭泣，不要立即制止，待情绪稍有缓和的时候，可带动其与同伴给予其安慰和鼓励。每个同学发言结束，带领大家给他爱的鼓励。）

## 3. 组长总结

从今天的分享活动中，可以看出家庭对于我们每个人来说都是很重要，每个家庭成员对于家庭都有着很重要的责任，我们自己对于家庭也有一份重要的责任，现在我们就是好好学习知识，增强生活的能力，使自己敢于面对现实，让自己变的更加坚强，将来承担起自己对家庭的责任，不辜负父母对我们的关爱和期望。

## 4. 播放《感恩的心》

组长带领同学们一起唱感恩的心，通过歌声，我们把爱心融入音符之中，表达到爱我们的人的心弦里。

# 四、总结和任务布置（15分钟）

1. 组员分享印象深刻的地方。

2. 组长总结。

1) 自信式沟通四部曲：管理情绪、目光坚定、尊重平等、“我”的表达

2) 自信+爱的沟通 = 描述事件 + 我的感受 + 对方感受 + 积极建议

3. 发给贴纸：**我为家人负责，我为自己负责，我为爱负责！**

4. 组长总结今天同学的表现，表扬做的很好的地方，对主动参与活动的孩子奖励一个印花。

5. 布置心理弹性练习（组员日记本 5.1 《心理弹性练习第四次：写给父母的一封信》）

在今天的活动中，大家表现的都很好，认真的完成了所有的任务，我和大家一样感触很深，活动就要结束了，请把你做的画交上来，我们会替你好好保存。还有一个小小的作业需要大家完成，请你给父母写一封信，写出你想给他们的话。（组长和助手收回同学们的画，并且发给同学们信纸（组员日记本 5-1）

## 第五次 爱的连结

亲爱的爸爸妈妈，

我有好多话想跟您说



The page contains a series of horizontal lines for writing. The first line is pre-filled with the text '亲爱的爸爸妈妈，' and the second line is pre-filled with '我有好多话想跟您说'. The remaining lines are blank. There are several small flower icons scattered throughout the page, some on the lines and some in the margins.

# 第六次 我的支持环

## 主题口号

爱是可以传递的，彼此支持，温暖你我！

## 活动理念

社会支持是滋养心理弹性的重要资源。本次课的主旨是要组员意识到自己身边有资源可用，自己也可以成为支持别人的宝贵资源。

## 活动目标

1. 了解到遇到困难可以彼此支持，爱是可以传递的
2. 认识到自己身边的资源并学会运用这些资源

## 活动流程

|                 |                                                                          |       |
|-----------------|--------------------------------------------------------------------------|-------|
| 一、回顾            | 1、打招呼<br>2、唱组歌<br>3、热身《大风吹》<br>4、回顾心理弹性练习                                | 15 分钟 |
| 二、主题活动《爱是可以传递的》 | 1、引言<br>2、视频播放《爱是可以传递的》（前半段）<br>3、组员分享<br>4、视频播放《爱是可以传递的》（后半段）<br>5、组长总结 | 30 分钟 |
|                 | 休息一下                                                                     | 10 分钟 |
| 三、主题活动《我的支持环》   | 1、引言<br>2、组员画《我的支持环》<br>3、组员分享作品<br>4、温暖小游戏总结                            | 30 分钟 |
| 四、总结与布置心理弹性练习   | 1、组员分享印象深刻的地方<br>2、组长总结，发给主题贴纸<br>3、印花奖励<br>4、布置心理弹性练习                   | 15 分钟 |



## 所需材料

1. PPT\_6, 笔记本电脑, 投影仪, 音箱, 小组规则海报, 印花贴纸, 水彩笔 10 套, 胶水、胶条, 奖品五种, 玩偶灰太狼
2. 主题砖头贴纸 10 张

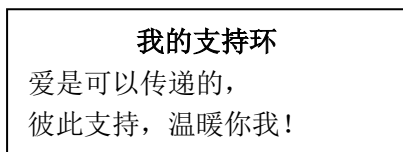

3. 视频 6-1 《爱是可以传递的》
4. 组员日记本
  - 6-1 《爱是可以传递的》
  - 6-2 《我的支持环》
  - 6-3 《我的资源森林》

## 活动方案

### 一、回顾及热身（15 分钟）

1. 打招呼
2. 热身活动《大风吹》

今天, 我们大家来做一个游戏, 名字叫“大风吹”, 今天参加活动的一共有  $n$  个人, 那么我们就排  $n-1$  个凳子, 其中一个人站在中间, 说大风吹, 其余的人坐在凳子上, 然后问: “吹什么?”, 站在中间的人就喊, “吹, 吹, 吹戴眼睛的人 (或者吹长耳朵的人, 吹穿运动鞋人... 注意: 必须有两个或者两个以上坐在凳子上的人符合这些条件)” 然后, 符合条件的人, 必须要站起来, 抢另外一个凳子做, 符合条件的一定要换, 不符合条件的一定不能换抢不到凳子的人就站在中间, 继续吹。好, 我们开始游戏。

3. 回顾活动

- 1) 请组员分别分享自己的心理弹性练习。
- 2) 请小组同学朗读你成功日志上的一项。
- 3) 组长总结, 并记录组员印花单。
- 4) 组长回顾上一次活动的重点内容 (自信+爱的沟通, 给父母的一封信)。

### 二、主题活动《爱是可以传递的》(30 分钟)

1. 引言

通过前面这么多次和大家相处，我发现你们真的很棒！学会了各种提高自己心理弹性的办法，都有什么高招啊？对，积极三剑客、情绪调整法（小猪调整法）、自信沟通、我的表达。哇，学会了这么多方法，希望大家可以把这些方法用到生活中，帮助自己应对生活中的各种困难。虽然我们的心已经像“打不倒的灰太狼”一样强大无比了，但是生活中还是会有一些事情，我们会“陷”在里面，觉得就在没有月亮的夜里走路，看不到方向，看不到希望，会伤心难过。同学们有没有这样的时候呢？[请同学举例说明]今天，小明同学[以下播放视频的主人公]也遇到了这样的问题，他性格内向，在学校里没有朋友，同学们都不喜欢他。大家一起来他面对的问题[播放视频]。

## 2. 播放视频《爱是可以传递的》前半段

[1:32]处停

## 3. 组员填写活页

小明遇到了什么事情？他的心情怎样？你能找到什么样的词来描述他的心情？如果你是小明，你会怎么样做？可以用到我们之前学的方法吗？你希望别人怎样做？如果你是小明的同学，你可以怎样帮他？请大家把你想到的方法填在组员日记本6-1页上。

## 4. 组员分享

大家做的真不错！办法很多！[给予恰当的鼓励]下面我们来看看他的同学小彬是如何支持他的？

## 5. 播放视频《爱是可以传递的》后半段

## 6. 组长总结

或许你身边也存在某些人，他们正默默承受痛苦，而我们正在视而不见，一个人被别人伤害，也许他是无辜的，也许是他自己犯了错。即使曾经犯过错的人，也需要重来一次的机会，没有人会从来不犯错。所以，不管事情到底为什么发生，假如我们有能力，为何不试着伸手拉别人一把，所以，**爱是可以传递的，你帮助我，我帮助你，生活中的很多难题就会迎刃而解了。**休息一下，我们回来做一个好玩的游戏。

# 三、主题活动《我的支持环》（30分钟）

## 1、引言

每个人身边都有一些爱你的人，如果你发生了什么事情，他们会关心、同情、帮助你，如果你的问题解决了，他们会为你开心。当你需要倾诉的时候，他们会愿意听你诉说，当你需要帮忙的时候，他们会伸出援手。他们可能是你的亲人、朋友、老师或者其他对你来说很重要的人，而且他们和你的亲疏远近关系不同，能帮你的事情也不同，有些人会一直在你身边支持你，有的人可能在某件事上对你有帮助，或在某个时间对你有帮助。

## 2、组员画《我的支持环》

好，请大家拿出纸和笔，在正中央画个小圆圈，写的下自己的名字即可，不用太大。

大家可能已经知道下一步要做什么了吧。对，请在第一个环中郑重写下自己的姓名。这是我们

的小小地球，里面有我们的所有小秘密。来，跟老师一起画同心圆，一二三四（四个环）。（随机抽取一位同学）“能告诉我你有自己喜欢的偶像吗”“为什么喜欢”，给予回应，并引出偶像环。

**在偶像环中作小太阳标志：我们的偶像，如太阳般瞩目，散发着耀眼的光芒，虽然，我们无法触及，但他的品质亦或是魅力，却深深的影响着我们。请在第五个环中写下你的偶像的名字。**

李白曾有诗曰：“举头望明月，低头思故乡”乡，即家也。如果说偶像是可望而不可即的，那么，我们身边的家人和亲朋则是最真切温暖的。请将最靠近我们自己的第二个环做上小月亮的标记。那里是我们最最亲密的人，他们如月光，在漆黑的夜晚给予我们光明、希望。请在第二个圈中写下我们最亲密的人或东西的名字。（选择答案比较特殊或别致的学生进行提问，并给予恰当的回答）**小结语：是啊，这些人给我们的是真真切切的温暖，是我们的精神支柱！**

（从父母之爱深沉厚重，引向轻松）请大家闭上眼睛，想象：春天已悄然降临，春姑娘绿了大地、红了桃花，你和同学、伙伴们在茵绿的草地上尽情奔跑、欢笑，那么，是谁和你在一起呢？儿时的伙伴吗？一起吃饭、读书、逃课的同学吗？好，睁开眼睛，在第三个同心圆中写下你最重要的朋友的名字，并画上小桃心，以示和他们心连心。他们曾在你最无助时给了你帮助，哭泣时给你大大的拥抱，他们顽皮却可爱。**小结语：和朋友在一起，我们充满激情，悲伤时一起哭泣，高兴时一起大笑。**

如果说朋友是青春的、嫩绿的，那么生活便是五彩缤纷的，不仅有艳丽的彩色，更有暗淡的灰白，但那些我们遇到的人，却帮助过我们，教会过我们，在最后一环中做一个你认为可以代表你所生活的样子的小标记，写下那些你可能并不熟悉，却给予你支持和帮助的人们的名字或名称，因为或许他们就像雷锋叔叔一样，并不曾留下姓名。请在第四个环中写下这些你身边曾经帮助过你但又不那么亲密的人的名字，比如给你看病的医生，你的邻居，村长，你的理发师等等。**小结语：是啊，生活中，无论是我们彼此熟悉的还是陌生的，看到他们，我们都会会心微笑！**

数一下这些给予我们物质或是精神上帮助的人共有多少。有这么多人曾经或是现在正在帮助或支持我们，是不是一件很幸福的事情？（时间允许可以涂颜色）

### 3、组员分享

请组员分享看到自己作品的感受。组长可以问一些具体的问题：

- 1) 你遇到难过的事情，可以找谁去倾诉？
- 2) 你遇到无法解决的生活难题，可以找谁去帮助？
- 3) 如果你取得了一个好成绩，你最想告诉谁，分享给谁？

### 4、组长总结

**温暖小游戏：**引导学生愿意传递出去，帮助和支持他人。——用行动来表达爱心支持（温暖小游戏）。

请如小猪放松法，搓搓手—温暖脸颊—将温暖传递出去：依次将手握住身边的同学（不要一起，一个连一个会更好）**小结语：爱心和力量是可以传递的。**

接受帮助、得到别人的支持，并将此传递出去，给予他人支持，我们的支持环才可以长久绵延下去，爱心才能得以传递！**爱是可以传递的，彼此支持，温暖你我！**

## 四、总结与任务布置（15 分钟）

### 1. 组员分享

组长问组员今天印象深刻的地方，对于讲的好的，给予爱的鼓励。

### 2. 组长总结

1) 爱是可以传递的，彼此支持，温暖你我(砖头贴纸)

2) 每个人都有一个支持环，当遇到问题时，我们可以求助身边值得信任的人

### 3. 印花奖励

组长总结今天同学的表现，表扬做的很好的地方，对主动参与活动的孩子奖励一个印花。

### 4. 布置心理弹性练习

请组员打开日记本 6-2:《心理弹性练习第六次：我的资源森林》，讲解如何做这个练习。

如果你是小明，  
你会做什么  
让自己不那么  
难过？

可以请积极三剑客帮忙吗？怎样做

可以用四种情绪调整方法吗？怎样做

可以做个沟通小能手，用“我”的表达吗

我还可以

---

---

如果你是小明  
的同学，你可  
以怎样帮助他  
？

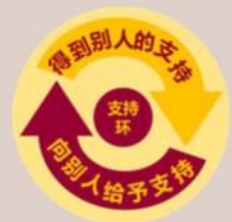

**爱是 可以传递的**

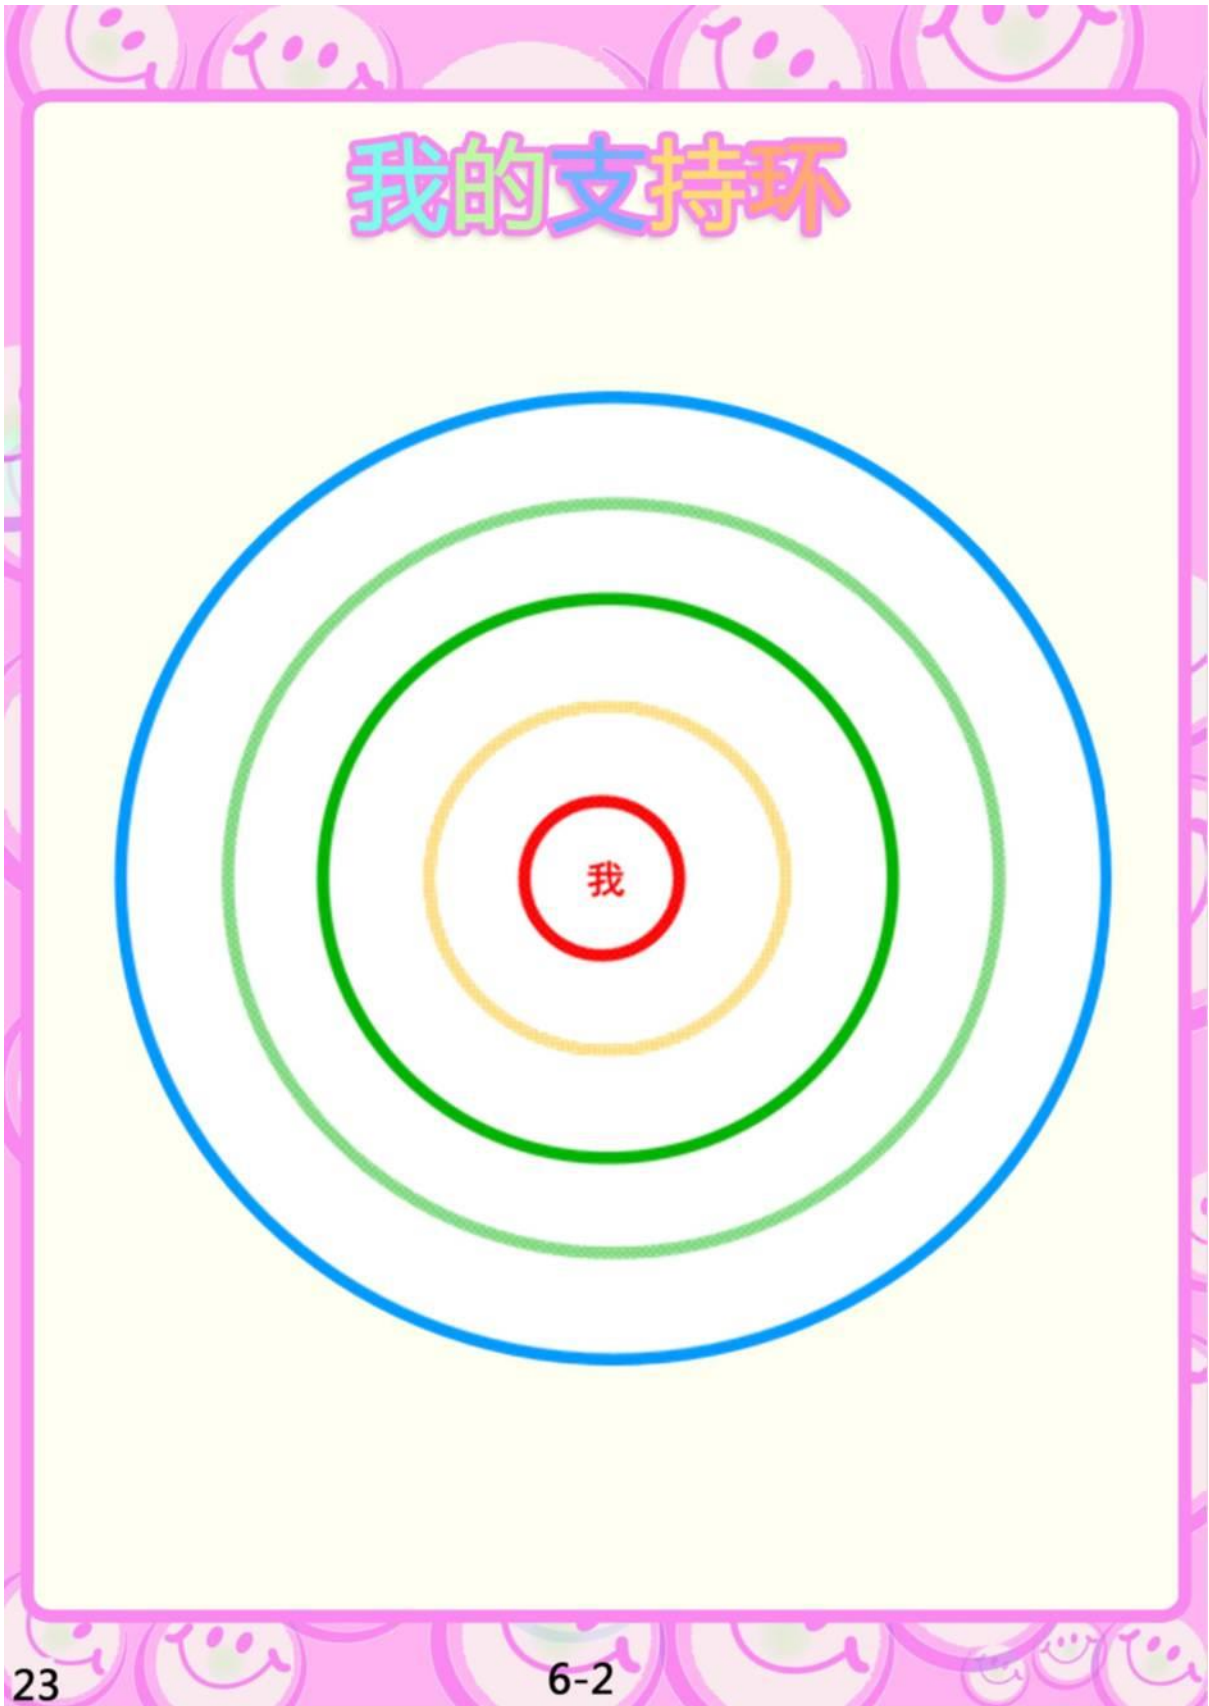

## 第六次 我的资源森林

请你想想最近你遇到的一个困难，需要别人帮助才能解决，这个困难是

看看你可以找谁来帮助你，至少想出五个人，尝试去找他们帮忙，然后让他们在你的资源森林里签名。

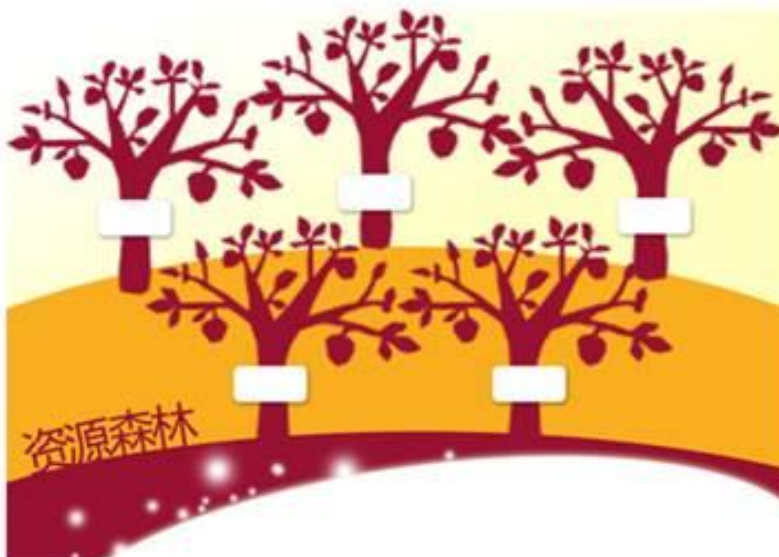

你觉得上面五个人谁帮你最多？

如果没解决，你觉得还可以找谁帮忙？

# 第七次活动 问题解决秘籍会

## 主题口号

问题不是问题，积极解决才是道理！

## 活动理念

针对孩子们最关注的问题，用小组同学的智慧解决问题。问题可以包括学业上、同伴关系中、与家长老师的关系、以及各种成长问题。本次活动的目的在于让孩子们练习综合运用前几次所学到的积极自我对话、情绪管理、沟通技能及周围的资源来解决生活中最关切的问题。

## 活动目标

1. 复习及使用以往几次活动所学的认识、情绪、沟通技能
2. 了解到某些问题在小组成员中的共通性，自己不是独自面对问题
3. 面对问题，可以选择积极的解决方案

## 活动流程

|                 |                                                        |       |
|-----------------|--------------------------------------------------------|-------|
| 一、回顾            | 1、打招呼<br>2、唱组歌<br>3、热身游戏《买苹果》<br>4、回顾心理弹性练习            | 15 分钟 |
| 二、主题活动《问题解决秘籍环》 | 1、组长讲解<br>2、组员分享                                       | 30 分钟 |
|                 | 休息一下                                                   | 10 分钟 |
| 三、主题活动《问题解决秘籍会》 | 1、分两组，每组出一个问题情境给对方<br>2、各组为对方讨论解决方法<br>3、评估对方解决的方法     | 30 分钟 |
| 四、总结与布置心理弹性练习   | 1、组员分享印象深刻的地方<br>2、组长总结，发给主题贴纸<br>3、印花奖励<br>4、布置心理弹性练习 | 15 分钟 |



## 所需材料

1. PPT\_7, 笔记本电脑, 投影仪, 音箱, 小组规则海报, 印花贴纸, 水彩笔 10 套, 胶水、胶条, 奖品五种, 玩偶灰太狼
2. 主题砖头贴纸 10 张

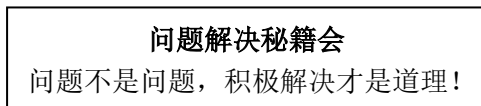

3. 附件 7.1 主题活动活页《问题解决秘籍会》(5 张)
4. 组员日记本  
-7-1 《问题解决英雄录》

## 活动方案

### 一、回顾及热身（15 分钟）

1. 打招呼
2. 热身活动《买苹果》

组长介绍游戏规则：接下来我们来玩一个游戏，叫做《卖苹果》，在这个游戏中，老师来卖苹果，你们所有人一起来买苹果。怎么买呢？其中需要 1 个同学当五块，4 个同学当一块钱，2 个同学当五毛钱。开始买苹果的时候，你们一起问老师，“苹果一斤多少钱？”老师说出一个价钱时，小组成员需要在最短的时间内凑齐这个钱数，站出列举起手靠在一起。比如一斤五块钱，那么可以一个五块钱站出来举起手，也可以 4 个一块钱和 2 个五毛钱站出来举手靠在一起。如果全组所有人的钱加起来都不够买一斤，组员就一起说“太贵不买了”。（老师注意报数不要报五毛以下的非整数）

3. 回顾活动
  - 1) 请组员分别分享自己的心理弹性练习。
  - 2) 请小组同学朗读成功日志上的一项。
  - 3) 组长总结，并记录组员印花单。
  - 4) 组长回顾上一次活动的重点内容（爱可以传递，我的支持环）并引出本次活动主题。

### 二、主题活动《问题解决秘籍环》（30 分钟）

1. 引言

时间过得很快，我们的心灵之屋还有多少块砖头没贴上去呢？大家还记得上一次的砖头告诉我们什么吗？今天我们就要贴上我们的第七块砖头了（副组长派发砖头），我们今天的活动是

——“问题解决秘籍会”，在今天的活动中，我们会讨论一些生活中遇到的问题，需要我们齐心协力，发挥我们的智慧，一起把这些问题打倒！前面我们已经学习了自信沟通，情绪调整法等处理问题的方法，相信大家现在已经不怕问题了，今天，我们一起收集更多的问题解决的“武林”秘籍。

我们在生活中难免会遇到各种各样的问题，例如学习很努力但是成绩还没进步，考试不好被爸妈责骂，被朋友误会等等，大家想想，在你的生活中遇到过哪些问题让你生气难过或苦恼，遇到这些问题的时候，你们一开始会怎么做呢？这么做会发生什么事情？结果是什么？（如果组员提及用前面学到的沟通和情绪处理技巧去做，组长要及时肯定）

## 2、组长讲解《问题解决秘籍环》

[在介绍小专家的特点时分步介绍，即把问题解决环逐个拆开，直到最后再呈现整个问题解决秘籍环]

我们一起来看看问题解决小专家是怎么解决问题的。小专家在学习了前面的内容后，他自己发明了一个法宝，让他遇到问题的时候能够很好地解决。这个法宝就是“问题解决秘籍环”，在这个环上一共有四个秘籍招术，我们现在就一个一个来看，有些是大家以前就学到的哦！

## 3、秘籍一：冷静下来想办法！

[组长请引导同学回忆，并用四种情绪管理的方法和三个积极剑客来帮助小专家]

有一天，小专家的妈妈生病了，小专家的爸爸在外打工，小专家每天得照顾妈妈，还得安排学习时间，学习退步了，期末考试成绩很差，他很想照顾妈妈的同时让自己的恢复到原来的水平。请问小专家遇到什么困难了？面临的问题是：**学习退步，怎样才能边照顾好妈妈又能不影响学习**。很好！遇到这个问题的时候，我们一般会有什么感觉呢？（可能会苦恼，担心，紧张，生自己的气）你们遇到过这样的问题吗？会怎么想啊？（我真没用，连这两件小事都做不好！完蛋了，我的学习成绩永远上不去了！）看来大家都非常理解小专家。老师提示一下大家，我们的秘籍一是以前学过的哦，看看大家能不能想起来！（调整情绪和想法：小猪放松法，积极剑客）。我们的第一秘籍就是要：**冷静下来想办法！**

## 4、秘籍二：找人聊出好办法！

大家想知道第二秘籍是什么吗？如果我们想到一些方法，但是不知道哪些方法更好的时候，可以做什么呢？（嗯，可以找家人、老师或者朋友商量哪种方法更好。看来大家也有了第二个秘籍——**支持环**）。这时候小专家拿着写下来的方法去找了他的朋友明明和亮亮，他们几个头脑风暴之后，分析各种方法的好坏之后，三个人一起想出一个很好的方法，就是列出一个计划表，把每天要照顾妈妈和学习的时间都安排出来，然后按照计划表去实行，而明明和亮亮也会抽时间过来跟小专家一起复习功课。

## 5、秘籍三：积极行动最重要！

那有了办法之后，接下来需要做什么呢？小专家的第五个秘籍就是——**行动**。大家听说过加菲猫吗？加菲猫整天喊着要减肥，要做俯卧撑，但是它都是今天俯，明天撑，永远都没有行动，所以他一直都没有减肥成功。所以想法只有通过行动才能实现。大家千万不要做加菲猫噢！

我们来看看小专家尝试了他们一起讨论出来的办法后结果会怎样。这个办法不仅让小专家能够很好地照顾妈妈，他的学习成绩也并没有下降，而跟明明和亮亮的关系也更好了。

#### 6、秘籍四：效果不好再来过！

不过有时候我们不一定能一下子就解决问题，如果行动后发现结果还不是很好，这个时候我们要有坚持下去的勇气，像灰太狼学习，勇敢的面对问题。

#### 7、组员分享

大家觉得问题解决环怎么样？在你的生活中，哪些时候可以用到问题解决环的秘籍呢？你最喜欢哪一件秘籍？为什么？

[组长稍作总结后，休息 10 分钟]

## 三、主题活动《问题解决秘籍会》（30 分钟）

### 1、引言

我们有了这四个秘籍，不仅能解决自己的问题，还能帮别人解决问题。在这个活动中，我们要分成 2 个小组，每个小组都讨论出曾经遇到的一个困难的事情，然后请另一个小组的小专家们用秘籍帮忙提供解决的方案，看看哪种方法最能帮助这个小组解决问题。

### 2、分组讨论问题

《桃花开》分成五人的两个小组，请组员在 5 分钟内讨论出一个常遇到的问题情境[如可行请组长或副组长分别表演出着两个问题情境，呈现给所有孩子；如果孩子表演能力比较强，也可以让孩子表演]

### 3、组员讨论问题解决秘籍录

1) 讨论。两个小组交换问题情境，利用问题解决秘籍环帮另一个小组解决那个问题。副组长给每个小组发放问题解决秘籍录（附录 7.1），请小组讨论后记录下解决这个困难需要的步骤，最后确定最好的办法，交给对方小组。

2) 呈现。小组讨论确定最佳方法后，请各小组派代表在大组中分享他们是如何运用问题解决秘籍环来解决另一个小组的问题的，结果得出什么好方法？这个好方法是怎么出来的？预期会出现什么结果。

### 4、组员评估对方的方法

组长可询问，被帮助的小组看到对方这么认真地帮忙解决问题，感觉如何？觉得他们提供的方法怎么样？最喜欢哪个方法？组长鼓励队员之间的互相尊重、互相帮助。

### 5、组长总结

## 四、总结与任务布置（15 分钟）

1. 组员分享印象最深刻的地方
2. 组长总结。

- 1) 四个秘籍是：冷静下来想办法，找人聊出好办法，积极行动最重要，效果不好再来过。
  - 2) 遇到相同的事件，每个人会有不同的解决方法
  - 3) 解决方法的原则是：不产生其他新问题、积极的解决现在的问题。
  - 4) 今天问题解决会的砖头告诉我们“**问题不是问题，积极解决才是道理**”，回去把砖头贴到心灵之屋上，期待下一次的砖头。
3. 组长总结今天同学的表现，表扬做的很好的地方，对主动参与活动的孩子奖励一个印花。
  4. 布置心理弹性练习（组员日记本：问题解决秘籍录）

### 附件 7.1 主题活动活页《问题解决秘籍录》

对方小组的问题是：

第一个秘籍是：冷静下来想办法！都有哪些方法可以冷静下来？

- (1) \_\_\_\_\_
- (2) \_\_\_\_\_
- (3) \_\_\_\_\_
- (4) \_\_\_\_\_

第二个秘籍是：找人聊出好办法！我们小组经过讨论，想出了下面的几个办法

- (1) \_\_\_\_\_
- (2) \_\_\_\_\_
- (3) \_\_\_\_\_
- (4) \_\_\_\_\_

我们觉得办法（ ）最好，最能帮到对方小组！

第三个秘籍是： \_\_\_\_\_

第四个秘籍是： \_\_\_\_\_

# 问题解决英雄录



描述一个过去几周里，你遇到的一个需要解决的问题。  
找出至少三种积极的问题解决方法，找出最好的方法，  
然后去行动，并写出你解决的结果。

我遇到的问题是

我感到

我当时的想法是

我用到的**秘籍**有 ( ) 1.冷静下来想办法  
可以多选可以 ( ) 2.找人聊出好办法  
多选，在前面 ( ) 3.积极行动最重要  
的括号里打√ ( ) 4.效果不好再来过

我想出的三个 1.  
解决方案是 2.  
3.

找人聊过以后，  
我觉得就最好的方案是

问题解决的结果怎么样？

# 第八次活动 阳光总在风雨后

## 主题口号

小挫折成就大梦想！彩虹是受挫折的阳光！

## 活动理念

承受挫折是心理弹性的重要指标。本次活动的主要内容是围绕着怎样看待挫折，怎样应对挫折，在挫折面前如何保有不折不挠的勇气展开的。希望通过本次活动让组员了解一切的困难都只是暂时的，挫折时人生的宝贵财富。

## 活动目标

1. 学会应用“压力-感受-想法-行为”分析挫折事件
2. 复习五种情绪管理方法
3. 复习积极三剑客的认知改变方法
4. 学习分享时的尊重回应
5. 了解到挫折是我们的老师
6. 了解到战胜挫折，需要不折不挠

## 活动流程

|                 |                                                           |       |
|-----------------|-----------------------------------------------------------|-------|
| 一、回顾            | 1、打招呼<br>2、唱组歌<br>3、热身游戏<br>4、回顾心理弹性练习                    | 15 分钟 |
| 二、主题活动《不折不挠林书豪》 | 1、引言<br>2、播放《不折不挠林书豪》<br>3、用压力-感受-想法-行动讨论林书豪的遭遇<br>4、组长总结 | 30 分钟 |
|                 | 休息一下                                                      | 10 分钟 |
| 三、主题活动《阳光总在风雨后》 | 1、引言<br>2、分享风雨卡<br>3、分享阳光卡<br>4、讨论如何战胜挫折                  | 30 分钟 |

|               |                                                          |       |
|---------------|----------------------------------------------------------|-------|
|               | 5、播放视频《每个挫折都有它的意义》<br>7、组长总结                             |       |
| 四、总结与布置心理弹性练习 | 1、组员分享印象深刻的地方<br>2、强调本次主题，发给主题贴纸<br>3、印花奖励<br>4、布置心理弹性练习 | 15 分钟 |

## 所需材料

1. PPT\_8, 笔记本电脑, 投影仪, 音箱, 小组规则海报, 印花贴纸, 水彩笔 10 套, 胶水、胶条, 奖品五种, 玩偶灰太狼
2. 主题砖头贴纸

**阳光总在风雨后**  
小挫折成就大梦想, 彩虹是受挫折的阳光!

3. 视频 8-1 《不折不挠林书豪》
4. 视频 8-2 《每个挫折都有它的意义》
5. 风雨阳光卡 10 张 (根据组员人数, 两面, 一面是风雨卡, 一面是阳光卡)
6. 风雨卡收集器 1 个 (用小纸箱制作)
7. 组员日记本  
8-1 心理弹性练习第八次《阳光总在风雨后》

## 活动方案

### 一、热身与回顾 (15 分钟)

1. 打招呼
2. 回顾活动
  - 5) 请组员分别分享自己的心理弹性练习。
  - 6) 请小组同学朗读成功日志上的一项。
  - 7) 组长总结, 并记录组员印花单。
  - 8) 组长回顾上一次活动的重点内容 (问题不是问题, 积极解决才是道理)。
3. 热身活动《鸡蛋变凤凰》

1) 游戏规则: 大家的起始级别为"鸡蛋"(蹲着), 每人随意寻找对象, 通过剪刀, 石头, 布或者其他猜拳方式与另外一个"鸡蛋" PK。PK 胜利者, 即可升级为"小鸡" (半蹲), 输家仍然为"鸡蛋"。第一轮结束后, "鸡蛋"和"鸡蛋" PK, "小鸡"和"小鸡"PK, 小鸡中赢的那个就升级为大公鸡 (站着), 然后大公鸡找大公鸡 PK, 赢的大公鸡就升级为凤凰 (站着双手高举"展翅")。直到游



戏无法进行（无人和自己配对进行比赛）游戏结束。

2) 请孩子分享游戏后的感受。可以邀请游戏结束时还是鸡蛋或者小鸡的孩子和已经成为凤凰的孩子分享。

3) 组长总结分享：鸡蛋虽然很脆弱，经过在层层挑战后，也有可能变成凤凰。最后大家是否都成长为凤凰并不重要，重要的是，大家能够面对这些挑战和失败，不断地坚持。大家在游戏中的表现让我很感动，我看到了有些同学虽然还没成长为凤凰，但是他们没有放弃。这个游戏告诉我们，虽然我们现在看起来都比较弱小，也会遇到很多的压力和困难，但是只要我们坚持，不断地学习知识和经验，就能慢慢成长为内心强大的人。今天我们心理弹性的砖头就是——阳光总在风雨后。

## 二、主题活动 《不折不挠-林书豪》（30 分钟）

### 1. 引言

大家有没有崇拜的偶像呢？大家知道他些什么遭遇所以敬仰他吗？今天老师想跟大家分享一位我很敬仰的偶像，他就是我们中国之光，红遍NBA 比赛的林书豪。因为他在比赛的出色表现，大家都很关注他，做了很多访问。大家知道他吗？知道他在成名之前遇到什么事吗？他要成为一名NBA 选手之前，遇到很多的压力，大家猜他会有什么样的压力呢？嗯，咱们看一个林书豪的访问，咱们一起听听，林书豪之前遇到什么困难的事好吗？

### 2. 播放《不折不挠-林书豪》

### 3. 讨论林书豪的挫折遭遇

1) 重现压力事件方程式：压力→感受→想法→行动

2) 分析林书豪的压力事件是

不被人看重，在外国很少人会给他机会，怀才不遇。

3) 体验林书豪当时的感受

伤心，一度为前途担忧，为此流泪很多次

使用哪种方法可以管理自己的情绪：冷静、释放、倾诉、转移、放松

4) 释放压力操：紧握双拳 放开双拳 甩开压力

5) 如果是我们林书豪，会有什么想法

“人家看不起我，我就不是一个打篮球的材料”“我现在没有机会，永远都没有机会”“我打篮球不好，什么事都不会好”

使用三大积极剑客转化消极

6) 解释挫折

这些让人很沮丧、很失望的压力经历就是挫折挫折看起来都给我们带来不好的事情而已，是这样的吗？他在遇到挫折的时候，身边人做了什么？他因而遇到什么机会呢？他因此学习到什么？这些经历对他之后成功有什么意义吗？在这过程中，我们可以看到林书豪的资源环上有些什么吗？资源环上的资源给了林书豪哥哥一些什么样的支持呀？

林书豪哥哥得到了很多的支持，我们可以利用之前学习的资源环看看林哥哥在这个过程中获得了什么资源。比如在亲人圈他获得了家人的支持，母亲说养育儿子，爸爸更是辞职做起了儿子的经纪人，大家可以看到在图中标出的这些黄色字体都是林书豪哥哥获得的资源，那么在这儿，老师也想问问小朋友，大家可不可以发动脑子想一想除了短片中体现的林书豪哥哥获得的资源外，林书豪哥哥还可能获得什么资源呢？好的，刚才大家猜想了那么多的林书豪哥哥可能获得的资源，那么老师想问小朋友们，如果你是林书豪，你在拥有了这么多的资源后会有什么样的感觉呢？是不是感到很温暖，很有力量，会感觉什么都不怕了，对这些来自资源环中的各种各样的资源就赋予了林书豪哥哥追求梦想的勇气，这些资源就像雨天里的一把小伞让林书豪哥哥勇敢的穿越风雨去拥抱彩虹，那么在短片中我们就可以看到在外在机遇的诱导下，这个外在机遇就是哈佛大学给出了加入篮球队的机会，这时加上林书豪哥哥自己的不懈努力最终获得了成功。

林书豪在挫折中获得了：

- a. 父母的支持
- b. 哈佛大学入学机会
- c. 社会学和经济学学士学习
- d. 利用它的灵活性，训练出有着“林”风格的技术

这都是在挫折之中发现的和拥有的资源

7) 讨论看到挫折下获得的资源，大家会有什么感受，会怎么看挫折事件

#### 4. 组长总结

从这个故事中我们可以看出挫折不仅仅会给我们让我们难过的灰色，会让我们伤心难过，但是还会给我么带来多种多样的色彩，比如从家人、朋友、偶像那里获得的各种各样的温暖和力量，最终这些灰色和彩色绘成了一幅多姿多彩的画面。从这里我们也可以发现，我们要不怕挫折，直面挑战，牢记一句话：**小挫折成就大梦想**，这样我们就能不断加强自我心理弹性，向梦想出发，拥抱生活，拥抱成功。

### 三、主题活动《阳光总在风雨后》（30 分钟）

#### 1. 引言

匿名写下自己的最重要的一件事，一件是难过的事。

我们每个人的一生中，我们会跟林书豪一样，会遇到很多高兴的，同样会悲伤的事情，这些事情有的对于我们来说是微不足道的，转瞬间就可以忘掉，而有的事情对于我们来说是很重要的，可能对我们的生活产生了重大的影响。现在我发给每个同学一张卡片，请大家写下你经历的人生中最大的一次风雨事件——让你难过的事情。不用写你的名字。写好后，折成“四方形”，（组长示范），放在风雨收集器。

#### 2. 轮流抽出风雨收集器中的卡片，进行分享。

分享的原则是，尊重、不评价、自己有没有发生过这样的事情、如果有发生你当时的心情

是怎样的，如果没有发生你觉得这位伙伴当时的心情是怎样的，给这位伙伴一些劝慰和祝福的话。分享后，其他同学可以给出这位同学一些回应。

请你以这样的句式开头“我抽到的这个风雨事件是……，我有/没有经历过这样的事情……我/他的心情（可能）是这样的……”。

### 3. 风雨背后的阳光。

翻转卡的后面，在阳光卡中写上同学认为我们可以从该挫折事件中收获什么，自己会通过它发现什么资源。

### 4. 带领同学分享阳光卡内容。

风雨会让我们难过，其实，不要忘记，风雨只是把后面的阳光遮住而已，阳光仍然在准备着给我们温暖。这些我们在挫折中得到他人的支持和发现自己的资源，这些东西会温暖我们，让我们面对困难。

### 5. 讨论如何战胜挫折。

跟同学讨论，我们怎么才可以战胜挫折呢？我们得到支持了，知道我们的优势，还需要什么才能走到成功？

### 6. 播放视频《每个挫折都有它的意义》

### 7. 组长总结

每一件发生的事情都有它的意义，只要坚持，站起来的次数比倒下去的次数多一次就是成功。积极的想法很关键，老天让你面对这件事情，是因为知道你有能力战胜它。当你战胜它的时候，你会上一个新的台阶，那时你眼前的风景是不一样的。无论发生了什么事情，我们都要相信，这一切都是最好的安排，这一切都是我的宝贵财富。**彩虹是受了挫折的阳光。**小朋友们，看到过彩虹吗？彩虹漂亮吗？你们知道彩虹是怎样形成的吗？雨后太阳公公将光芒洒向大地，半空中遇到了小雨滴的阻隔，才折射成了美丽的彩虹，彩虹是受了挫折的阳光。就像只有经过大雨的洗礼才会看到美丽的彩虹，当我们遇到挫折，千万不要灰心、放弃，挫折是上帝掉下来的礼物，坚持一下，就会看到不一样的风景。

## 四、总结与任务布置（15分钟）

### 1. 组员分享印象最深刻的地方

### 2. 组长总结

1) 生命的丰富多彩，无论发生什么，都是生活中的宝贵财富。

每个同学的生活都是丰富多彩的，不管这些对自己重要的事情是让自己开心的，还是让自己悲伤地，我们都应该感谢它，因为我们经历了这些事情，才知道什么是欢乐，才知道怎样去应对自己不不开心的事，才知道生命的意义是什么，让自己的生活变得开心，所以，今后我们无论面对什么样的事情，我希望同学们都能够坚强的面对，用一颗快乐坚强的心来创造自己美好的生活！

2) 发给主题砖头贴纸：

*小挫折成就大梦想。*

*彩虹是受挫折后的阳光！*

**3. 印花奖励**

组长总结今天同学的表现，表扬做的很好的地方，对主动参与活动的孩子奖励一个印花。

**4. 布置心理弹性练习**

组员日记本 8-1 心理弹性练习第八次：阳光总在风雨后



## 第八次 阳光总在风雨后

如果下面这是你的心，你经历的阳光和风雨有多大？你会用什么颜色和方式表示你经历的阳光和风雨？请画在下面。

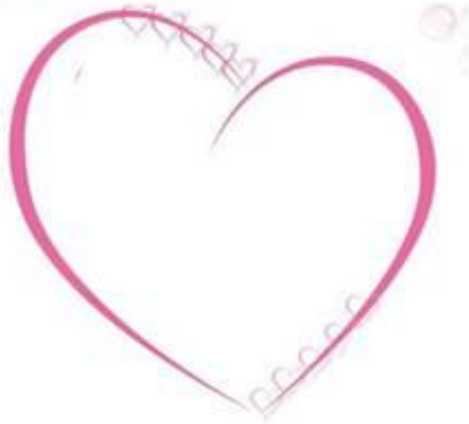

当别人分享我的这些事情的时候，我觉得

当我的这些事情一直不能跟别人说是，我的心情是

今天参加这个活动，听到大家经历的事情时，我觉得

分享我的挫折经历，我发现我的资源树上有

# 第九次活动 我的未来不是梦

## 主题口号

拥有理想，实现理想！

## 活动理念

每个人都有自己的长处与优点。找出自己和别人的优点，欣赏自己和别人的优点，增强自我概念与自信，让孩子们把这些优点和长处作为理想追求的美好资源，对未来充满希望。

## 活动目标

1. 学会欣赏别人的优点
2. 增强自信心，接纳自己的价值
3. 增强积极的未来期望

## 活动流程

|                 |                                                          |       |
|-----------------|----------------------------------------------------------|-------|
| 一、回顾            | 1、打招呼<br>2、唱组歌<br>3、打电话游戏<br>4、回顾心理弹性练习                  | 15 分钟 |
| 二、主题活动《神奇卡片》    | 1、引言<br>2、写神奇卡片<br>3、赠送神奇卡片                              | 30 分钟 |
|                 | 休息一下                                                     |       |
| 三、主题活动《我的未来不是梦》 | 1、画一个我<br>2、设计未来的我<br>3、小组分享                             | 30 分钟 |
| 四、总结与布置心理弹性练习   | 1、组员分享印象深刻的地方<br>2、强调本次主题，发给主题贴纸<br>3、印花奖励<br>4、布置心理弹性练习 | 15 分钟 |

## 所需材料

1. PPT\_9, 笔记本电脑, 投影仪, 音箱, 小组规则海报, 印花贴纸, 彩笔 10 套, 奖品五种, 玩偶灰太狼
2. 胶水、胶条（多一些, 第二个活动时每个孩子都要用）,
3. 剪刀
4. 废弃的报纸杂志（上面有各种图片供孩子使用）
5. 主题砖头贴纸

**我的未来不是梦**  
拥有理想, 实现理想!

6. 卡片 200 张（1/8A4 纸大小, 打印好组员名字）
7. 大海报 10 张（全开）
8. 组员日记本
  - 9-1 主题活动《神奇卡片》
  - 9-2 心理弹性练习第九次《理想计划书》

## 活动方案

### 一、回顾与热身（15 分钟）

1. 打招呼
2. 热身活动

打电话游戏, 组长分配, 让每个组员代表 0-9 十个数字之一。请组员站成一排, 组长随机说出一个电话号码, 组员听到自己的数字时要蹲一下。

3. 回顾活动

- 9) 请组员分别分享自己的心理弹性练习。
- 10) 请小组同学朗读成功日志上的一项。
- 11) 组长总结, 并记录组员印花单。
- 12) 组长回顾上一次活动的重点内容（小挫折成就大梦想, 彩虹是风雨过后的阳光）。

### 二、主题活动《神奇卡片》（30 分钟）

- 1、引言

表扬组员在这几天来的出色表现, 引出今天的活动。

在这几次的活动, 我看到很多人都好厉害, 有的人会演戏, 有的人会画画……, 每个人都有他会做的事情。同时, 很多人也发现了自己身边的好多资源, 可以帮你度过难关, 迎接充满阳光的未来。今天我们要做的活动叫做《我的未来不是梦》。



## 2、自我评估心情和自信程度

今天老师带来了许多神奇卡片，透露给大家，这些卡片的神奇之处就是可以让你心情变得非常好，让自己非常有自信。不信我们就试试看，在你的组员日记本上（1-1）上有一个心情温度计，请你先选出目前你的心情是几分，你的自信程度是几分。

## 3、组员写神奇卡片

现在我给每个人 20 张这样的卡片。[每个组员发给 20 张卡片（20=组员数 10\*2），卡片上已经打印出了每个组员的姓名。卡片事先准备好并分好，避免花太多时间。] 我们这里有 10 名同学，每人有 20 个卡片，上面有每个人的名字，请你在每张卡片上写下他的一个优点（包括你自己）。请你在卡片上写下每个组员（包括自己）的优点或能做的事情。[如果有的孩子写不出自己的优点，组长尽量引导他，组长也可以将自己所认为的优点告诉他，让他写在卡片上]

## 4、赠送神奇卡片

找出第一个要接受卡片的人。每个人都轮流大声读出他的优点，并把自己的神奇卡片送给他。

## 5、填写组员日记本《神奇的卡片》

好，现在请你在评估一下自己的心情和自信程度，然后选出来你最喜欢的神奇卡片，写在组员日记本相应的位置上。

## 6、组员分享

请组员分享自己的组员日记本

## 7、组长总结

大家或多或少都可以感觉到心情有一些不同了，知道自己拥有这么多优点、资源是很开心的事情。同时欣赏并告诉别人他的优点，也是很开心的事情。希望大家在受到挫折，迎接生活中的挑战的时候，永远记得这些神奇的卡片，当全世界都说你不好的时候，你依然能够想起自己身上也有一些让自己骄傲的地方！好，休息 10 分钟后，我们回来玩一个更好玩的游戏！大家要保留好这些神奇卡片，我们在下面的活动中要用到哦。

# 三、主题活动《我的未来不是梦》（30 分钟）

## 1、分两人一组

可以用桃花开分组，也可以组长根据组员的喜好自行分组。

## 2、画一个我

每人领取一张全开的海报纸。一个人躺在海报纸上，另一个人则拿彩色笔，沿着躺着的孩子的身体曲线描绘其外廓。画好后，交换角色，画第二个人的轮廓。

## 3、装饰未来的我

小朋友在自己的外廓图上，画出未来想从事职业的装扮。着上颜色。先用自己的 20 张神奇卡片装饰未来的我。也可以用任何图画、图片来“装饰”未来的自己

[组长可以带一些有图片的废弃杂志供孩子剪下来使用]

## 4、小组展示分享

根据时间，请若干组员在整个小组面前展示未来的自己，重要的不是说多少，或者说得多么好，目的增强孩子的积极未来观。当组员说到消极方面的时候，组长要帮助组员积极再定义。

## 5、组长总结

大家做的非常好！每个人都找到了自己未来的梦想！知道自己的梦想，并未自己的梦想而努力

是非常美好的事情。大家还记的加菲猫的笑话吗？对除了找到理想之外，我们还要脚踏实地的一步一步朝自己的理想努力，所以我们今天的小口号就是“**拥有理想，实现理想**”！[发给主题贴纸，请同学贴在自己的心灵小屋上]

## 四、总结与任务布置（15分钟）

- 1、组员分享今天印象深刻的地方
- 2、印花奖励积极参加的组员
- 3、布置心理弹性练习第九次《理想计划书》

*就像我们的小口号一样，拥有理想还不够，还要实现理想，请大家打开今天的心理弹性练习《理想计划书》。[组长解释如何填写]先把理想写下来，然后写出自己目前的情况，想想自己的优势是什么，之后制定出行动计划，看看在每一步计划中谁可以帮忙。*

- 4、请组员邀请家长参加下一次活动

组员日记本 9-1 主题活动《神奇卡片》

心情温度计（卡片赠送前）

|                                                                                   |                                                                                   |                                                                                   |                                                                                    |                                                                                     |
|-----------------------------------------------------------------------------------|-----------------------------------------------------------------------------------|-----------------------------------------------------------------------------------|------------------------------------------------------------------------------------|-------------------------------------------------------------------------------------|
|  |  |  |  |  |
| <input type="checkbox"/> 非常不开心                                                    | <input type="checkbox"/> 有点不开心                                                    | <input type="checkbox"/> 平静的心情                                                    | <input type="checkbox"/> 有点开心                                                      | <input type="checkbox"/> 非常开心                                                       |

心情温度计（卡片赠送后）

|                                                                                   |                                                                                   |                                                                                   |                                                                                    |                                                                                     |
|-----------------------------------------------------------------------------------|-----------------------------------------------------------------------------------|-----------------------------------------------------------------------------------|------------------------------------------------------------------------------------|-------------------------------------------------------------------------------------|
|  |  |  |  |  |
| <input type="checkbox"/> 非常不开心                                                    | <input type="checkbox"/> 有点不开心                                                    | <input type="checkbox"/> 平静的心情                                                    | <input type="checkbox"/> 有点开心                                                      | <input type="checkbox"/> 非常开心                                                       |

在二十张神奇卡片中，选出五张你最喜欢的，把它的内容写下来

|  |
|--|
|  |
|--|

# 理想计划书

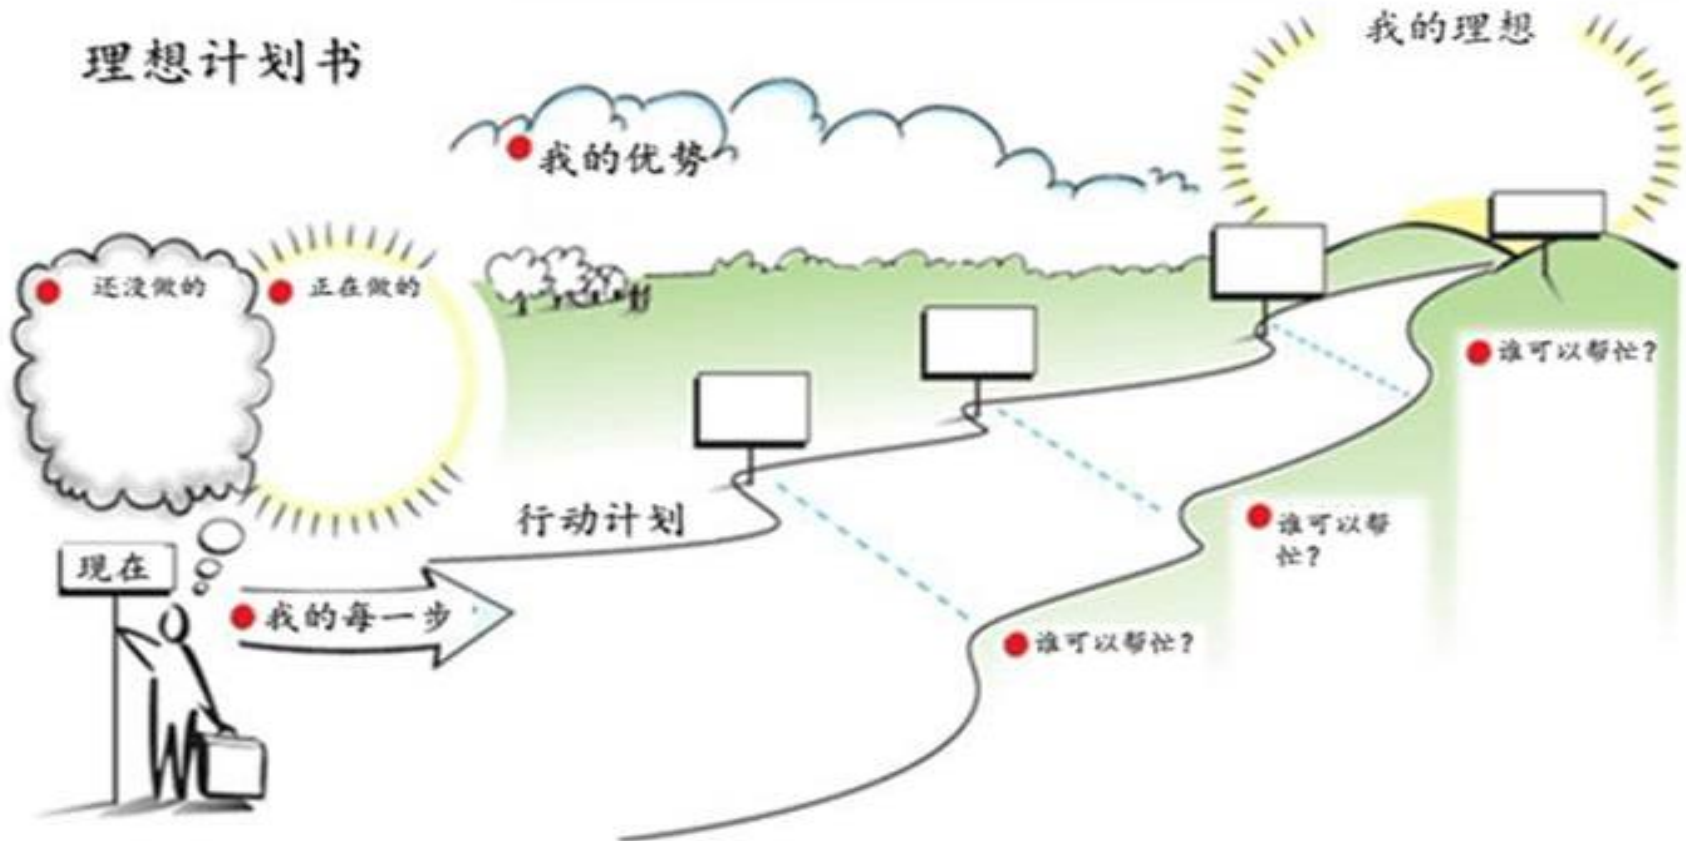

# 第十次活动 让爱发光

## 主题口号

我的心理弹性之旅！

## 活动理念

本次活动的主题是统整整个活动内容，激励孩子们勇敢的面对困境，了解未来不会一路平坦，只要怀着积极坚定的心，就可以拥有心理弹性，战胜困难，实现自己的理想。邀请家长一起参加本次活动。

## 活动目标

1. 统整心理弹性干预的概念和所学技能
2. 激励面对苦难的勇气和力量
3. 意识到自己的资源

## 活动流程

|                  |                                                |       |
|------------------|------------------------------------------------|-------|
| 一、回顾             | 1、打招呼<br>2、学唱《让爱发光》<br>3、回顾心理弹性练习              | 15 分钟 |
| 二、主题活动《我的心理弹性之旅》 | 1、组长引言<br>2、组员带领组员回顾心理弹性之旅<br>3、组员选择活动列报告提纲    | 30 分钟 |
|                  | 休息一下                                           | 10 分钟 |
| 三、主题活动《家长报告会》    | 1、组员报告会开始<br>2、播放《力克胡哲的精彩人生》<br>3、请组员及家长分享感受   | 30 分钟 |
| 四、小组结束           | 1、组长赠卡给组员<br>2、颁发证书，兑换印花单礼物<br>3、唱《组歌》《让爱发光》结束 | 15 分钟 |

## 所需材料

1. PPT\_10, 笔记本电脑, 投影仪, 音箱, 小组规则海报, 印花贴纸, 水彩笔 10 套, 胶水、胶条, 奖品五种, 玩偶灰太狼
2. 主题砖头贴纸

让爱发光  
我的心理弹性之旅

3. 心理弹性证书（附件 10.1）
4. 组长送给每个组员的卡片 10 张
5. 视频 10-1 《力克胡哲的精彩人生》
6. 音频 10-1 《让爱发光》歌曲
7. 组员日记本  
10-1 我的心理弹性之旅
8. 小组活动反馈表（附件 10-1）

## 活动方案

### 一、回顾与热身（15 分钟）

#### 1. 打招呼

小组继续围成圆圈/半圆坐, 家长坐在外面观看

#### 2. 回顾活动

- 1) 请组员分别分享自己的心理弹性练习。
- 2) 请小组同学朗读你成功日志上的一项。
- 3) 组长总结, 并记录组员印花单。
- 4) 组长回顾上一次活动的重点内容并引出本次活动主题。

#### 3. 学唱《让爱发光》（音频 10-1）

组员在组长的带领下学习《让爱发光》这首歌的歌词和动作。

一天见你一面/一面想你一点/一点记在心田/每天都有你和我的画面

真心付出真情永远都不晚/朋友, 谢谢你给我/分享你每次成长

让爱发光/让梦温暖/谁不是一边受伤一边学勇敢

世界再大再广/如果没有死党/我的心就像黑夜没有月亮

是你给我/爱的光

## 二、主题活动《我的心理弹性之旅》（30分钟）

### 1. 组长统整9次活动内容统整

1) 呈现放好10块砖头的房子，请组员分享看到之后的感受和想法。

大家看到心灵小屋的10块砖头都放好了之后有什么感受？我们要首先给自己的一些欣赏，一直走完了十次的心理弹性之旅。

2) 带领大家回忆每一个砖头活动的内容，生活中是如何运用学习到的内容的[请组员举例说明]。（组员日记本10-1）

第一次活动七彩生活，我们做了画了自己的七彩生活，看到了生活中有开心也有不开心，暗色是色彩的一部分；选择看到生活的各种颜色，生活就会多姿多彩，所以，“不开心很正常，我的开心我做主！”

第二次活动积极剑客，我们认识了不气馁的小新、和打不倒的灰太狼。了解到压力会影响我们的想法，最后影响结果（压力→想法→结果）。好的想法带来好的结果，坏的想法带来坏的结果，如果想让事情的结果变好，就要看到事情积极的一方面，我们认识了三大剑客，他们都是谁呢？（积极、暂时、具体三大剑客），一起拯救了小猪村。我们的小口号是“积极剑客、消极全撤！我们都是积极小剑客！”

第三次活动情绪高手，我们认识了小天竺鼠和小兔子，知道压力也会产生不好的情绪（压力→情绪→结果）我们一起学会了调整情绪的四大方法，是什么？（释放法、转移法、倾诉法、放松法）。我们还用这些方法处理了我们的情绪罐子。我们的小口号是“压力来了我不怕，情绪高手有办法”！

第四次活动沟通小能手，我们听了小猪三兄弟沟通的故事，了解到三种沟通方式，自信式沟通（喜羊羊），攻击式沟通（沸羊羊）和退缩式沟通（懒羊羊），哪一种最能解决问题？（自信式沟通）。我们有自信沟通四部曲：做情绪的主人→自信的身体语言[组长带领大家做自信的身体语言]→尊重平等人是因为什么而尊贵]→“我”的表达[事件+我的情绪+积极的选择]。我们的小口号是：自信沟通四部曲，我是沟通小能手！

第五次活动爱的连结，我们学会了自信+爱的沟通，要用心听到父母和老师心中的爱。家人是我们的宝贵财富。我们的小口号是：家人沟通需要爱，我为家人负责，我为自己负责！

第六次活动我的支持环，我们了解到在学校中，生活中，彼此支持很重要，你帮助我，我帮助你，很多难题就解决了。每个人都有一个自己独特的支持环，遇到自己无法解决的困难时，可以支持环里的人帮忙。我们的小口号是：爱是可以传递的，彼此支持，温暖你我！

第七次活动问题解决秘籍会里，我们学会了四个秘籍，都是什么啊？冷静下来想办法，找人聊出好办法，我们的小口号是：积极行动最重要，效果不好再来过。问题不是问题，积极解决才是道理！

第八次活动是阳光总在风雨后，我们认识了不屈不挠的林书豪大哥哥，他坚持不懈，终于获得自己事业的成功，任何挫折都是我们的宝贵财富，通过这些挫折，我们可以获得很多资源。

我们的小口号是：小挫折成就大梦想，彩虹是受挫折的阳光。

第九次活动是我的未来不是梦，我们得到了许多神奇卡片，又送出了很多神奇卡片，这些神奇卡片将会帮我们实现我们的理想，计划很重要，行动更重要。脚踏实地的努力才会有最终的成功。我们的小口号是：拥有理想，实现理想！

## 2. 组员分享及列提纲

- 1) 你最喜欢哪次小组活动，为什么。
- 2) 请每一位组员选择一次活动，一会儿呈现给小组成员和家长。
- 3) 请组员列发言提纲 (组员日记本 10-2)

## 三、主题活动《父母报告会》(30 分钟)

### 1. 开场白

现在，我们每个组员都要向在座的家长报告我们学过的课程。每个孩子都会报告他们的目标、他们的进步、他们最喜欢小组的哪一点。当孩子们呈现完后。我会邀请你们表扬你所看到的孩子进步的一个方面。然后我们会一起听一个神秘来客的演讲。

### 2. 进行组员报告会

### 3. 播放《力克胡哲的精彩人生》(视频 10-1)

### 4. 组员及家长分享

1. 送给每个组员一个小卡片，上面写着你送给他的一句话。
2. 证书颁发仪式。

颁发给每个孩子一个心理弹性证书，没有兑换印花礼物的同学兑换印花礼物。

### 3. 鼓励小组成员在生活中应用我们小组中所学。

### 4. 发给每个组员《小组活动反馈表》(附件 10-1)

### 5. 共唱组歌《让爱发光》，结束小组活动。



## 组员日记本 10-1 心理弹性练习第十次《心理弹性之旅》

### 心理弹性练习第十次：心理弹性之旅

为拥有心理弹性继续努力！记住使用积极的想法、做情绪的主人、勇敢的面对生活中的每一次困境！

**第一次 七彩生活：**不开心很正常，我的开心我做主！

- 生活中暗色也有亮色
- 亮色在暗色的衬托下更生动了
- 色彩缤纷是生活的本色

**第二次 积极剑客：**积极剑客，消极全撤，我们都是积极小剑客！

- 不气馁的小新
- 打不倒的灰太狼
- 积极三剑客：暂时、具体、事实
- 积极想法-积极结果

**第三次 情绪高手：**压力来了我不怕，情绪高手有办法！

- 积极情绪-积极结果
- 调整情绪的四种方法：释放法、转移法、倾诉法、小猪放松法
- 适当的情绪罐子水位是正常的

**第四次 沟通小能手：**自信沟通四部曲，我是沟通小能手！

- 自信式沟通解决问题，攻击式沟通和退缩式沟通产生新的问题
- 自信式沟通四部曲：做情绪的主人→自信的身体语言→尊重平等→‘我’的表达
- 智者说：人因为行为而尊贵
- “我”的表达 = 事件+感受+积极建议

**第五次 爱的连结：**家人沟通需要爱，我为家人负责，我为自己负责！

- 听到家长或老师责骂我们背后的原因
- 自信+爱的沟通=事件+感受+爱+积极建议
- 家人是我们的宝贵财富

**第六次 我的支持环：**爱是可以传递的，彼此支持，温暖你我！

- 彼此支持，传递爱，就会解决很多难题
- 每个人身边都有自己的支持环
- 自己也可以成为别人的资源

**第七次 问题解决秘籍会：**问题不是问题，积极解决才是道理！

- 积极的解决方法是不出现新的问题
- 问题解决秘籍环：冷静下来想办法，找人聊出好办法，积极行动最重要，效果不好再来过

**第八次 阳光总在风雨后：**小挫折成就大梦想，彩虹是受挫折的阳光！

- 挫折是生活中不可避免的
- 所有的挫折都是人生的宝贵财富
- 战胜挫折，需要像林书豪一样不折不挠

**第九次 我的未来不是梦：**拥有理想，实现理想！

- 每个人都是独特的，拥有很多神奇卡片
- 未来掌握在自己的手中
- 计划很重要，行动更重要！

**第十次 让爱发光：我的心理弹性之旅！**

- 建筑自己的心灵小屋
- 态度决定高度，人生没有限制
- 一步一步实现自己的梦想
- 共同成长，让爱发光

## 组员日记本 10-2 父母报告会发言提纲

我喜欢心理弹性小组的理由是

- 1.
- 2.
- 3.

我的心理弹性目标是

我做了哪些努力来实现自己这个目标

- 1.
- 2.
- 3.

我取的进步有

- 1.
- 2.
- 3.

我最喜欢的一个小组活动的名字是

在这个活动中，我学到了

- 1.
- 2.
- 3.

这次活动的小口号是

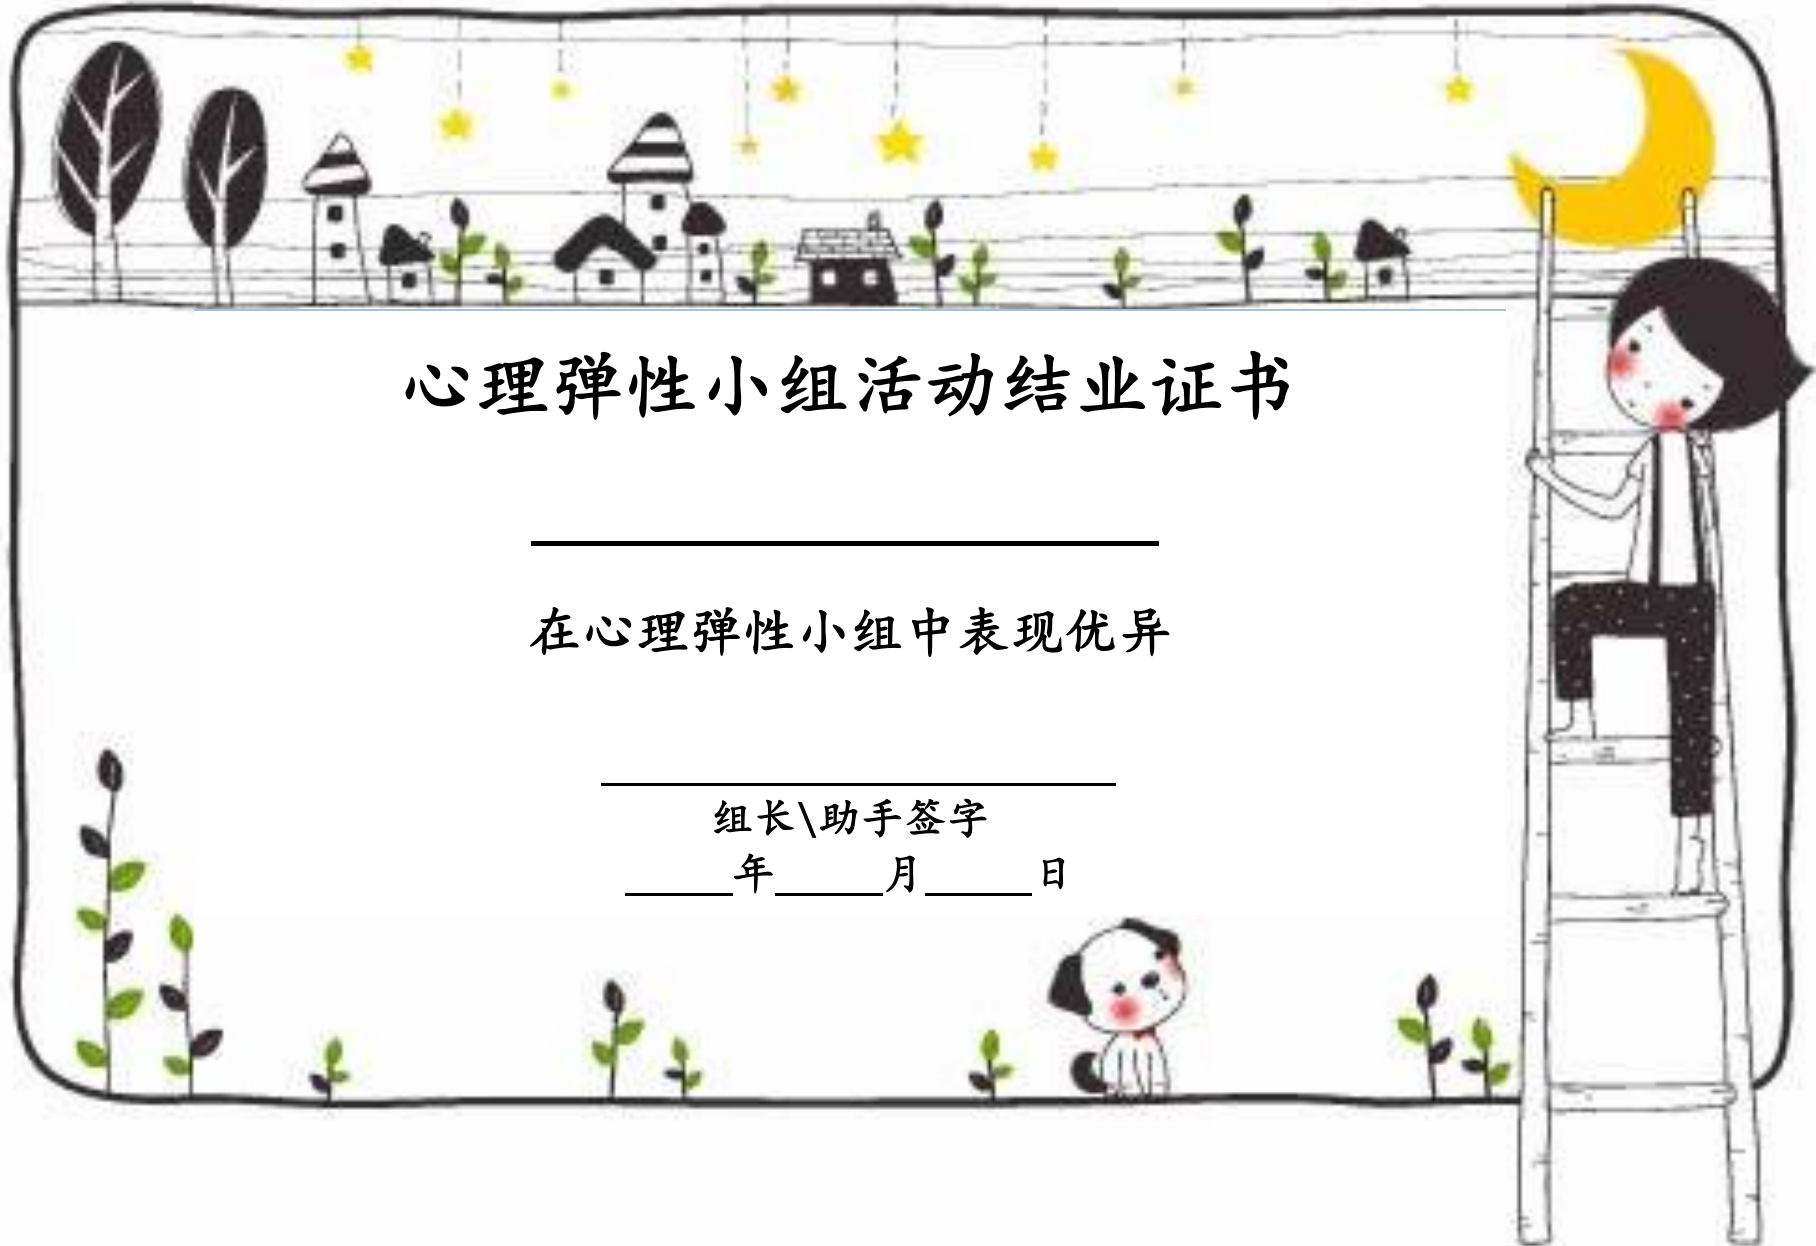

## 附件 10-1 小组活动反馈表（组员用）

年级：\_\_\_\_\_ 活动老师：\_\_\_\_\_ 活动助手：\_\_\_\_\_

亲爱的同学：

我们一起走过了 10 次精彩又难忘的心理弹性之旅，大家的心灵弹性小屋建得怎么样了呢？希望大家都能拥有“弹性的心灵、开心的微笑”。我很希望了解你对活动的看法，请根据你的观察和感受，评价一下通过活动之后你在以下方面有进步：0=没有进步，1=有一些进步；2 很大进步。

### 你进步了吗？

|                  | 没有进步 | 有一些进步 | 很大进步 |
|------------------|------|-------|------|
| 1. 对生活有积极的看法     | 0    | 1     | 2    |
| 2. 解决问题的能力       | 0    | 1     | 2    |
| 3. 调整自己的情绪的能力    | 0    | 1     | 2    |
| 4. 应对压力能力        | 0    | 1     | 2    |
| 5. 处理同学之间友好相处的能力 | 0    | 1     | 2    |
| 6. 和父母沟通的能力      | 0    | 1     | 2    |
| 7. 寻求别人帮助的能力     | 0    | 1     | 2    |
| 8. 帮助别人的能力       | 0    | 1     | 2    |
| 9. 勇敢面对挫折        | 0    | 1     | 2    |
| 10. 对未来充满期望      | 0    | 1     | 2    |
| 11. 乐观面对生活       | 0    | 1     | 2    |
| 12. 心理弹性         | 0    | 1     | 2    |

### 你的满意程度是？

|                     | 非常不满意 | 不满意 | 中立 | 满意 | 非常满意 |
|---------------------|-------|-----|----|----|------|
| 13. 我对带领活动的老师的满意程度是 | 1     | 2   | 3  | 4  | 5    |
| 14. 我对带领活动的助手的满意程度是 | 1     | 2   | 3  | 4  | 5    |
| 15. 我对整个活动团体的满意程度是  | 1     | 2   | 3  | 4  | 5    |

如果以后有这样的活动，你还愿意参加吗？请选择一项。

0.不愿意            1 不一定            2 愿意            3 非常愿意

16. 你对 10 次活动的评分是：（在一下空格里填上分数，起分为 0 分，满分为 10 分）

|         |                                                        |           |                                                        |
|---------|--------------------------------------------------------|-----------|--------------------------------------------------------|
| 1.七彩生活  | <input style="width: 80%; height: 20px;" type="text"/> | 6.我的支持环   | <input style="width: 80%; height: 20px;" type="text"/> |
| 2.积极剑客  | <input style="width: 80%; height: 20px;" type="text"/> | 7.问题解决会   | <input style="width: 80%; height: 20px;" type="text"/> |
| 3.情绪高手  | <input style="width: 80%; height: 20px;" type="text"/> | 8.阳光总在风雨后 | <input style="width: 80%; height: 20px;" type="text"/> |
| 4.沟通小能手 | <input style="width: 80%; height: 20px;" type="text"/> | 9.我的未来不是梦 | <input style="width: 80%; height: 20px;" type="text"/> |
| 5.爱的连结  | <input style="width: 80%; height: 20px;" type="text"/> | 10.让爱发光   | <input style="width: 80%; height: 20px;" type="text"/> |

## 附录 1 活动过程评估表（组长用）

| 活动名称         |     |       |    |      | 出席状况 |        |
|--------------|-----|-------|----|------|------|--------|
| 内容           | 自评  | 授课自评  |    |      |      | 学生反应自评 |
|              |     | 做的好地方 | 启发 | 不足之处 | 改进对策 |        |
| 导入           |     |       |    |      |      |        |
| 主题<br>活<br>动 | 活动一 |       |    |      |      |        |
|              | 活动二 |       |    |      |      |        |
| 结束           |     |       |    |      |      |        |

## 附录 2 活动实施忠诚度评估表（副组长用）

- 使用时间:每次活动后
- 管理: 河大项目组成员
- 填写人: 副组长/观测员
- 内容包括: 使用须知, 1-10 次课程评估表
  - 1: 七彩生活
  - 2: 积极剑客
  - 3: 情绪高手
  - 4: 沟通小能手
  - 5: 爱的连结
  - 6: 我的支持环
  - 7: 问题解决秘籍会
  - 8: 阳光总在风雨后
  - 9: 我的未来不是梦
  - 10: 让爱发光

### 使用须知:

- **每一次活动都对应有评估表。**填写人对应每一课的主要活动情况在相应“活动框”中进行评估。每次活动的评估都包括三项: 按照建议完成、按照建议完成但有所改变、未完成。
- **即时完成表格。**每次课程结束后立即完成表格以确保观测结果如实。
- **尽可能提供详尽反馈。**详尽的反馈将有助于本项目活动方案按建议实施。请在备忘栏中记录: 活动实施的任何改变, 以及有助于增强活动效果的建议。涉及活动内容、结构及材料的建议方面的建议非常宝贵, 希望评估员与方案实施人员进行沟通。

再次感谢您给予的帮助!

表格填写人: (请选其一)

(1) 活动助手      (2) 观察员

(3) 其他 (请具体说明) \_\_\_\_\_

(4) 姓名 \_\_\_\_\_ 日期 \_\_\_\_\_

## 活动 1：七彩生活

组长: \_\_\_\_\_ 副组长: \_\_\_\_\_  
 日期: \_\_\_\_\_ 地点: \_\_\_\_\_  
 开始时间: \_\_\_\_\_ 结束时间: \_\_\_\_\_  
 开始时的组员数 \_\_\_\_\_ 结束时的组员数 \_\_\_\_\_

|                                       |                                                                                                                                                                                                                                                                                                                                                                                                                                                                                                                                                                    |                                                                                                                                                                           |
|---------------------------------------|--------------------------------------------------------------------------------------------------------------------------------------------------------------------------------------------------------------------------------------------------------------------------------------------------------------------------------------------------------------------------------------------------------------------------------------------------------------------------------------------------------------------------------------------------------------------|---------------------------------------------------------------------------------------------------------------------------------------------------------------------------|
| <p><b>在此注明取消，新增或变更活动的原因及调整建议：</b></p> | <p><b>活动 1.1 建立关系</b></p> <p><input type="checkbox"/> 依照建议完成</p> <p><input type="checkbox"/> 依照建议完成，但有所改变</p> <p><input type="checkbox"/> 未完成</p> <p><b>备注：</b></p>                                                                                                                                                                                                                                                                                                                                                                                                | <p><b>活动 1.4 主题活动《七彩生活》</b></p> <p><input type="checkbox"/> 依照建议完成</p> <p><input type="checkbox"/> 依照建议完成，但有所改变</p> <p><input type="checkbox"/> 未完成</p> <p><b>备注：</b></p> |
|                                       | <p><b>活动 1.2 小组规范</b></p> <p><input type="checkbox"/> 依照建议完成</p> <p><input type="checkbox"/> 依照建议完成，但有所改变</p> <p><input type="checkbox"/> 未完成</p> <p><b>备注：</b></p>                                                                                                                                                                                                                                                                                                                                                                                                | <p><b>活动 1.5 总结和介绍组员日记本</b></p> <p><input type="checkbox"/> 依照建议完成</p> <p><input type="checkbox"/> 依照建议完成，但有所改变</p> <p><input type="checkbox"/> 未完成</p> <p><b>备注：</b></p> |
|                                       | <p><b>活动 1.3 主题活动《我的心灵小屋》</b></p> <p><input type="checkbox"/> 依照建议完成</p> <p><input type="checkbox"/> 依照建议完成，但有所改变</p> <p><input type="checkbox"/> 未完成</p> <p><b>备注：</b></p>                                                                                                                                                                                                                                                                                                                                                                                        |                                                                                                                                                                           |
|                                       | <p><b>多选，选出符合以下条件的选项：</b></p> <p><input type="checkbox"/> 组员了解了小组主题目标及活动形式</p> <p><input type="checkbox"/> 组员通过循环沟通彼此认识</p> <p><input type="checkbox"/> 组员参与了承诺仪式并在小组规则上签名</p> <p><input type="checkbox"/> 组员学唱了《心理弹性之歌》</p> <p><input type="checkbox"/> 组长讲述了《我的心灵小屋》的故事</p> <p><input type="checkbox"/> 组员画了自己的《七彩生活》</p> <p><input type="checkbox"/> 组员在小组中分享了自己的七彩生活作品</p> <p><input type="checkbox"/> 组员明白了小组的奖励系统</p> <p><input type="checkbox"/> 组长总计并给予了印花奖励</p> <p><input type="checkbox"/> 组长布置了心理弹性作业《我的目标》</p> <p><input type="checkbox"/> 组员唱组歌结束</p> |                                                                                                                                                                           |

## 活动 2：积极剑客

组长: \_\_\_\_\_ 副组长: \_\_\_\_\_  
 日期: \_\_\_\_\_ 地点: \_\_\_\_\_  
 开始时间: \_\_\_\_\_ 结束时间: \_\_\_\_\_  
 开始时的组员数 \_\_\_\_\_ 结束时的组员数 \_\_\_\_\_

|                                        |                                                                                                                                                                                                                                                                                                                                                                                                                                                                                                                                                                                                        |                                                                                                                                                                         |
|----------------------------------------|--------------------------------------------------------------------------------------------------------------------------------------------------------------------------------------------------------------------------------------------------------------------------------------------------------------------------------------------------------------------------------------------------------------------------------------------------------------------------------------------------------------------------------------------------------------------------------------------------------|-------------------------------------------------------------------------------------------------------------------------------------------------------------------------|
| <p><b>在此注明取消, 新增或变更活动的原因及调整建议:</b></p> | <p><b>活动 2.1 回顾与热身</b></p> <p><input type="checkbox"/> 依照建议完成<br/> <input type="checkbox"/> 依照建议完成, 但有所改变<br/> <input type="checkbox"/> 未完成</p> <p><b>备注:</b></p>                                                                                                                                                                                                                                                                                                                                                                                                                                      | <p><b>活动 2.3 主题活动《积极三剑客》</b></p> <p><input type="checkbox"/> 依照建议完成<br/> <input type="checkbox"/> 依照建议完成, 但有所改变<br/> <input type="checkbox"/> 未完成</p> <p><b>备注:</b></p> |
|                                        | <p><b>活动 2.2 主题活动《积极的小新》</b></p> <p><input type="checkbox"/> 依照建议完成<br/> <input type="checkbox"/> 依照建议完成, 但有所改变<br/> <input type="checkbox"/> 未完成</p> <p><b>备注:</b></p>                                                                                                                                                                                                                                                                                                                                                                                                                                | <p><b>活动 2.4 总结与心理弹性练习布置</b></p> <p><input type="checkbox"/> 依照建议完成<br/> <input type="checkbox"/> 依照建议完成, 但有所改变<br/> <input type="checkbox"/> 未完成</p> <p><b>备注:</b></p> |
|                                        | <p><b>多选, 选出符合以下条件的选项:</b></p> <p><input type="checkbox"/> 组员分享了自己的心理弹性目标<br/> <input type="checkbox"/> 组员分享了自己的成功日志<br/> <input type="checkbox"/> 组长带领组员回顾了《七彩生活》的内容与主题口号<br/> <input type="checkbox"/> 组员学习了“积极想法-积极行为”的方程式<br/> <input type="checkbox"/> 组长讲述了《积极三剑客》故事<br/> <input type="checkbox"/> 组员学习了三种转变消极想法的方法<br/> <input type="checkbox"/> 组员完成了《拯救小猪村》的活动<br/> <input type="checkbox"/> 组员分享了《拯救小猪村》活动的想法和感受<br/> <input type="checkbox"/> 组员分享了本课所学<br/> <input type="checkbox"/> 组长总结并进行印花奖励<br/> <input type="checkbox"/> 组长布置了心理弹性练习《我的想法》<br/> <input type="checkbox"/> 组员唱组歌结束</p> |                                                                                                                                                                         |



### 活动 3：情绪高手

组长: \_\_\_\_\_ 副组长: \_\_\_\_\_  
 日期: \_\_\_\_\_ 地点: \_\_\_\_\_  
 开始时间: \_\_\_\_\_ 结束时间: \_\_\_\_\_  
 开始时的组员数 \_\_\_\_\_ 结束时的组员数 \_\_\_\_\_

|                                                                                                                                                                                                                                                                                                                                                                                                                                                                                                                                                                                                                                                                                                                         |                                                                                                                                                                       |                                                                                                                                                                          |
|-------------------------------------------------------------------------------------------------------------------------------------------------------------------------------------------------------------------------------------------------------------------------------------------------------------------------------------------------------------------------------------------------------------------------------------------------------------------------------------------------------------------------------------------------------------------------------------------------------------------------------------------------------------------------------------------------------------------------|-----------------------------------------------------------------------------------------------------------------------------------------------------------------------|--------------------------------------------------------------------------------------------------------------------------------------------------------------------------|
| <p><i>在此注明取消，新增或变更活动的原因及调整建议：</i></p>                                                                                                                                                                                                                                                                                                                                                                                                                                                                                                                                                                                                                                                                                   | <p><b>活动 2.1 回顾与热身</b></p> <p><input type="checkbox"/> 依照建议完成<br/> <input type="checkbox"/> 依照建议完成，但有所改变<br/> <input type="checkbox"/> 未完成</p> <p><b>备注:</b></p>      | <p><b>活动 2.3 主题活动《情绪高手论压力》</b></p> <p><input type="checkbox"/> 依照建议完成<br/> <input type="checkbox"/> 依照建议完成，但有所改变<br/> <input type="checkbox"/> 未完成</p> <p><b>备注:</b></p> |
|                                                                                                                                                                                                                                                                                                                                                                                                                                                                                                                                                                                                                                                                                                                         | <p><b>活动 2.2 主题活动《情绪高手》</b></p> <p><input type="checkbox"/> 依照建议完成<br/> <input type="checkbox"/> 依照建议完成，但有所改变<br/> <input type="checkbox"/> 未完成</p> <p><b>备注:</b></p> | <p><b>活动 2.4 总结与心理弹性练习布置</b></p> <p><input type="checkbox"/> 依照建议完成<br/> <input type="checkbox"/> 依照建议完成，但有所改变<br/> <input type="checkbox"/> 未完成</p> <p><b>备注:</b></p>   |
| <p><i>多选，选出符合以下条件的选项：</i></p> <p><input type="checkbox"/> 组员分享了心理弹性练习的完成情况<br/> <input type="checkbox"/> 组员分享了自己的成功日志<br/> <input type="checkbox"/> 组长带领组员回顾了《积极剑客》的内容与主题口号<br/> <input type="checkbox"/> 组员进行了活动《情绪配对》<br/> <input type="checkbox"/> 组长讲述了故事《我好难过》<br/> <input type="checkbox"/> 组员讨论了处理难过的方法<br/> <input type="checkbox"/> 组长讲述了故事《我好生气》<br/> <input type="checkbox"/> 组员讨论了处理生气的方法<br/> <input type="checkbox"/> 组长总结了积极调整情绪的四种方法<br/> <input type="checkbox"/> 组员完成了《我的情绪罐子》<br/> <input type="checkbox"/> 组员分享了自己调整情绪的高招<br/> <input type="checkbox"/> 组员分享了本课所学<br/> <input type="checkbox"/> 组长总结并印花奖励<br/> <input type="checkbox"/> 组长布置了心理弹性练习《我的感觉》<br/> <input type="checkbox"/> 组员唱组歌结束</p> |                                                                                                                                                                       |                                                                                                                                                                          |

## 活动 4：沟通小能手

组长: \_\_\_\_\_ 副组长: \_\_\_\_\_  
 日期: \_\_\_\_\_ 地点: \_\_\_\_\_  
 开始时间: \_\_\_\_\_ 结束时间: \_\_\_\_\_  
 开始时的组员数 \_\_\_\_\_ 结束时的组员数 \_\_\_\_\_

|                                        |                                                                                                                                                                                                                                                                                                                                                                                                                                                                                                                                                                                                                                                                                                                                                                                                                         |                                                                                                                                                                           |
|----------------------------------------|-------------------------------------------------------------------------------------------------------------------------------------------------------------------------------------------------------------------------------------------------------------------------------------------------------------------------------------------------------------------------------------------------------------------------------------------------------------------------------------------------------------------------------------------------------------------------------------------------------------------------------------------------------------------------------------------------------------------------------------------------------------------------------------------------------------------------|---------------------------------------------------------------------------------------------------------------------------------------------------------------------------|
| <p><b>在此注明取消, 新增或变更活动的原因及调整建议:</b></p> | <p><b>活动 4.1 回顾热身</b></p> <p><input type="checkbox"/> 依照建议完成<br/> <input type="checkbox"/> 依照建议完成, 但有所改变<br/> <input type="checkbox"/> 未完成</p> <p><b>备注:</b></p>                                                                                                                                                                                                                                                                                                                                                                                                                                                                                                                                                                                                                                                        | <p><b>活动 4.3 主题活动《我是沟通小能手》</b></p> <p><input type="checkbox"/> 依照建议完成<br/> <input type="checkbox"/> 依照建议完成, 但有所改变<br/> <input type="checkbox"/> 未完成</p> <p><b>备注:</b></p> |
|                                        | <p><b>活动 4.2 主题活动《自信沟通四部曲》</b></p> <p><input type="checkbox"/> 依照建议完成<br/> <input type="checkbox"/> 依照建议完成, 但有所改变<br/> <input type="checkbox"/> 未完成</p> <p><b>备注:</b></p>                                                                                                                                                                                                                                                                                                                                                                                                                                                                                                                                                                                                                                               | <p><b>活动 4.4 总结和任务布置</b></p> <p><input type="checkbox"/> 依照建议完成<br/> <input type="checkbox"/> 依照建议完成, 但有所改变<br/> <input type="checkbox"/> 未完成</p> <p><b>备注:</b></p>       |
|                                        | <p><b>多选, 选出符合以下条件的选项:</b></p> <p><input type="checkbox"/> 组员分享了心理弹性练习的完成情况<br/> <input type="checkbox"/> 组员分享了自己的成功日志<br/> <input type="checkbox"/> 组长带领组员回顾了情绪调整四种方法及上次活动的主题口号<br/> <input type="checkbox"/> 组长讲述了《三兄弟沟通》的故事<br/> <input type="checkbox"/> 组员认识了三种沟通方式<br/> <input type="checkbox"/> 组员讨论了积极沟通第一步: 做情绪的主人<br/> <input type="checkbox"/> 组长示范同学练习了积极沟通第二步: 自信的身体语言<br/> <input type="checkbox"/> 组长播放了视频《谁都是平等》示范了积极沟通第三步: 尊重平等<br/> <input type="checkbox"/> 组员讨论学习了积极沟通第四步: “我”的表达<br/> <input type="checkbox"/> 组员完成了《我是沟通小能手》活动<br/> <input type="checkbox"/> 组员表演了情境一的解决方法<br/> <input type="checkbox"/> 组员表演了情境二的解决方法<br/> <input type="checkbox"/> 组员分享了本课所学<br/> <input type="checkbox"/> 组长总结并印花奖励<br/> <input type="checkbox"/> 组长布置了心理弹性练习《沟通小能手》<br/> <input type="checkbox"/> 组员唱组歌结束</p> |                                                                                                                                                                           |

## 活动 5：爱的连结

组长: \_\_\_\_\_ 副组长: \_\_\_\_\_  
 日期: \_\_\_\_\_ 地点: \_\_\_\_\_  
 开始时间: \_\_\_\_\_ 结束时间: \_\_\_\_\_  
 开始时的组员数 \_\_\_\_\_ 结束时的组员数 \_\_\_\_\_

|                                       |                                                                                                                                                                                                                                                                                                                                                                                                                                                                                                                                                                                                                                                   |                                                                                                                                                                       |
|---------------------------------------|---------------------------------------------------------------------------------------------------------------------------------------------------------------------------------------------------------------------------------------------------------------------------------------------------------------------------------------------------------------------------------------------------------------------------------------------------------------------------------------------------------------------------------------------------------------------------------------------------------------------------------------------------|-----------------------------------------------------------------------------------------------------------------------------------------------------------------------|
| <p><b>在此注明取消，新增或变更活动的原因及调整建议：</b></p> | <p><i>活动 5.1 回顾与热身</i></p> <p><input type="checkbox"/> 依照建议完成<br/> <input type="checkbox"/> 依照建议完成，但有所改变<br/> <input type="checkbox"/> 未完成</p> <p><b>备注:</b></p>                                                                                                                                                                                                                                                                                                                                                                                                                                                                                  | <p><i>活动 5.3 主题活动《我的家人》</i></p> <p><input type="checkbox"/> 依照建议完成<br/> <input type="checkbox"/> 依照建议完成，但有所改变<br/> <input type="checkbox"/> 未完成</p> <p><b>备注:</b></p> |
|                                       | <p><i>活动 5.2 主题活动《爱的沟通》</i></p> <p><input type="checkbox"/> 依照建议完成<br/> <input type="checkbox"/> 依照建议完成，但有所改变<br/> <input type="checkbox"/> 未完成</p> <p><b>备注:</b></p>                                                                                                                                                                                                                                                                                                                                                                                                                                                                             | <p><i>活动 5.4 总结和任务布置</i></p> <p><input type="checkbox"/> 依照建议完成<br/> <input type="checkbox"/> 依照建议完成，但有所改变<br/> <input type="checkbox"/> 未完成</p> <p><b>备注:</b></p>    |
|                                       | <p><i>多选，选出符合以下条件的选项：</i></p> <p><input type="checkbox"/> 组员分享了心理弹性练习的完成情况<br/> <input type="checkbox"/> 组员分享了自己的成功日志<br/> <input type="checkbox"/> 组长带领组员回顾了积极沟通四部曲及上次活动的主题口号<br/> <input type="checkbox"/> 组长播放了视频《被骂了》<br/> <input type="checkbox"/> 组员讨论了如何与家人沟通<br/> <input type="checkbox"/> 组员在典型的与家长老师的冲突情境下练习了“自信+爱”的沟通<br/> <input type="checkbox"/> 组员画了家庭的美好时刻<br/> <input type="checkbox"/> 组员分享了自己的作品<br/> <input type="checkbox"/> 组长播放了歌曲《感恩的心》提升主题<br/> <input type="checkbox"/> 组员分享了本课所学<br/> <input type="checkbox"/> 组长总结并印花奖励<br/> <input type="checkbox"/> 组长布置了心理弹性练习《写给父母的一封信》<br/> <input type="checkbox"/> 组员唱组歌结束</p> |                                                                                                                                                                       |

## 活动 6：我的支持环

组长: \_\_\_\_\_ 副组长: \_\_\_\_\_  
 日期: \_\_\_\_\_ 地点: \_\_\_\_\_  
 开始时间: \_\_\_\_\_ 结束时间: \_\_\_\_\_  
 开始时的组员数 \_\_\_\_\_ 结束时的组员数 \_\_\_\_\_

|                                             |                                                                                                                                                                                                                                                                                                                                                                                                                                                                                                                                                                                                                             |                                                                                                                                                                          |
|---------------------------------------------|-----------------------------------------------------------------------------------------------------------------------------------------------------------------------------------------------------------------------------------------------------------------------------------------------------------------------------------------------------------------------------------------------------------------------------------------------------------------------------------------------------------------------------------------------------------------------------------------------------------------------------|--------------------------------------------------------------------------------------------------------------------------------------------------------------------------|
| <p><b>在此注明取消, 新增或变更活动的<br/>原因及调整建议:</b></p> | <p><b>活动 6.1 回顾与热身</b></p> <p><input type="checkbox"/> 依照建议完成<br/> <input type="checkbox"/> 依照建议完成, 但有所改变<br/> <input type="checkbox"/> 未完成</p> <p><b>备注:</b></p>                                                                                                                                                                                                                                                                                                                                                                                                                                                           | <p><b>活动 6.3 主题活动《我的支持环》(</b></p> <p><input type="checkbox"/> 依照建议完成<br/> <input type="checkbox"/> 依照建议完成, 但有所改变<br/> <input type="checkbox"/> 未完成</p> <p><b>备注:</b></p> |
|                                             | <p><b>活动 6.2 主题活动《爱的传递》</b></p> <p><input type="checkbox"/> 依照建议完成<br/> <input type="checkbox"/> 依照建议完成, 但有所改变<br/> <input type="checkbox"/> 未完成</p> <p><b>备注:</b></p>                                                                                                                                                                                                                                                                                                                                                                                                                                                      | <p><b>活动 6.4 总结与任务布置</b></p> <p><input type="checkbox"/> 依照建议完成<br/> <input type="checkbox"/> 依照建议完成, 但有所改变<br/> <input type="checkbox"/> 未完成</p> <p><b>备注:</b></p>      |
|                                             | <p><b>多选, 选出符合以下条件的选项:</b></p> <p><input type="checkbox"/> 组员分享了心理弹性练习的完成情况<br/> <input type="checkbox"/> 组员分享了自己的成功日志<br/> <input type="checkbox"/> 组长带领组员回顾了“自信+爱”的沟通及上次活动的主题口号<br/> <input type="checkbox"/> 组长播放了视频《爱是可以传递的》<br/> <input type="checkbox"/> 组员填写了练习卡片<br/> <input type="checkbox"/> 组员分享了自己的方法<br/> <input type="checkbox"/> 组长总结了彼此支持的主题<br/> <input type="checkbox"/> 组员画了自己的支持环<br/> <input type="checkbox"/> 组员分享了自己的支持环<br/> <input type="checkbox"/> 组员分享了本课所学<br/> <input type="checkbox"/> 组长总结并印花奖励<br/> <input type="checkbox"/> 组长布置了心理弹性练习《我的资源森林》<br/> <input type="checkbox"/> 组员唱组歌结束</p> |                                                                                                                                                                          |

## 活动 7：问题解决秘籍会

组长: \_\_\_\_\_ 副组长: \_\_\_\_\_  
 日期: \_\_\_\_\_ 地点: \_\_\_\_\_  
 开始时间: \_\_\_\_\_ 结束时间: \_\_\_\_\_  
 开始时的组员数 \_\_\_\_\_ 结束时的组员数 \_\_\_\_\_

|                                       |                                                                                                                                                                                                                                                                                                                                                                                                                                                                                                                                                                                                                                                                             |                                                                                                                                                                              |
|---------------------------------------|-----------------------------------------------------------------------------------------------------------------------------------------------------------------------------------------------------------------------------------------------------------------------------------------------------------------------------------------------------------------------------------------------------------------------------------------------------------------------------------------------------------------------------------------------------------------------------------------------------------------------------------------------------------------------------|------------------------------------------------------------------------------------------------------------------------------------------------------------------------------|
| <p><b>在此注明取消，新增或变更活动的原因及调整建议：</b></p> | <p><i>活动 7.1 回顾与热身</i></p> <p><input type="checkbox"/> 依照建议完成</p> <p><input type="checkbox"/> 依照建议完成，但有所改变</p> <p><input type="checkbox"/> 未完成</p> <p><b>备注:</b></p>                                                                                                                                                                                                                                                                                                                                                                                                                                                                                                        | <p><i>活动 7.3 主题活动《问题解决秘籍会》</i></p> <p><input type="checkbox"/> 依照建议完成</p> <p><input type="checkbox"/> 依照建议完成，但有所改变</p> <p><input type="checkbox"/> 未完成</p> <p><b>备注:</b></p> |
|                                       | <p><i>活动 7.2 主题活动《问题解决秘籍环》</i></p> <p><input type="checkbox"/> 依照建议完成</p> <p><input type="checkbox"/> 依照建议完成，但有所改变</p> <p><input type="checkbox"/> 未完成</p> <p><b>备注:</b></p>                                                                                                                                                                                                                                                                                                                                                                                                                                                                                                | <p><i>活动 7.4 总结与任务布置</i></p> <p><input type="checkbox"/> 依照建议完成</p> <p><input type="checkbox"/> 依照建议完成，但有所改变</p> <p><input type="checkbox"/> 未完成</p> <p><b>备注:</b></p>       |
|                                       | <p><i>多选，选出符合以下条件的选项：</i></p> <p><input type="checkbox"/> 组员分享了心理弹性练习的完成情况</p> <p><input type="checkbox"/> 组员分享了自己的成功日志</p> <p><input type="checkbox"/> 组长带领组员回顾了《我的支持环》的内容及主题口号</p> <p><input type="checkbox"/> 组长用故事的方式呈现了小专家的难题</p> <p><input type="checkbox"/> 组员讨论了秘籍一：冷静下来想办法</p> <p><input type="checkbox"/> 组员讨论了秘籍二：找人聊出好办法</p> <p><input type="checkbox"/> 组员讨论了秘籍三：积极行动最重要</p> <p><input type="checkbox"/> 组员讨论了秘籍四：效果不好再来过</p> <p><input type="checkbox"/> 组员完成了《问题解决秘籍会》活动</p> <p><input type="checkbox"/> 组员分享了本课所学</p> <p><input type="checkbox"/> 组长总结并印花奖励</p> <p><input type="checkbox"/> 组长布置了心理弹性练习《我的资源森林》</p> <p><input type="checkbox"/> 组员唱组歌结束</p> |                                                                                                                                                                              |

## 活动 8：阳光总在风雨后

组长: \_\_\_\_\_ 副组长: \_\_\_\_\_  
 日期: \_\_\_\_\_ 地点: \_\_\_\_\_  
 开始时间: \_\_\_\_\_ 结束时间: \_\_\_\_\_  
 开始时的组员数 \_\_\_\_\_ 结束时的组员数 \_\_\_\_\_

|                                        |                                                                                                                                                                                                                                                                                                                                                                                                                                                                                                                                                                                                                                                                                                                                                        |                                                                                                                                                                           |
|----------------------------------------|--------------------------------------------------------------------------------------------------------------------------------------------------------------------------------------------------------------------------------------------------------------------------------------------------------------------------------------------------------------------------------------------------------------------------------------------------------------------------------------------------------------------------------------------------------------------------------------------------------------------------------------------------------------------------------------------------------------------------------------------------------|---------------------------------------------------------------------------------------------------------------------------------------------------------------------------|
| <p><b>在此注明取消, 新增或变更活动的原因及调整建议:</b></p> | <p><b>活动 8.1 回顾与热身</b></p> <p><input type="checkbox"/> 依照建议完成<br/> <input type="checkbox"/> 依照建议完成, 但有所改变<br/> <input type="checkbox"/> 未完成</p> <p><b>备注:</b></p>                                                                                                                                                                                                                                                                                                                                                                                                                                                                                                                                                                                      | <p><b>活动 8.3 主题活动《阳光总在风雨后》</b></p> <p><input type="checkbox"/> 依照建议完成<br/> <input type="checkbox"/> 依照建议完成, 但有所改变<br/> <input type="checkbox"/> 未完成</p> <p><b>备注:</b></p> |
|                                        | <p><b>活动 8.2 主题活动《不折不挠林书豪》</b></p> <p><input type="checkbox"/> 依照建议完成<br/> <input type="checkbox"/> 依照建议完成, 但有所改变<br/> <input type="checkbox"/> 未完成</p> <p><b>备注:</b></p>                                                                                                                                                                                                                                                                                                                                                                                                                                                                                                                                                                              | <p><b>活动 8.4 总结与任务布置</b></p> <p><input type="checkbox"/> 依照建议完成<br/> <input type="checkbox"/> 依照建议完成, 但有所改变<br/> <input type="checkbox"/> 未完成</p> <p><b>备注:</b></p>       |
|                                        | <p><b>多选, 选出符合以下条件的选项:</b></p> <p><input type="checkbox"/> 组员分享了心理弹性练习的完成情况<br/> <input type="checkbox"/> 组员分享了自己的成功日志<br/> <input type="checkbox"/> 组长带领组员回顾了《问题解决秘籍会》的内容及主题口号<br/> <input type="checkbox"/> 组长播放了视频《不折不挠林书豪》<br/> <input type="checkbox"/> 组员讨论了林书豪的挫折遭遇及为何会成功<br/> <input type="checkbox"/> 组员总结了主题思想: 小挫折成就大梦想<br/> <input type="checkbox"/> 组员写出了自己的风雨事件<br/> <input type="checkbox"/> 组员抽签并以尊重的方式分享了自己抽到风雨事件<br/> <input type="checkbox"/> 组员写了阳光卡<br/> <input type="checkbox"/> 组员分享了阳光卡的内容<br/> <input type="checkbox"/> 组长播放了视频《每个挫折都有它的意义》并简短总结<br/> <input type="checkbox"/> 组员分享了本课所学<br/> <input type="checkbox"/> 组长总结并印花奖励<br/> <input type="checkbox"/> 组长布置了心理弹性练习《阳光总在风雨后》<br/> <input type="checkbox"/> 组员唱组歌结束</p> |                                                                                                                                                                           |

## 活动 9：我的未来不是梦

组长: \_\_\_\_\_ 副组长: \_\_\_\_\_  
 日期: \_\_\_\_\_ 地点: \_\_\_\_\_  
 开始时间: \_\_\_\_\_ 结束时间: \_\_\_\_\_  
 开始时的组员数 \_\_\_\_\_ 结束时的组员数 \_\_\_\_\_

|                                        |                                                                                                                                                                                                                                                                                                                                                                                                                                                                                                                                                                            |                                                                                                                                                                           |
|----------------------------------------|----------------------------------------------------------------------------------------------------------------------------------------------------------------------------------------------------------------------------------------------------------------------------------------------------------------------------------------------------------------------------------------------------------------------------------------------------------------------------------------------------------------------------------------------------------------------------|---------------------------------------------------------------------------------------------------------------------------------------------------------------------------|
| <p><b>在此注明取消, 新增或变更活动的原因及调整建议:</b></p> | <p><i>活动 9.1 回顾与热身</i></p> <p><input type="checkbox"/> 依照建议完成<br/> <input type="checkbox"/> 依照建议完成, 但有所改变<br/> <input type="checkbox"/> 未完成</p> <p><b>备注:</b></p>                                                                                                                                                                                                                                                                                                                                                                                                          | <p><i>活动 9.3 主题活动《我的未来不是梦》</i></p> <p><input type="checkbox"/> 依照建议完成<br/> <input type="checkbox"/> 依照建议完成, 但有所改变<br/> <input type="checkbox"/> 未完成</p> <p><b>备注:</b></p> |
|                                        | <p><i>活动 9.2 主题活动《神奇卡片》</i></p> <p><input type="checkbox"/> 依照建议完成<br/> <input type="checkbox"/> 依照建议完成, 但有所改变<br/> <input type="checkbox"/> 未完成</p> <p><b>备注:</b></p>                                                                                                                                                                                                                                                                                                                                                                                                     | <p><i>活动 9.4 总结与任务布置</i></p> <p><input type="checkbox"/> 依照建议完成<br/> <input type="checkbox"/> 依照建议完成, 但有所改变<br/> <input type="checkbox"/> 未完成</p> <p><b>备注:</b></p>       |
|                                        | <p><b>多选, 选出符合以下条件的选项:</b></p> <p><input type="checkbox"/> 组员分享了心理弹性练习的完成情况<br/> <input type="checkbox"/> 组员分享了自己的成功日志<br/> <input type="checkbox"/> 组长带领组员回顾了《阳光总在风雨后》的内容及主题口号<br/> <input type="checkbox"/> 组员完成了活动《神奇卡片》<br/> <input type="checkbox"/> 组长总结了主题信息: 每个人都是独特的, 拥有很多资源<br/> <input type="checkbox"/> 组员完成了活动《我的未来不是梦》<br/> <input type="checkbox"/> 组长总结了主题信息: 拥有理想, 实现理想, 行动很重要<br/> <input type="checkbox"/> 组员分享了本课所学<br/> <input type="checkbox"/> 组长总结并印花奖励<br/> <input type="checkbox"/> 组长布置了心理弹性练习《理想计划书》<br/> <input type="checkbox"/> 组员唱组歌结束</p> |                                                                                                                                                                           |

## 活动 10：让爱发光

组长: \_\_\_\_\_ 副组长: \_\_\_\_\_  
 日期: \_\_\_\_\_ 地点: \_\_\_\_\_  
 开始时间: \_\_\_\_\_ 结束时间: \_\_\_\_\_  
 开始时的组员数 \_\_\_\_\_ 结束时的组员数 \_\_\_\_\_

|                                        |                                                                                                                                                                                                                                                                                                                                                                                                                                                                                                                                                                                                                                                                                        |                                                                                                                                                                          |
|----------------------------------------|----------------------------------------------------------------------------------------------------------------------------------------------------------------------------------------------------------------------------------------------------------------------------------------------------------------------------------------------------------------------------------------------------------------------------------------------------------------------------------------------------------------------------------------------------------------------------------------------------------------------------------------------------------------------------------------|--------------------------------------------------------------------------------------------------------------------------------------------------------------------------|
| <p><b>在此注明取消, 新增或变更活动的原因及调整建议:</b></p> | <p><i>活动 10.1 回顾与热身</i></p> <p><input type="checkbox"/> 依照建议完成<br/> <input type="checkbox"/> 依照建议完成, 但有所改变<br/> <input type="checkbox"/> 未完成</p> <p><b>备注:</b></p>                                                                                                                                                                                                                                                                                                                                                                                                                                                                                                                     | <p><i>活动 10.3 主题活动《父母报告会》</i></p> <p><input type="checkbox"/> 依照建议完成<br/> <input type="checkbox"/> 依照建议完成, 但有所改变<br/> <input type="checkbox"/> 未完成</p> <p><b>备注:</b></p> |
|                                        | <p><i>活动 10.2 主题活动《我的心理弹性之旅》</i></p> <p><input type="checkbox"/> 依照建议完成<br/> <input type="checkbox"/> 依照建议完成, 但有所改变<br/> <input type="checkbox"/> 未完成</p> <p><b>备注:</b></p>                                                                                                                                                                                                                                                                                                                                                                                                                                                                                                            | <p><i>活动 10.4 爱的礼物</i></p> <p><input type="checkbox"/> 依照建议完成<br/> <input type="checkbox"/> 依照建议完成, 但有所改变<br/> <input type="checkbox"/> 未完成</p> <p><b>备注:</b></p>        |
|                                        | <p><i>多选, 选出符合以下条件的选项:</i></p> <p><input type="checkbox"/> 组员分享了心理弹性练习的完成情况<br/> <input type="checkbox"/> 组员分享了自己的成功日志<br/> <input type="checkbox"/> 组长带领组员回顾了《我的未来不是梦》的内容及主题口号<br/> <input type="checkbox"/> 组员学唱了歌曲《让爱发光》<br/> <input type="checkbox"/> 组长带领组员统整了十次活动的主要内容和所学技能<br/> <input type="checkbox"/> 组员分享了自己的感受<br/> <input type="checkbox"/> 组员选择了一次活动报告给家长<br/> <input type="checkbox"/> 每个组员都报告了自己的所学<br/> <input type="checkbox"/> 组员和家长分享了自己的感受<br/> <input type="checkbox"/> 组长送给每个组员一个卡片<br/> <input type="checkbox"/> 组员进行了证书颁发仪式<br/> <input type="checkbox"/> 组长总结并印花奖励<br/> <input type="checkbox"/> 共唱《让爱发光》结束小组活动<br/> <input type="checkbox"/> 请组员填写活动反馈表</p> |                                                                                                                                                                          |



# 附录3 儿童小组辅导的基本理念和技术

## 一、小组辅导基本技能

### 观察技巧

观察组员的言语和非言语行为，用眼睛识别不一致、混合信息、不协调和冲突。对非言语行为进行解释是要谨慎。要时刻看到他们的优点和长处，寻找正面的优点来战胜问题和困难，用他们自己的力量来解决问题。同时也要自我觉察自己与组员之间及组员与组员之间的互动。

### 积极倾听

积极倾听要求辅导员全身心地投入，并帮助组员扩充和丰富他们的故事，需要能听出他们的想法、情感和行为中发生的微妙变化。可以利用不断的鼓励、释义及总结三种基本技巧，通过提炼、简化和明确他们所说的话来帮助他们，使他们觉得自己被理解，一旦他们感觉自己的故事被真正的倾听，他们便会更为开放，做好准备做出改变。

释义和总结能让他们觉得你一直在倾听他们的谈话，鼓励可以让他们更全面地倾诉他们的想法。

鼓励包括点头、张开手、运用像“嗯哼”等肯定性短语，已经重复他们所说的话的关键词，适当的微笑以及关心。

释义是指反馈他们所说的话。通过简化并阐明他们的话来做到这一点。释义不是机械的重复，而是用你自己的话加上他们的话中的关键词。总结与释义相似，主要是用来阐明和提炼很长时间内所说的话或较复杂的话题，可以帮助思考和整理。

### 共情

罗杰斯 Rogers 对共情的解释是“咨询员能够正确地了解当事人内在的主观世界，并且能将有意义的信息传达给当事人。明了或察觉到当事人蕴涵着的个人意义的世界，就好像是你自己的世界，但是没有丧失这‘好像’的特质。”

#### 共情四部曲：

放下主观的参照标准 → 进行有效的观察倾听和辨别 → 尝试从当事人的参照标准  
→

来看事物和了解其感受 将自己的体认和感受有效地传递给当事人

辅导员加入一定的个人分享，可以更深刻地诱发组员做出更深入的自我探讨。组长要有能力为大家提供同感，进而成为众组员的模仿，是大家在彼此沟通是，亦有同感的体谅和关爱。

例如：当一位少年觉得老师故意侮辱他而表示愤怒和厌恶是，做出共情回应“**因为你觉得他当众侮辱责骂你，所以你感到很恼怒，而且憎恨他。**”

## 接纳

辅导员要承认每一个个体在任何一方面都是不同的，认识到每个人的人生过程都是一个很复杂的奋斗、思想和感受模式。以“他是谁？”的角度看待组员，无论他的行为如何，都把他视为一个有价值而独特存在的个体，接纳他，欣赏他。特别是对组员一些令我们反感和讨厌的行为，关键是要分清楚，当事人和他的行为是两回事。

## 尊重

接纳是尊重的先决条件。采用接纳的态度，把对方视为一个有价值而独特存在的个体。要对当事人有温暖的表现，还要关心和欣赏对方。除了对个别小组成员的接纳之外，还要整体上对小组有所接纳，信任小组自然又自由的运作。

表达尊重，主要是透过辅导员对组员的关注和聆听及适当的回应。关注就是要全神贯注，集中精神留意组员的一言一行，心无旁骛。并作诚实的分享，有开放的态度。注意脸部的表情、语调和用词恰当。开放的姿势、微笑和语调能表现尊重和热情。

## 真诚

辅导员需要开放自己，表里一致、真实可靠地，很自由又以真正的自己，投入到真实的辅导关系中。

真诚并不等于什么都可以随意说出来，而是要求所讲的要全部真诚，除非所说的有助于组员成长，否则就不用把所有知觉到的思想和感受都分享。辅导员在进行个人分享之前，还要小心观察时间是否恰当，不宜过早分享。

## 小组动力

在任何时间内发生在小组中的包括觉察到的或未被觉察到的所有心理的和行为的内容。这些内容是运作和支持小组持续下去的原因。

在这里主要指的是是具有治疗与促进成长功能的因素，如上面提到的尊重、真诚、共情、无条

件积极关注，辅导员的专注等。一个安全而温暖的环境可以诱导组员改变和成长。

## 灌注希望

在小组过程中，灌注和维持希望能够鼓励组员更有勇气和对社交产生更大的兴趣。透过组员各自的自我分析，组员往往会听到一些问题和自己的有相似之处，当看到其他人的金不是，得到启迪，并从中得到鼓舞。

辅导员可以通过以下方式向组员灌注希望：

- 1、发展积极的期望
- 2、对组员的进步做出关注和肯定
- 3、留意组员的进展
- 4、对那些愿意留在小组中继续寻求改进的组员予以积极的期望
- 5、对任何积极的行动做出鼓励
- 6、让组员彼此指出对方的进步
- 7、协助组员对本身及其他组员发展强而有力的感情联结
- 8、鼓励组员彼此做出认同学习

## 情绪抒泄

情绪抒泄就是将内心隐抑的情绪发泄出来。情绪抒泄只是当事人改变的开始，在抒泄之后协助他做出认知上的学习。

而且，只有当事人在情绪抒发过程中和事后能得到其他组员的接纳、尊重和温暖的表示，这种情绪抒发才是最有效的。辅导员要留意组员对别人抒发内心感受是的态度和反应。

情绪抒发既包括负面的情绪，也包括正面的情绪，鼓励组员公开表达自己的情绪和感受。

## 情感反映

情感反映包括观察情绪，为它们命名，并反馈给组员。识别情感可以通过问他一些开放式的问题，例如“你对那件事感受如何？”有时也要通过对言语的观察和非言语线索来推断或猜测他们的情感。例如，在谈论关心和爱戴自己父母时却紧握着拳头。情感反映一定要适时地满足对方的需要，有时候可以仅仅把观察到的情绪记载心里，可以在以后的评论中 useful。

## 发展社交技巧

社交技巧的发展，在小组辅导中具有很重要的治疗功能。组员可以透过不同的形式来学习。例

如角色扮演。组员只有在感觉到被接纳和尊重，大家都真诚相处，彼此体谅的时候才有胆量也才放心放下防御和伪装，坦诚和别人相处。因此，小组气氛很重要。

在安全的气氛中，组员开放坦诚地分享个人的感受和态度，其他组员尝试和学习。同时小组过程还可以协助组员在其中找到认同的对象，也可以透过观察别人的行为，对自己的困难有新的了解。这也需要辅导员细心的观察和良好的引导。例如，在一个小组中，当正协助一名组员处理他与父母的关系时，另一名组员表现出很激动的情绪，注意到这一点，在与前一名的探讨可稍作小休时，便邀请那名组员作些回馈和分享，结果他也刚好是类似的情形，在之前的探讨中感触很深，也看清了自己，并且他们立刻引起共鸣并互相支持和监督做出改变。

组员可以透过小组的交互经验，不但看清楚自己的社交情况，还可以具体学习基于对别人的信任和对别人的关爱所发展出来的有效沟通和融洽共处的方法。

## 二、哀伤情绪辅导

### 哀伤的类型

损失或丧失乃是人生命中不可避免和分割的一部分，丧失挚爱的亲友将带来沉重的打击与伤痛。艾滋孤儿可能会面临以下两种丧失：

#### 1 创伤性的丧失

相对于成长性丧失，创伤性丧失并非是每一个人必然或常有的经验，这种丧失带来的压力与创伤，源于它的突发和不可预测性 Machin(1990)。如挚爱亲朋去世等。

#### 3 预期性损失

有一些损失尚未真正发生，却又在人的预期之内，我们称之为预期性损失。这些预期的损失会为人带来预期性悲伤的反应。这些反应常见于被诊断患上长期疾病或不治之症的病人及其家属之中，虽然死亡的威胁并未迫在眉睫，但病者与家人已预期着随着病情的恶化，知道病者将不能如往昔般过正常、独立、自主的生活。

### 艾滋孤儿团体辅导过程中的哀伤问题的处理

1. 当儿童大声哭泣的时候：辅导员可以握着他的手，轻拍他的背部，或者在对方能够接受的情况下，拥抱他。
2. 当儿童表示不愿意谈的时候：告诉他我们心里也很难受，我们想通过这项研究来帮助他以及和他有相同经历的孩子。然后请他从逝去的父母的正向的回忆开始讲起。

3. 当儿童表示对于亲人的去世表示愤怒时：辅导员要给予充分的共情，理解他的愤怒，让他充分地表达愤怒、委屈和不满以及伤痛。引导他不将愤怒转向社会及周围的人，而是通过宣泄来化解悲愤。
4. 当儿童表现出否认亲人去世的时候：帮助他确认亲人已经去世了。让他回忆亲人去世前后的情况，丧礼的过程。握着他的手，轻拍他的背，拥抱他。
5. 当儿童表现出无助和绝望的时候：辅导员要帮助他意识到身边还有其他可利用的资源，比如机构能够提供他学习生活的机会，扩展家庭成员/抚养家庭成员依然关心他，有困难还可以寻求社会上的帮助，并且告诉他有哪些求助的方式。让他意识到，虽然亲人不在了，但周围的人以及整个社会都关心他，而且随着他自己慢慢长大，生存能力不断在提高，在周围人及社会的支持下，通过自身的努力将能够过更好的生活。
6. 当儿童表现出对访谈人员的愤怒时：辅导员可告诉对方，我们对他的状况感到很心疼，该研究是为了让社会更加重视艾滋孤儿的生存状况，为他们争取更多的社会援助，让他们的学习和生活更加健康快乐。
7. 当儿童对社会充满敌意时：辅导员可告诉他对于他所遭受的不幸感到无比心疼。事情的发生让人很难接受，社会和政府部分确实是要负一定的责任。但是，现在政府部门开始给予极大的关注，会有越来越多的政策和措施来保护他们的健康成长。愤怒和敌意会让自己的心情不好，会影响身体健康；而且有时，可能因为愤怒和敌意而作出一些不妥的行为，伤害到自己和他人。
8. 当儿童表现出对艾滋病的恐惧时：辅导员告诉他，是啊，艾滋病让他丧失了亲人，生活发生了非常不好的变化，给他带来了很多的伤痛。艾滋病确实可怕，但是你是安全的，健康的，艾滋病的传播途径很有限，艾滋病是可以预防的，你以后的生活中，只要懂得预防，就不会得病，就能够过一个健康正常的生活。
9. 当儿童表现出孤独时：辅导员可鼓励他和扩展家庭成员，抚养家庭成员，以及好朋友，表达他的哀伤。多和他人一起做事情，尤其是同学朋友等，一起学习，一起干活，一起聊天等等。另外还可以将自己的感受写下来，也可以给逝去的父母写信，表达自己对他们的想念，向他们保证自己要好好的生活。
10. 当儿童表现出报复的倾向时：首先表示对他的境遇感到心疼。“让你爸爸/妈妈感染上艾滋病的人确实很让人愤怒，政府已经对这些人进行重大的惩罚了。他们已经被送进监狱关起来了。一时冲动有报复的想法是可以理解的，但是一定不可以真的那么做。因为一旦那样做了，你自己就会违法社会法律，也会像他们那些做错事的人，受到社会的惩罚。报复是违法的，不可以那么做。”

## 三、小组组长的常遇到的问题及处理

### 组员打架

及时处理。注意同理当事人的情绪，先让双方都冷静下来，再了解事情原委，找到当事人在这件事情中的积极正面的点，加以肯定。比如良好的动机，没有让事情变得更糟等。尽量让双方都比较满意，愿意主动言和。

当然，小组组长要注意观察和积极协调组员之间的关系，尽量能防范于未然。

### 批评小组组长

在做所有工作之前，请确保自己能肯定自我的价值，自我接纳和自我欣赏。

让自己比较冷静，理性分析，消除自我防御。站在组员的立场上理解他为什么批评，思考他的批评是否有其依据，如果还有确实做得不是很好的地方，可以加以改进。注意尊重、真诚和无条件积极关注这些是否都做到了。

同时，从组员这类行为中，我们也能看到他们的态度，了解他们真实的需求，进一步清晰自己接下来要进行的工作。

### 不参与活动

寻找能够激起他们兴趣的方式或活动。如果是一直不参与，可适当的时候与其单独谈话，进行短暂的个别辅导，倾听、同理，了解他们的需要，明确他们不参与的真正原因，然后对症下药。如果是在某一次不参与，可以找出他过去参与的原因，分析他这一次不参与的原因，然后适当调整。当然也可个别交流。

另外，可以采用一些颇有吸引力的奖励，调动积极性。

### 大声嬉戏吵闹

可以强调小组最高品质：静悄悄。也可以结合奖励和惩罚的方式，如警告他如果再吵闹就会没收他已获得的奖励或者扣分。

### 有的孩子过于活跃，有的过于胆怯

如果小组中出现孩子的活跃性差别比较大时，可能会影响小组的氛围和效果。因此组长要想办

法让所有的孩子能够融入团体，有所体验。面对这种问题时，组长可以再次渲染小组团结的氛围，表达希望所有成员参与的愿望，也可以主动邀请比较胆怯的孩子，鼓励他们，强调无论他们表现如何，大家都会喜欢他们。同时也要注意安抚比较活跃的孩子，肯定和赞赏他们愿意把机会让给其他的同学。

## **沉浸于某个游戏当中，不愿配合其他活动**

在小组活动中，有些活动是比较有趣味性的，能够带动孩子的参与积极性，但也容易引发一个问题是，孩子想在同一个游戏活动中多玩几次，不愿转向新的活动内容，或者在不太好玩的游戏会表现出抗拒的情绪。这时候可能需要小组组长站在孩子的角度上去理解他的需要，引导孩子表达他的想法和情绪，欣赏他的表达，同理他的感受，同时表达小组组长的希望和担心。希望大家一起来进行活动，能够体验开心的同时也获得知识和技能，担心如果无法顺利进行，可能没办法达到预期的效果。

## 参考文献

- 赵俊峰, 李晓铭 (2010). *受艾滋影响儿童心理小组干预手册*. 河南大学
- 方晓义, 林丹华, 蔺秀云 (2010). *受艾滋影响儿童小组干预手册*. 北京师范大学.
- 林丹华 (2006). *中学生药物使用干预手册*. 北京师范大学.
- 林丹华 (2010). *流动儿童心理弹性干预手册*. 北京师范大学.
- 钟思嘉 (2005). *儿童青少年EQ夏令营活动手册*. 北京英泰智心咨询公司.
- Alvord, M. K., Zuker, B., & Grados, J. J. (2011). *Resilience Builder Program for Children and Adolescents*. Champaign, IL: Research Press
- Committee for Children. (2002). *Second Step grade 3 curriculum (3rd ed.)*. Seattle, WA: Author.
- Committee for Children. (2002). *Second Step grade 4 curriculum (3rd ed.)*. Seattle, WA: Author.
- Committee for Children. (2002). *Second Step grade 5 curriculum (3rd ed.)*. Seattle, WA: Author.
- Hofmann SG (2011). *An Introduction to Modern CBT. Psychological Solutions to Mental Health Problems*. Chichester, UK: Wiley-Blackwell.
- Kusche, C. A., & Greenberg, M. T. (1994). *The PATHS curriculum*. Seattle: Developmental Research and Programs.
- Shochet, I. Holland. D., & Whitefield, K. (2001). *Resourceful Adolescent Program*. Queensland University of Technology.
- Spelman, C. M., & Parkinson K. (2000). *When I Feel Sad (The Way I Feel Book Series)*. W Park Ridge, IL: hitman, Albert & Company.
- Spelman, C. M., & Cote, N. (2000). *When I Feel Angry (The Way I Feel Book Series)*. W Park Ridge, IL: hitman, Albert & Company.
- Satir, V. (1988). *The new people making*. Mountain View, CA: Science and Behavior Books.



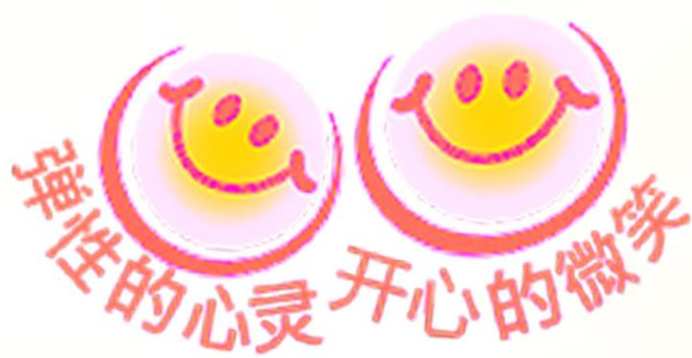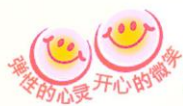

河南大学中美国际合作研究课题制作

# 儿童心理弹性项目

家长学校

爱

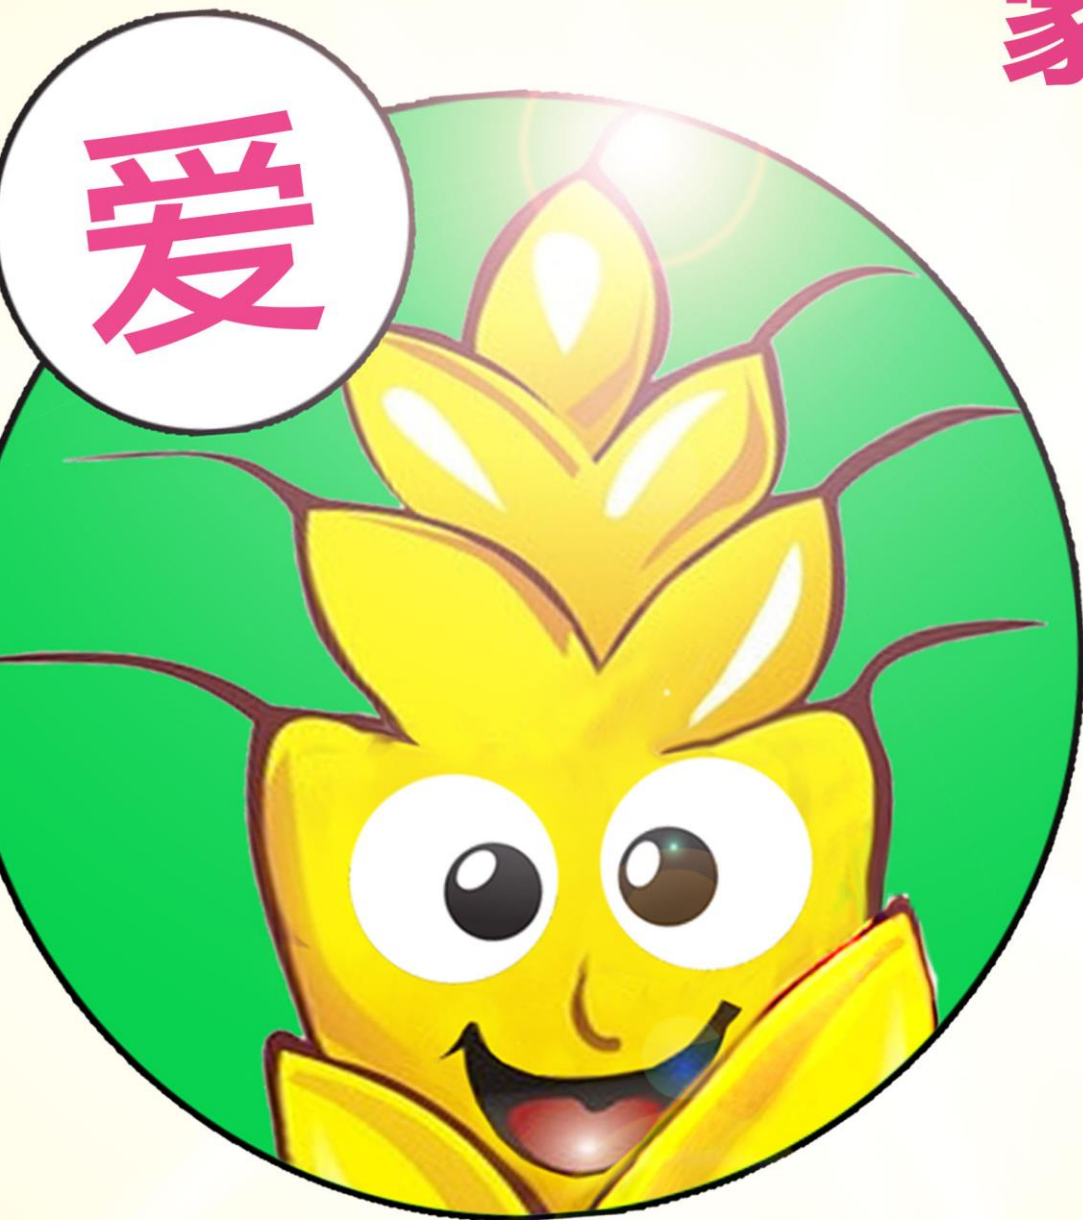

## 教师培训手册

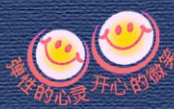

河南大学中美国际合作研究课题制作

项目培训内部资料，请注意保密！

# 儿童心理弹性项目 家长学校教师培训手册

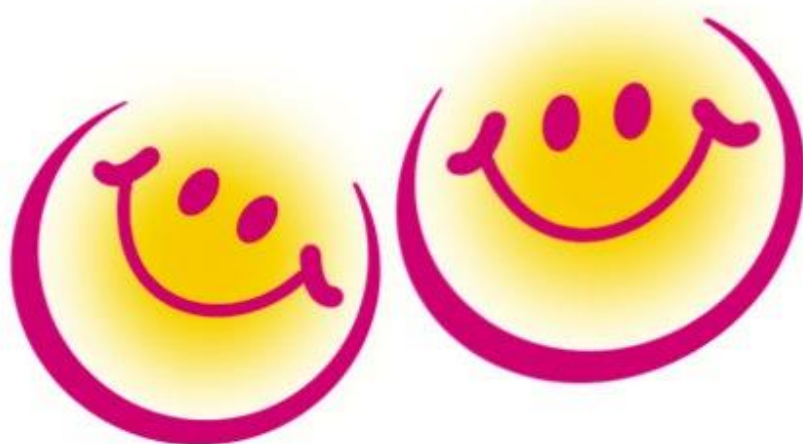

弹性的心灵，开心的微笑

培训日期：2013年5月

教师姓名：\_\_\_\_\_

# 目录

|                              |    |
|------------------------------|----|
| 第一部分 .....                   | 1  |
| 项目及手册使用介绍 .....              | 1  |
| 一、我们要做什么? .....              | 2  |
| 二、家长学校进行的时间、场地、主讲、及参与家长..... | 3  |
| 三、如何使用本手册 .....              | 3  |
| 四、研究质量评估 .....               | 3  |
| 五次活动内容一览表 .....              | 4  |
| 五、研究伦理与消极情绪处理.....           | 5  |
| 六、家长学校/团体心理辅导的基本技术 .....     | 5  |
| 第二部分 .....                   | 9  |
| 家长学校方案 .....                 | 9  |
| 第一次麦子需要空气，孩子需要关爱.....        | 11 |
| 一、项目介绍 .....                 | 12 |
| 二、破冰活动：天气预报.....             | 14 |
| 三、主题活动：用爱耕耘.....             | 16 |
| 四、主题活动：我家麦子.....             | 18 |
| 五、总结及预告 .....                | 20 |
| 第二次麦子需要施肥，孩子需要教育.....        | 21 |
| 一、热身及复习 .....                | 22 |
| 二、主题活动：麦子的需要.....            | 23 |
| 三、主题活动：给麦子施肥.....            | 27 |
| 四、总结及预告 .....                | 28 |
| 第三次麦子需要灌溉，孩子需要沟通.....        | 29 |
| 一、热身及复习 .....                | 30 |
| 二、主题活动：不自信的麦子.....           | 32 |
| 三、主题活动：跟孩子沟通.....            | 34 |
| 四、总结及预告 .....                | 38 |
| 第四次麦子需要阳光，孩子需要欣赏.....        | 39 |
| 一、热身及复习 .....                | 40 |
| 二、主题活动：做孩子生命中的贵人.....        | 41 |
| 三、主题活动：独特的麦子.....            | 42 |
| 四、总结及预告 .....                | 45 |
| 第五节做健康快乐的麦子家长.....           | 47 |
| 一、热身及复习 .....                | 48 |
| 二、主题活动：你帮我，我帮你.....          | 49 |

|                                       |    |
|---------------------------------------|----|
| 三、主题活动：笑一笑，烦恼跑.....                   | 50 |
| 四、回顾与结束 .....                         | 53 |
| 附录 .....                              | 54 |
| 第三部分 .....                            | 55 |
| 附录 .....                              | 55 |
| 附录 1 家长学校实施的忠诚度评估表（助手填写） .....        | 57 |
| 附录 2 主讲老师自我效能自评表（培训后老师填写） .....       | 69 |
| 附录 3 主讲老师自我总结（每一次家长学校活动后主讲老师填写） ..... | 71 |
| 附录 4 家长对每一次活动评估卡（每一次活动后家长填写） .....    | 73 |
| 附录 5 家长反馈表（家长学校五次活动结束后家长填写） .....     | 75 |

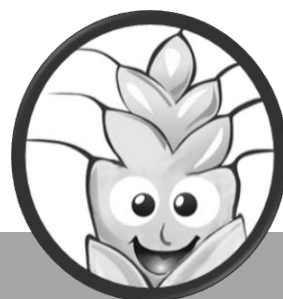

# 第一部分

## 项目及手册使用介绍

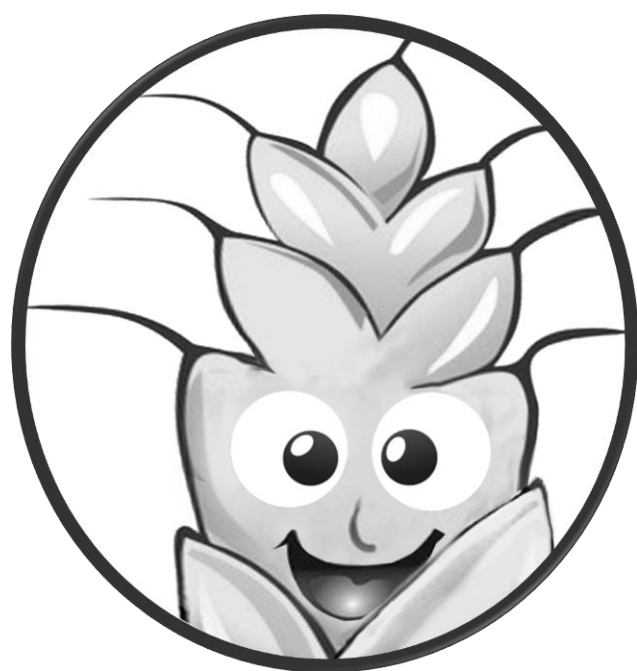

## 一、我们要做什么？

这是一项儿童心理健康促进的科研项目。根据以往研究理论，身处逆境的儿童如果有良好的家庭环境及社会环境，仍然能够获得健康的发展，在逆境中发展出一种心理品质——心理弹性。在这个项目中，我们希望通过家长学校的方式，向受艾影响儿童的主要抚养者传递积极的教育理念和教育方法，从而为儿童成长提供良好的家庭环境和氛围。我们希望通过本方案使家长们获得以下的知识和技能：

1. 与孩子建立积极依恋关系
2. 孩子的发展与需要
3. 积极的教养技能
4. 积极合理的期望
5. 家长的自我照顾

家长学校方案的设计主要根据认知行为治疗(e.g.,Hollon, Derubeis, & Seligman, 1992), 系统沟通理论(e.g., Satir 家庭沟通理论, 1967), SAMSHA (美国物质滥用和心理健康服务协会) 模式的项目 (Tripe P), 澳大利亚青少年心理弹性促进项目 (Resourceful Adolescent Program), 和美国加州 TALC 项目 (Teens and Adults Learning to Communicate)。

在家长参加家长学校的同时，儿童也将接受以心理弹性为核心的 10 次心理健康促进团体活动。这 10 次活动由我们项目组的心理学研究生担任活动的带领者。在最后一次活动时，我们的研究生会邀请家长参加儿童团体活动报告会，听取学生在活动中的心得和收获。

家长学校和儿童团体活动的最终目的是要通过提升儿童生活中的积极影响因素（如儿童的抗压能力、问题解决能力、寻求帮助的能力、家长提供的积极教养环境、家长对孩子的用心照顾与关注），从而减少父母去世及生病对孩子的消极影响，提高孩子的心理弹性，能够让孩子在现在以及将来的困难挑战仍然健康成长。

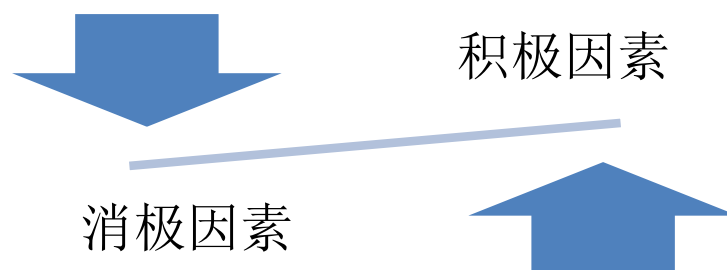

## 二、家长学校进行的时间、场地、主讲、及参与家长

1. 时间：家长学校以学校为单位进行，可根据实际情况调整五次活动的进行时间。可分五次进行，也可以集中在一天半完成。
2. 场地：利用学校教室。
3. 人员：家长学校的主讲为在座各位老师，每位老师配备一名河南大学的研究生作为助手，助手将协助老师一起准备讲课材料（如 PPT，海报等），在家长学校进行时，助手协助准备电子设备（如幻灯投影），协助小组讨论。
4. 参与家长：根据项目组成员发放的名单，要求名单上的全部家长参加。家长学校的人员规模在 20 至 40 人左右，有的学校名单上的家长较多，可分 2-3 次完成家长学校的课程内容。

## 三、如何使用本手册

方案共包括 5 次家长学校课程，每次课程包含两个小节，每个小节约 40-45 分钟。在方案执行的过程中，不受干扰的环境非常重要。主讲老师与助手在实施干预中需要承担以下责任：

1. 接受家长学校技能培训
2. 能够熟练操作活动方案
3. 每次家长学校之前进行充分准备
4. 完成质量评估信息收集

手册包含两个部分：

1. 家长学校方案（文本）

本手册详细记录了所有活动内容，指导语（斜体字，指导语可以根据老师自己的习惯以及当地的实际情况做适当改动）。

活动材料需要主讲老师与助手按照要求自行准备。

2. 方案 PPT+活动视频

## 四、研究质量评估

本项目的研究目标之一是探讨家长学校在提升父母积极教养态度和技能的作用和有效性。因此在项目进行过程中，我们要考查一下几个指标来评估项目实施过程。

1. 家长学校实施的忠诚度评估表（助手填写，附录 1）
2. 主讲老师自我效能自评表（老师填写，附录 2）
3. 主讲老师自我总结（老师填写，附录 3）
4. 家长对每一次活动评估卡（家长填写，附录 4）
5. 家长反馈表（家长填写，附录 5）
6. 每次家长学校随机录音 15 分钟（助手完成）



## 五次活动内容一览表

|   | 课程                | 主题             | 总目标                                                                                                                                                                                                                       |
|---|-------------------|----------------|---------------------------------------------------------------------------------------------------------------------------------------------------------------------------------------------------------------------------|
| 一 | 麦子需要空气<br>孩子需要关爱  | 家长的在孩子成长中的重要性  | <ol style="list-style-type: none"> <li>1. 与家长建立良好关系</li> <li>2. 介绍家长学校的目的、内容以及时间安排</li> <li>3. 用爱耕耘：通过家长分享教养孩子的成功经验提升家长的自我效能感</li> <li>4. 我家麦子：帮助家长认识到孩子的优点和独特之处</li> <li>5. 身教是最好的教育：使家长认识到自己的关爱对孩子的成长具有深刻的影响</li> </ol> |
| 二 | 麦子需要肥料，<br>孩子需要教育 | 赏罚分明：外化问题的教养技能 | <ol style="list-style-type: none"> <li>1. 复习上一次的内容：麦子需要空气，孩子需要关爱</li> <li>2. 了解孩子问题行为背后的心理需要</li> <li>3. 针对孩子的外化问题行为，学习有效的赏罚分明方法</li> </ol>                                                                               |
| 三 | 麦子需要灌溉，<br>孩子需要沟通 | 倾听沟通：内化问题的教养技能 | <ol style="list-style-type: none"> <li>1. 复习第二次的內容：问题麦子行为背后的需要、教养孩子有效的方法—有效赏罚</li> <li>2. 了解不自信孩子的心理需求，说明称赞及表扬的重要</li> <li>3. 学习及演练有效的沟通方法，灌溉不自信的麦子</li> </ol>                                                            |
| 四 | 麦子需要阳光，<br>孩子需要欣赏 | 积极的合理的期望       | <ol style="list-style-type: none"> <li>1. 复习第三次的內容：有效沟通—用心听和用心说（内功+外功）</li> <li>2. 学习使用沟通方法跟孩子表达欣赏和鼓励</li> <li>3. 表达对孩子未来的积极的期望</li> </ol>                                                                                |
| 五 | 做健康快乐的麦子家长        | 自我照顾：养身+养心     | <ol style="list-style-type: none"> <li>1. 复习第四次的內容：欣赏孩子，每一个孩子都是独特的</li> <li>2. 鼓励家长的付出</li> <li>3. 学习自我照顾的两种方法：社会支持与自我调节</li> </ol>                                                                                       |

# 五、研究伦理与消极情绪处理

## 1. 保密原则

- 研究者必须确保所有被试的隐私受到保护。

如果被试在研究中给予了信息，他们是出于信任关系。他们希望这些信息可以仅用于研究中。

- 参与项目的老师必须确保从被试那里获得的信息不外传。
- 为了确保机密性，老师需要：
  1. 用编码替代标识符（比如，姓名）；
  2. 去掉获得研究工具（如表格）中标有姓名/地址的页面；
  3. 限制可识别被试身份的数据的获得；
  4. 在安全地方保存纸笔记录；
  5. 对电脑记录设置安全密码。

## 2. 尊重原则

- 在被试非自愿暴露与 HIV 有关信息时，不能触及有关的问题
- 对访谈过程中被访谈者消极情绪的恰当处理

## 3. 典型情绪问题的处理

- 当家长哭泣的时候：老师可以握着他/她的手，轻拍他/她的背部，或者在对方能够接受的情况下，拥抱他/她。
- 当家长表示不愿意谈的时候：告诉他我们心里也很难受，我们想通过这项研究来帮助他/她以及和他们有相同经历的家庭。
- 当家长表示对于亲人的去世表示愤怒时：老师要给予充分的共情，理解他/她的愤怒，让他/她充分地表达愤怒、委屈和不满以及伤痛。引导他不将愤怒转向社会及周围的人，而是通过宣泄来化解悲愤。
- 当家长表现出无助和绝望的时候：老师要帮助他/她意识到身边还有其他可利用的资源，比如有困难还可以寻求社会上的帮助，并且告诉他有哪些求助的方式。让他意识到，周围的人以及整个社会都关心他。
- 当某些家长表现出对艾滋病的恐惧时：老师可以告诉他/她，艾滋病确实可怕，但是你是安全的，健康的，艾滋病的传播途径很有限，艾滋病是可以预防的，你以后的生活中，只要懂得预防，就不会得病，就能够过一个健康正常的生活。

# 六、家长学校/团体心理辅导的基本技术

## 观察技巧

观察家长的言语和非言语行为，用眼睛识别不一致、混合信息、不协调和冲突。对非言语行为进行解释是要谨慎。要时刻看到他们的优点和长处，寻找正面的优点来战胜问题和困难，用他们自己的力量来解决问题。同时也要自我觉察自己与家长之间及家长与家长之间的互动。

## 积极倾听

在进行家长学校时，要求老师全身心地投入，并帮助家长扩充和丰富他们的故事，需要能听出他们的想法、情感和行为中发生的微妙变化。可以利用不断的鼓励、释义及总结三种基本技巧，通过提炼、简化和明确他们所说的话来帮助他们，使他们觉得自己被理解，一旦他们感觉自己的故事被真正的倾听，他们便会更为开放，做好准备做出改变。

释义和总结能让他们觉得你一直在倾听他们的谈话，鼓励可以让他们更全面地倾诉他们的想法。

鼓励包括点头、张开手、运用像“嗯哼”等肯定性短语，已经重复他们所说的话的关键词，适当的微笑以及关心。

释义是指反馈他们所说的话。通过简化并阐明他们的话来做到这一点。释义不是机械的重复，而是用你自己的话加上他们的话中的关键词。总结与释义相似，主要是用来阐明和提炼很长时间内所说的话或较复杂的话题，可以帮助思考和整理。

## 共情

人本主义心理学家罗杰斯（Rogers）对共情的解释是“咨询员能够正确地了解当事人内在的主观世界，并且能将 meaningful 的信息传达给当事人。明了或察觉到当事人蕴涵着的个人意义的世界，就好像是你自己的世界，但是没有丧失这‘好像’的特质。”

### 共情四部曲：

放下主观的参照标准→进行有效的观察倾听和辨别→尝试从当事人的参照标准来看事物和了解其感受→将自己的体认和感受有效地传递给当事人

老师加入一定的个人分享，可以更深刻地诱发家长做出更深入的自我探讨。老师要有能力为大家提供共情的榜样，进而成为众家长的模仿，使大家在彼此沟通时，亦有同样的体谅和关爱。

## 接纳

老师在课程中要承认每一个个体在任何一方面都是不同的，认识到每个人的人生过程都是一个很复杂的奋斗、思想和感受模式。以“他是谁？”的角度看待家长，无论他的行为如何，都把他视为一个有价值而独特存在的个体，接纳他，欣赏他。特别是对家长一些令我们反感和讨厌的行为，可以看到行为背后的原因和渴望。

## 尊重

接纳是尊重的先决条件。采用接纳的态度，把对方视为一个有价值而独特存在的个体。要对家长有温暖的表现，还要关心和欣赏对方。表达尊重，主要是透过老师在课程中对家长的关注和聆听及适当的回应。关注就是要全神贯注，当家长发言时，集中精神留意家长的一言一行，心无旁骛。并作诚实的分享，有开放的态度。注意脸部的表情、语调和用词恰当。开放的姿势、微笑和语调能表现尊重和热情。

## 真诚

老师需要开放自己，表里一致、真实可靠地，很自由又以真正的自己，投入到真实的团体的关系中。

真诚并不等于什么都可以随意说出来，而是要求所讲的要全部真诚，除非所说的有助于家长或整个家长团体的成长，否则就不用把所有知觉到的思想和感受都分享。老师在进行个人分享之前，还要小心观察时间是否恰当，不宜过早分享。

## 团体动力

在任何时间内发生在家长团体中的包括觉察到的或未被觉察到的所有心理和行为的內容。这些内容是运作和支持团体持续下去的原因。

在这里主要指的是是具有治疗与促进成长功能的因素，如上面提到的尊重、真诚、共情、无条件积极关注，老师的专注等。一个安全而温暖的环境可以引导家长改变和成长。

## 灌注希望

在小组过程中，灌注和维持希望能够鼓励家长更有勇气和对社交产生更大的兴趣。透过家长各自的自我分享，家长往往会听到一些问题和自己的有相似之处，看到其他人的解决方法，得到启迪，并从中得到鼓舞。

老师可以通过以下方式向家长灌注希望：

- 1、老师自身示范积极的心理，积极面对未来
- 2、对家长的进步做出关注和肯定
- 3、对任何积极的行动做出鼓励
- 4、让家长彼此指出对方的进步
- 5、协助家长对本身及其他家长发展强而有力的感情联结
- 6、鼓励家长彼此学习

## 情绪抒泄

情绪抒泄就是将内心压抑的情绪发泄出来。情绪抒泄只是当事人改变的开始，在抒泄之后协助他做出认知上的学习。

而且，只有家长在情绪抒发过程中和事后能得到其他家长的接纳、尊重和温暖的表示，这种情绪抒发才是最有效的。老师要留意家长对别人抒发内心感受是的态度和反应。

情绪抒发既包括负面的情绪，也包括正面的情绪，鼓励家长公开表达自己的情绪和感受。

## 发展社交技巧

社交技巧的发展，在团体心理辅导中具有很重要的治疗功能。家长可以透过不同的形式来学习。例如角色扮演。家长只有在感觉到被接纳和尊重，大家都真诚相处，彼此体谅的时候才有胆量也才放心放下防御和伪装，坦诚和别人相处。因此，团体气氛很重要。

在安全的气氛中，家长开放坦诚地分享个人的感受和态度，其他家长尝试和学习。同时团体过程还可以协助家长在其中找到认同的对象，也可以透过观察别人的行为，对自己的困难有新的了解。这也需要老师细心的观察和良好的引导。例如，在一个团体中，当正协助一名家长处理他与孩子的关系时，另一名家长表现出很激动的情绪，注意到这一点，在与前一名的探讨可稍作小休时，便邀请那名家长作些回馈和分享，结果他也刚好是类似的情形，在之前的探讨中感触很深，也看清了自己，并且他们立刻引起共鸣并互相支持和监督做出改变。

家长可以透过团体的交互经验，不但看清楚自己的社交情况，还可以具体学习基于对别人的信任和对别人的关爱所发展出来的有效沟通和融洽共处的方法。

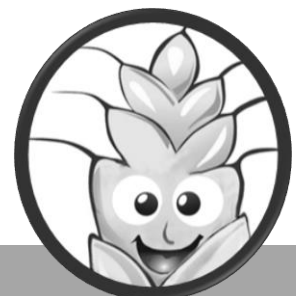

# 第二部分

## 家长学校方案

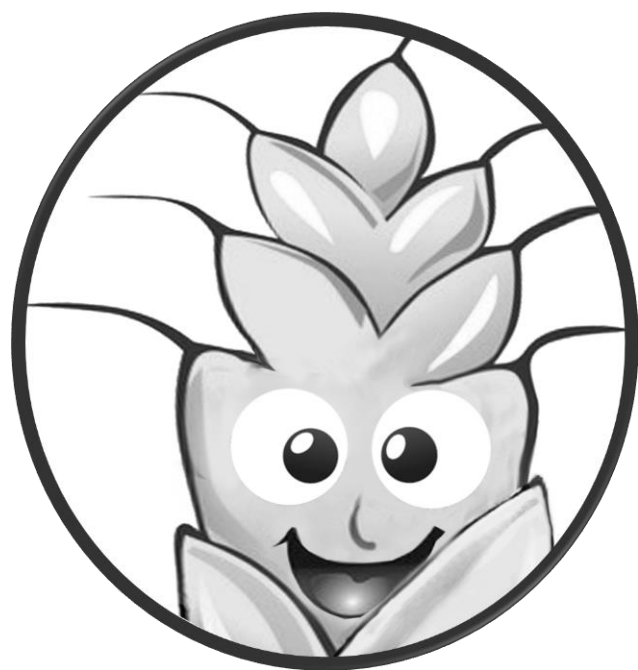

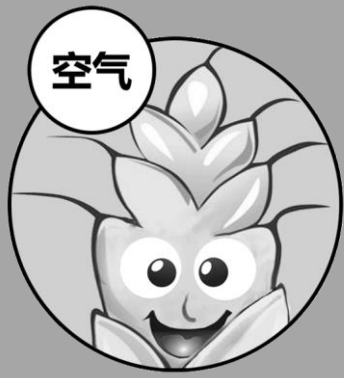

# 弹性的心灵 开心的微笑

## 第一次麦子需要空气，孩子需要关爱

### 活动目的：

1. 与家长建立良好关系
2. 介绍家长学校的目的、内容以及时间安排
3. 用爱耕耘：通过家长分享教养孩子的成功经验提升家长的自我效能感
4. 我家麦子：帮助家长认识到孩子的优点和独特之处
5. 身教是最好的教育：使家长认识到自己的关爱对孩子的成长具有深刻的影响

### 活动流程

|             |                                                                                         |       |
|-------------|-----------------------------------------------------------------------------------------|-------|
| 一、项目介绍      | 1.自我介绍及项目介绍<br>2.建立家长学校规则                                                               | 10 分钟 |
| 二、破冰游戏：天气预报 | 1.天气预报<br>2.介绍五次活动                                                                      | 10 分钟 |
| 三、主题活动：用爱耕耘 | 1. 播放视频《苹果树与男孩》<br>2. 邀请家长分享观后感肯定家长为孩子做的一切                                              | 30 分钟 |
| 四、主题活动：我家麦子 | 1. 播放《长江七号》片段<br>2. 邀请家长分享自家孩子的可爱之处<br>3. 帮助家长认识到自己对孩子成长过程的至关重要影响<br>4. 帮助家长认识到身教是最好的教育 | 30 分钟 |
| 五、总结及劬      | 老师总结                                                                                    | 10 分钟 |

### 活动材料

1. 第一次教案及 PPT
2. 笔记本电脑
3. 小型音箱
4. 投影仪
5. 视频《长江七号》
6. 视频《苹果树与男孩》
7. 小礼物
8. 麦子扑克牌
9. 助手准备相机拍照（持续 4 次，最后一次洗出照片送给家长作为礼物）

## 一、项目介绍

**目标：**组长自我介绍，并向家长介绍项目的目的、内容以及时间安排

**时间：**10 分钟

**材料：**第一次教案及 PPT  
麦子扑克牌

### 要点：

1. 激发家长参与的兴趣
2. 强调参与活动的好处：除了可以帮到孩子之外，还能帮到自己
3. 与家长建立良好关系

### 1. 自我介绍

自我介绍的内容包括名字、学校以及助手的信息等。

#### 老师的话：

大家好！欢迎大家来到家长学校。我是这一次活动的老师，名字叫 XXX，大家可以叫我 X 老师。这是我的助手 XXX，他/她是河南大学的研究生（请助手自我介绍）。我们会一起度过 5 次的活动，五次活动中，我们会通过观看视频、角色扮演、游戏等方式一起讲讲教育孩子的经验，学习教育孩子的新方法，还会谈谈如何照顾自己。过程中希望各位家长积极参与，会有一些小礼物送给积极参与的家长。

### 2. 项目介绍

#### 1) 目的

老师在介绍时要注意共情家长抚养孩子的压力，肯定家长对孩子的付出，激发家长持续参与五次家长学校的兴趣。

#### 老师的话：

作为家长的我们，我相信生活上没有什么比我们孩子好更重要了，对吧？为了孩子们可以更好地面对生活的困难，我们聚在这里，一起讨论养育教育孩子的经验。有时候孩子会出现让我们头痛的问题，我们会从心理学的角度给大家支持，来面对抚养孩子过程中的压力。在这个过程中，我们会看到大家在养育孩子做得很好的地方，同时，我们会一起通过各种项目专门设计的活动（比如扑克牌）来学习一些有效教养孩子的技能。您的孩子也同时参加了孩子版的集体活动，在孩子的最后一次活动中，孩子的老师会邀请您参加，听取孩子的报告会。

#### 2) 实施形式及时间

老师根据具体实施情况向家长介绍时间安排（如，一天进行完或分几次进行完）

#### 3) 显示并解释活动规则

### 活动规则

1. 按时：按时参加家长学校
2. 尊重：不打探和揭露别人的隐私。
3. 聆听：不中断别人、不取笑别人。
4. 积极：真诚自由的表达自己的想法和观点。
5. 保密：对组员分享的内容保密。
6. 不评判别人：即使自己不同意别人的想法，也能尊重对方，不对对方进行评判。

### 老师的话：

希望大家在家长学校中都能度过愉快的时光，为了可以让大家更顺利地进行每次的活动，我为大家准备了一些规则，大家觉得有没有问题呢？有些什么需要补充的吗？若大家都同意，那么我们就在以后的家长学校中都一起来遵守。



## 二、破冰活动：天气预报

**目标：**1. 透过游戏“天气预报”打破陌生，营造轻松的气氛  
2. 带出比喻“抚养孩子就如种麦子”

**时间：**10 分钟

**材料：**第一次教案及 PPT

**要点：**

1. 熟练游戏指令及动作：小风、大风、小雨、大雨及狂风暴雨
2. 通过农夫种麦子的比喻带出“养育孩子的过程就如同种麦子的过程”

### 1. 游戏《天气预报》

游戏规则如下：

#### 《天气预报》游戏规则：

跟随老师的指令做动作

指令包括：

- (1) 小风：轻轻地摩擦双手
- (2) 大风：大力摩擦双手
- (3) 小雨：五指轻轻地拍
- (4) 大雨：拍掌
- (5) 狂风暴雨：跟旁边的家长互相按摩肩膀

老师的话：

大家在家中都有种地吧？种地要靠天吃饭，天气对我们很重要。天气很冷，咱们做一个小热身活动让大家暖和暖和——天气预报

### 2. 用农夫种麦子的比喻带出“养育孩子就如种麦子”，介绍五次活动的主题。

呈现 PPT 中的《麦子养分图》。

老师的话：

咱们河南最有代表性的农作物当然是麦子，咱们都哪位家里种了麦子？为了让麦子有好的收成，我们都做了哪些努力？其实种麦子的过程就如养育孩子一样，教育孩子过程中，我们也付出了很多努力，希望他们可以健康成长。这里我们做个比喻，看看种麦子和养育孩子有什么相似的地方。种麦子需要四种养分，那么孩子成长中最需要什么？这四个主题将是我们 1-4 次家长学校的主要内容，第五次我们会讲一讲如何照顾自己，如何做健康快乐的家长。

1. 麦子需要空气，孩子需要关爱
2. 麦子需要肥料，孩子需要教育“有效的教育方法”
3. 麦子需要灌溉，孩子需要沟通“良好沟通”
4. 麦子需要阳光，孩子需要鼓励“赞赏和肯定”

### 老师的话:

以大家的经验，要让咱们的麦子茁壮成长，我们要为麦子提供什么呢？有4个很关键的因素，空气、水、阳光和肥料。对我们的孩子也是如此。

**空气：**空气是万物生长最重要的养分。缺氧的地方不能种出好麦子，我们在养育孩子的过程中也要给予孩子最基本的养分——爱和支持。我们第一次家长学校会谈如何与孩子建立这种有爱和支持的依恋关系。

**肥料：**麦子有时候不会长得如我们预期的那样，有时候出一些问题，会有哪些问题呢？有时候被虫咬了，变黄了，这个时候我们要做什么呢？要施肥。对孩子也是如此，有时候孩子会出现一些让我们头痛的问题，这个时候我们要对症下药，让孩子回到健康的方向上。第二次家长学校，我们会讲讲如何处理孩子的学习和行为问题（比如，厌学、撒谎、打架等等）。

**灌溉：**水也是种麦子必不可少的东西。如果没有水，麦子会枯萎。孩子遇到压力的时候也像如此，遇到压力之后孩子可能会觉得没有自信，蔫了，这时我们就要为他灌溉，通过有效的方法跟他沟通，恢复他们的自信。第三次家长学校，我们的主题就是如何与不自信的孩子良好的沟通。

**阳光：**阳光是麦子成长的重要条件。温暖的阳光就如我们对孩子的欣赏和赞赏，孩子在阳光底下会更有力量。第四次我们的主题是如何欣赏孩子，鼓励孩子。

今天是第一次，我们就从最基本的因素开始——空气：爱和支持开始。

### 三、主题活动：用爱耕耘

**目标：**通过观看视频和经验分享，肯定家长对孩子的付出以及对孩子的爱

**时间：**30 分钟

**材料：**第一次教案及 PPT

视频《苹果树与男孩》

**要点：**

1. 通过对视频人物的分析，作为线索带领家长分享自己为孩子的默默付出
2. 当家长分享自己如何影响孩子时，要求老师对家长做的好的地方进行肯定

#### 1. 播放视频《苹果树与男孩》

##### 故事《苹果树与小男孩》

有一棵苹果树。有一个小男孩每天都喜欢来跟苹果树玩。他上树摘苹果吃，在树荫里打盹，他爱这棵苹果树，苹果树也爱他。

时光飞快的过去。小男孩变成了大男孩。他不再跟苹果树玩了。一天，男孩回到苹果树身旁，他看起来很难过。

“来跟我玩一会吧。”苹果树对他说。

“我不是小孩子了，我不会爬树了，我需要玩具，我需要钱买玩具。”小男孩说。

“对不起，我没有钱。不过你可以把我所有的苹果摘下来拿去卖钱。”苹果树回答他。

小男孩打起精神来，它把所有的苹果摘光了，然后快乐地离去。

摘了苹果后，小男孩再没有来看过苹果树，直到他长成一个男人。一天，回到苹果树这里。

#### 2. 分享观看后的感受，说明家长就是孩子背后的苹果树，为他们默默支持。

老师的话：

大家看完了有什么感受呢？大家看到那颗苹果树想到什么吗？我们平时是不是都是这样做的呀？苹果树就是指我们默默为孩子付出的家长们。我们为了我们所爱的孩子们，我们愿意为他们做很多的事。

#### 3. 分享为孩子默默做过的事，以及家长对孩子的爱（视频可以循环播放，在背景音乐下进行分享）（3-4 位家长）

肯定家长对孩子的付出，鼓励家长为自己的付出而欣赏自己

老师的话：

大家为孩子做了些什么呢？平时我们都是怎么支持孩子的呢？孩子可以独立，很好地成长，我们做了很多很多，没有我们的默默耕耘，孩子不会茁壮成长。所以在我们的角色

对孩子非常关键！我们都为孩子很努力地做这个关键的角色，每位家长都是伟大的。这个时候，来我们都彼此跟旁边的家长们说一声：“辛苦了”。

#### 4. 总结：

每个家长都用爱耕耘麦子，默默为麦子付出很多

#### 老师的话：

我们有缘聚在这里，都是缘于一个很重要的原因，就是我们对孩子的爱。我们为了可爱的麦子，用爱耕耘，付出了很多。每位家长都是伟大的，感谢你们的付出，感谢你们的无私，大家的爱一直影响着孩子，让他们成为现在的样子。

## 四、主题活动：我家麦子

- 目标：**
1. 家长学会欣赏自己孩子的可爱之处
  2. 使家长认识到他们对孩子的成长至关重要，身教是最好的教育
  3. 肯定总结家长积极、良好的教育经验，提高家长教育孩子的自我效能感

**时间：**30 分钟

**材料：**第一次教案及 PPT  
视频：《长江七号》  
视频：《父母是孩子最好的老师》  
视频：《父母如何影响孩子》

**要点：**

1. 老师要着重引导家长分享自己孩子的优点及独特之处
2. 肯定家长对孩子的影响，身教是最好的教育

### 1. 观看视频《长江七号》片段，讨论片中主人公淘气和可爱的地方

老师利用教案中的“不同颜色的麦子”作为线索，带领家长分享自己孩子可爱之处

老师的话：

大家在家里都在辛苦地养麦子，为了我们可爱的麦子做了很多。在这里想跟大家分享一很特别家的麦子，大家有听过周星驰吗？有看过他的电影吗？知道他最新的电影是什么吗？嗯是叫《长江七号》，咱们看一看，在这个电影里面，周星驰他家的“麦子”又有什么可爱的特点好吗？

### 2. 带领家长分享自家孩子的可爱之处（选择 3-4 个人分享）

- 1) PPT 显示“不同颜色的麦子”
- 2) 随机选择 3-5 位家长，透过选择不同颜色的“麦子”来分享自己孩子的特点、可爱的地方以及优点

**注意：**老师鼓励家长分享的内容为孩子积极的部分，如果家长提及孩子不好的地方，老师应该引导到孩子好的方面。

老师的话：

大家自家的孩子有没有像主人公那样调皮，可爱的地方呢？种过麦子的家长们都会知道，我们可能找到两个完全一样的麦穗吗？不能，是呀，有些麦粒会大一些，有些麦粒会多一些，有些是会长的高一些，也有些会长得壮一些。咱们孩子也是一样，可能会有不同性格特点，各有各的色彩，各有各的可爱之处，就如不同颜色的“麦子”。在屏幕上有不同颜色的麦子，如果选一种颜色来代表你的孩子，你觉得你的“孩子”是什么颜色的呢？为什么？

### 3. 分析视频《长江七号》中的父亲如何影响主人公成为可爱的孩子

**孩子的可爱之处：善良、独立、自信、孝顺**  
**父亲的特点：勤奋工作、为孩子着想、鼓励孩子读书、愿意陪伴孩子**

- 1) 老师播放视频《长江七号》，与家长一起观看。
- 2) 播放结束后，老师通过与家长互动（问答）形式，总结小主人公的优缺点，重点指出“虽然小主人公很淘气，时常让父母生气，但他也有很多很可爱的一面，比如他“很善良，独立，自信，孝顺”等。
- 3) 老师帮助家长认识到，主人公的优点与父亲的关怀、爱心和教育分不开。

老师的话：

大家觉得，这些特点跟他爸爸有关系吗？爸爸做了什么会影响主人公？爸爸很勤奋地工作，很为孩子着想，鼓励孩子读书等。爸爸的这些做法对孩子影响非常大。其实，每一个家长，对孩子的影响都至关重要！

- 4) 播放视频《父母是孩子最好的老师》及《父母如何影响孩子》，强化父母对孩子的影响

老师的话：

大家觉得视频有意思吗？大家看到什么呢？家长在孩子的成长中重要吗？孩子在我们身边，我们平时是怎么想和怎么做，孩子就会学习到怎么想和怎么做。所以我们在孩子的成长过程中十分关键，身教是最好的教育！

4. 让家长认识到自己对孩子的影响，以及分享自己对孩子的影响（选择 3-4 人分享）

老师的话：

大家刚才分享自己孩子的可爱之处，那大家做了什么让他们成为那么可爱的孩子呢？你是怎么影响他的？你看到身边的家长如何影响自己的孩子的呢？

5. 总结：

老师重点强调：

- 1) 尽管孩子有缺点，但是孩子都有让我们自豪的优点
- 2) 种瓜得瓜：孩子的成长与我们家长的关怀、爱心和教育分不开
- 3) 身教是最好的教育：父母怎样做，孩子会怎样做，

**父母耕耘有道，麦子各有千秋，身教是最好的教育**

## 五、总结及预告

**目标：**总结第一次家长学校的内容及预告下一次，奖励表现好的家长

**时间：**10 分钟

**材料：**第一次教案及 PPT  
小礼品

**要点：**

**老师在总结过程中鼓励家长回答今天学习的内容，并予以奖励**

### 1. 总结

老师的话：

今天各位家长感觉印象最深刻的是什么？学到了什么？

要点：

- 1) 家长用爱耕耘麦子，默默付出，每位家长都是伟大的
- 2) 父母耕耘有道，麦子各有千秋，家长对孩子的影响至关重要，身教是最好的教育

### 2. 预告

下一次家长学校的预告：面对孩子让人头疼的行为问题时，家长该如何做。

### 3. 奖励

奖励回答问题的家长

肥料

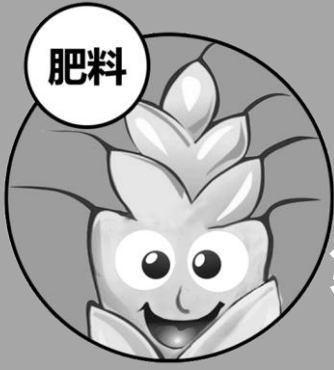

# 弹性的心灵 开心的微笑

## 第二次麦子需要施肥，孩子需要教育

### 活动目的：

1. 复习上一次的内容：麦子需要空气，孩子需要关爱
2. 了解孩子问题行为背后的心理需要
3. 针对孩子的外化问题行为，学习有效的赏罚分明方法

### 活动流程

|              |                                                         |       |
|--------------|---------------------------------------------------------|-------|
| 一、热身及复习      | 1. 热身活动<br>2. 开场白                                       | 10 分钟 |
| 二、主题活动：麦子的需要 | 1. 播放视频《小孩不笨》<br>2. 分析小孩出现问题行为的原因<br>3. 有效肥料包--学习有效教育方法 | 45 分钟 |
| 三、主题活动：给麦子施肥 | 游戏《击鼓传花》                                                | 25 分钟 |
| 四、总结及预告      | 老师总结                                                    | 10 分钟 |

### 活动材料

1. 第二次教案及 PPT
2. 笔记本电脑
3. 小型音箱
4. 投影仪
5. 视频《小孩不笨》
6. 音乐《击鼓传花》
7. 小球
8. 麦子扑克牌
9. 礼物



## 一、热身及复习

目标：热身活动及复习上一次的内容

时间：10 分钟

材料：第二次教案

要点：

1. 活跃现场气氛
2. 让家长回忆上一次的内容

### 1. 热身游戏《天气预报》

《天气预报》游戏规则：

跟随老师的指令做动作

指令包括：

- 1) 小风：轻轻地摩擦双手
- 2) 大风：大力摩擦双手
- 3) 小雨：五指轻轻地拍
- 4) 大雨：拍掌
- 5) 狂风暴雨：跟旁边的家长互相按摩肩膀

活动过程同第一次课中的热身游戏《天气预报》

### 2. 复习上一次的内容

老师的话：

还记得上一次咱们说了什么？还记我们说养孩子就如种什么呀？种麦子。我们就如孩子背后的苹果树，默默为孩子做了很多，无怨无悔。因为我们对孩子的爱默默地付出，希望他们可以快乐健康地成长。正因为家长的付出，孩子茁壮成长，我们一开始好好秀了把自家的麦子，我家麦子我自豪对吧？上一次看了个周星驰的视频，是什么？长江七号的主人公又调皮，又可爱，他可爱之处是谁影响的？是他的爸爸。所以我们说，谁是孩子成长中的关键呀，就是我们，家长是孩子的关键，家长怎样做，孩子就会怎样做，所以说身教是最好的教育。

## 二、主题活动：麦子的需要

**目标：**分析孩子问题行为背后的原因，并学习对应不同的原因的赏罚方法

**时间：**45 分钟

**材料：**1. 第二次教案  
2. 视频《小孩不笨》

**要点：**

1. 清楚地解释孩子问题行为背后的原因
2. 形象地讲解针对孩子不同问题行为和不同原因下的教育方法

### 1. 老师引导家长分享孩子有时候让他们担心的问题。

老师的话：

还记得我们上一次好好的秀了一下自己孩子，各位家长的孩子麦子一个个都很可爱，但是有时候他们的一些表现会让我们头疼是不是？你的孩子有哪些令你头疼的行为呢？（请家长分享）有遇到过同样问题的家长管请举手？看来，孩子在成长过程中的各种表现都是正常的。这里也有位家长为孩子的表现头疼，咱们看看发生了什么。

### 2. 播放视频《小孩不笨》

观察视频主人公的问题行为，以及做这些行为背后的原因。

老师的话：

在这里跟大家介绍一个家庭，他的两个孩子同样跟咱们的孩子很可爱，但是又有哪些头痛的行为，咱们一起看看视频，看看这家的小孩究竟做了什么让我们没辙的事，并且又是因为什么而出现这些行为呢。

### 3. 分析小孩出现问题行为的原因

- 1) 以视频为例，帮助家长认识到“孩子出现问题行为是正常的，正如我们在种麦子的时候，有时候出现问题，比如长虫子和缺少养分”。
- 2) 老师逐一讲解孩子的各种问题行为，以及问题行为出现的原因与所缺乏的“养分”（需要）。

| 问题表现     | 缺乏的“养分”（需要）                      |
|----------|----------------------------------|
| 孩子：跟家长作对 | “我能行”、“我的努力和进步是被看到和肯定的”、“我是被关注的” |
| 孩子：打架    | “我能行”、“我是团体的一员”、“我是被爱的”          |
| 孩子：说谎    | “我是被关注的”、“我是被爱的”                 |

老师的话：

看起来让人头疼的问题行为，其实是因为孩子缺乏了一些“养分”（需要）。要让问题麦子恢复健康，咱们得先了解小孩究竟需要些什么。孩子问题行为的背后，不外乎这5种心理的需要（如下图）：

## 麦子需要图

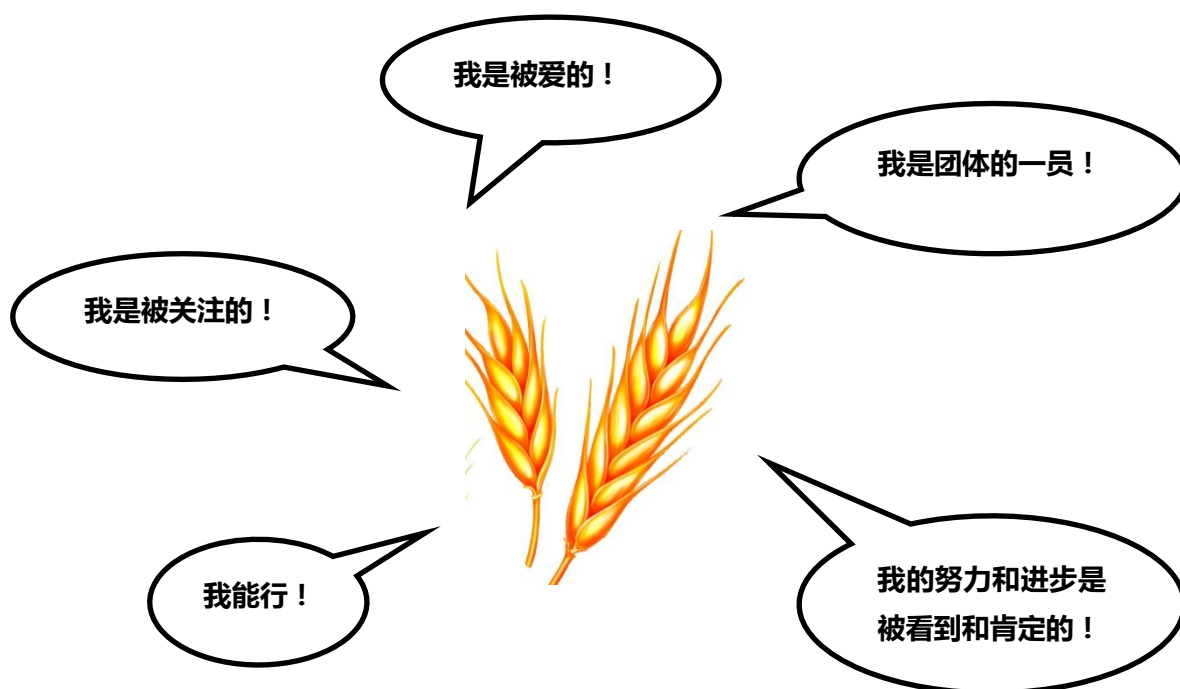

### 老师的话：

我们现在了解到咱们的麦子缺了什么了，当大家种庄稼的时候看到麦子缺养分会怎么做呢？我们会施肥。当孩子出现类似的问题时，是在告诉我们，他/她缺养分了，如果我们家长能用积极的方法满足他们的养分，那么这些问题自然就会解决了。大家觉得我们可以如何满足他们的这些需要呢？大家有没有用过一些有效的方法让孩子改变？

#### 4. 有效肥料包--学习有效赏罚方法

1) 老师带领家长通过回忆视频中家长的做法，总结出有效的教养方法。

老师呈现《小孩不笨》视频中无效及有效教养法比较图。

| 无效的方法                                                              | 有效的方法                                                                                                    |
|--------------------------------------------------------------------|----------------------------------------------------------------------------------------------------------|
| <ul style="list-style-type: none"><li>• 打孩子</li><li>• 责骂</li></ul> | <ul style="list-style-type: none"><li>• 称赞</li><li>• 鼓励</li><li>• 欣赏</li><li>• 爱</li><li>• 冷处理</li></ul> |

2) 老师讲解教养孩子的有效原则及其方法

原则：对问题——罚肥料包  
对需要——赏肥料包

罚肥料包  
冷处理

赏肥料包 1  
鼓励

赏肥料包 2  
欣赏

赏肥料包 3  
爱

说明：罚-肥料包：冷处理

允许问题出现，接纳孩子的表现，对问题—消极部分不做关注

老师的话：

大家都说了一些有效的方法，大家有没有发现有效的方法有些什么共同点呢？咱们再一起看视频《小孩不笨》，还记得里面的家长为了改变孩子做过什么？哪些有效的？哪些是无效的呢？

大家看到视频里面家长一开始是怎么面对孩子的问题的呀？我们看到，如果家长一直都只对他们的问题打骂有没有用呢？越关注孩子消极的表现，孩子的问题行为就越做越多，孩子跟我们的关系也越来越差。既然越关注他们的问题行为他们越出现这些问题，那我们应该怎么做呢？有效的做法是，我们不关注孩子消极的部分，对问题进行冷处理。所以，面对孩子问题行为第一个有效的方法就是：**冷处理，对问题行为—消极部分不给予关注。**

那我们就是什么都不做吗？不是，大家记得视频里之后家长做了什么之后，孩子的问题行为就消失了？是对孩子的赞赏和鼓励、欣赏，很重要的一个，是爱。所以，当麦子出现问题了，咱们要施肥，对孩子“施肥”的选择有：赞赏和鼓励、欣赏和爱。

### 3) 施肥特例：学习问题

第一步：分析：出现学习问题的原因

老师的话：

除了刚才我们提到哪些孩子的问题之外，孩子还有什么表现也让我们头痛的呢？小孩这个阶段最重要是什么呀？是学习。对大家家中的麦子学习如何？有遇到过学习不好的时候吗？大家是如何做的呢？咱们试试用刚刚谈过的施肥方法，看看如何面对这个问题？孩子遇到这种情况的时候他们心里会怎么想呢？会有什么感觉？

1. 我一直都学不好
2. 我永远都不会进步
3. 不管我成绩好不好，没有人会在意的

第二步：孩子缺了什么？

1. “我能行!”
2. “我的努力和进步是被看到和肯定的!”
3. “我是被关注的!”

老师的话:

我们接着看看他们这样想是因为背后缺了什么养分呢?对,我们要看他们缺了什么。那五个孩子的需要里面,大家认为是缺了哪几个呢?

**第三步:对症下药,使用肥料包**

罚-肥料包:

冷处理:不关注消极面

赏-肥料包

1. 鼓励和赞赏

“这次不行,不等于下次都不行,我相信你!”

“虽然结果不好,但我看到你一直在努力”

(家长根据自己的经验补充)

2. 爱

“无论你考的如何,我都在你的身边,都是爱你的”

老师的话:

清楚孩子心里缺了什么“养分”之后,我们可以对症下药,为孩子“施肥”了,首先我们对问题行为该用什么肥料包?是罚-肥料包,冷处理。然后我们对需要进行施肥,大家还记得有什么肥料包吗?这个时候可以用哪个呢?大家会怎么用,跟孩子说什么或者做什么?

**5. 总结**

**老师注意强调:**

- 1) 出现问题是很正常的,每个人(包括我们家长自己)的成长过程都会有
- 2) 出现问题时要看到孩子背后的需要是什么,用有效的方法
- 3) 孩子的行为改变不会一夜之间发生,需要家长持之以恒,不断使用有效方法,家长的坚持是孩子成长的一道围墙。

出现问题很正常,有效赏罚是正道

### 三、主题活动：给麦子施肥

**目标：**通过游戏复习孩子问题行为背后的需求、使用的赏罚方法

**时间：**25 分钟

**材料：**1. 第二次教案  
2. 麦子扑克  
3. 《击鼓传花》音乐  
4. 小球

**要点：**  
**在游戏中，鼓励家长分享自己有效教养的方法**

#### 游戏《击鼓传花》

透过《击鼓传花》游戏，为家长提供机会进行有效教养孩子方法的练习。

游戏玩法：

1. 播放音乐《击鼓传花》，音乐播放的过程中家长传递小球，老师随机按停音乐，音乐一停，小球停止传递，此时手握小球的家长要抽一张牌。
2. 家长从助手处抽取一张“麦子牌”，家长根据抽到的“麦子牌”选取适当的“心理需要”，并进行解释（麦子扑克牌由助手发给各个家长）
3. 老师问家长可以使用哪种“施肥包”对问题麦子进行“施肥”
4. 邀请家长去使用“施肥包”，两两一组，角色扮演

老师的话：

现在，咱们一起玩个游戏复习一下如何？玩之前要介绍我们项目组专门为大家设计的扑克牌，大家平时会打扑克吗？这里为大家设计了麦子扑克，里面包括今天学习过的内容哦，等会我们的游戏就会用到，大家准备好了吗？事不宜迟，游戏开始。

## 四、总结及预告

**目标：**总结第二次活动的内容及预告下一次的内容，奖励表现的家长

**时间：**10 分钟

**材料：**第二次教案  
小礼物

**要点：**

**总结过程中鼓励家长来回答今天学习的内容**

### 1. 总结

老师的话：

今天，你感觉印象最深刻的是什么？学到了什么？

大家都玩的如何呢？大家分享的方法很不错的。其实孩子出现问题行为本身不是问题，问题是他们背后缺了什么。我们理解原因，对症下药，使用有效的施肥包，孩子的问题就会改善，回到健康的道路上。

老师总结时强调：

- 1) 孩子出现问题是很正常的，每个人（包括我们家长自己）的成长过程都会有
- 2) 出现问题时要看到孩子背后的需要是什么，用有效的方法
- 3) 孩子的行为改变不会一夜之间发生，需要家长持之以恒，不断使用有效方法，家长的坚持是孩子成长的一道围墙。

麦子出现问题很正常，有效赏罚是正道

### 2. 预告

预告：如何了解孩子的内心世界，如何与自卑内向的孩子沟通，

### 3. 奖励

奖励回答问题的家长

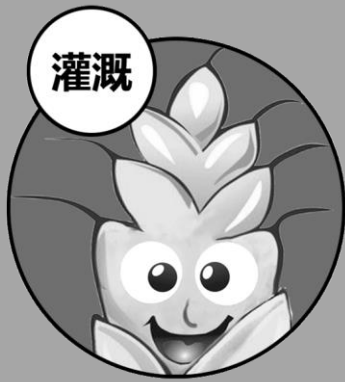

# 弹性的心灵 开心的微笑

## 第三次麦子需要灌溉，孩子需要沟通

### 活动目的：

1. 复习第二次的內容：问题麦子行为背后的需要、教养孩子有效的办法—有效赏罚
2. 了解不自信孩子的心理需求，说明称赞及表扬的重要
3. 学习及演练有效的沟通方法，灌溉不自信的麦子

### 活动流程

|               |                                                                        |       |
|---------------|------------------------------------------------------------------------|-------|
| 一、热身及复习       | 1. 手指操<br>2. 游戏：麦子扑克“眼明手快”                                             | 15 分钟 |
| 二、主题活动：不自信的麦子 | 1. 播放视频《不自信的 XX》<br>2. 分析不自信孩子的心理需要<br>3. 播放视频《小孩的告白》<br>4. 邀请家长分享成功经验 | 15 分钟 |
| 三、主题活动：跟孩子沟通  | 1. 播放视频《一直都想说》<br>2. 学习沟通秘籍<br>3. 内功：用心听<br>4. 外功：用心说<br>5. 沟通练习--高手过招 | 50 分钟 |
| 五、总结及预告       | 老师总结                                                                   | 10 分钟 |

### 活动材料

1. 第三次活动教案及 PPT
2. 笔记本电脑
3. 小型音箱
4. 投影仪
5. 视频《不自信的 XX》
6. 视频《小孩不笨--小孩的心理告白》
7. 视频《知心姐姐的故事》
8. 视频《一直都想说》
9. 视频《一直都想说-内功》
10. 视频《一直都想说-老师用心说》
11. 麦子扑克
12. 礼物



## 一、热身及复习

**目标：** 1. 透过热身游戏“手指操”营造轻松气氛  
2. 复习上一次的内容

**时间：** 15 分钟

**材料：** 第三次教案  
麦子扑克牌

### 要点：

1. 熟练游戏指令
2. 游戏时间可以灵活把握

### 1. 热身活动：手指操

跟着指令进行手指操，操作过程见视频《手指操》

指令：

做早操嘿

做早操嘿

我们一起

做早操嘿

### 老师的话：

大家这个星期过得如何，家里的麦子表现怎么样呢？感谢大家在辛苦的工作之余再次过来继续谈谈如何养好“麦子”。开始之前，咱们大伙活动关节，动作不大，用两只手指头做做有意思的运动好吗？别看我们手指灵活，要动动做个动作还蛮难的。有时候我们家里的麦子也会是这样，看起来很可爱很灵活，但是会出现一些行为让我们很头痛。但是这些行为背后都是因为孩子缺少了某些养分。

### 2. 复习孩子需要的五大“养分”

呈现《麦子养分图》复习孩子五大心理需求

1. 我能行！
2. 我的努力和进步是被看到和肯定的！
3. 我是团体的一员！
4. 我是被关注的！
5. 我是被爱的的！

### 3. 通过《麦子扑克》，邀请家长复习不同问题行为背后缺乏的需要

- 1) 老师邀请比较活跃的家长（每次 1 人，总选 2-3 人）抽取“问题卡”
- 2) 家长需要根据抽中的“问题卡”回答问题行为背后的想法、心理需求
- 3) 邀请家长选择适合的“肥料包”，及表演如何跟孩子使用“肥料包”

例子:

**1. 邀请家长抽取“问题卡”**

如抽中“问题学习麦子”

**2. 分析孩子出现问题的原因及想法**

- 1) 我一直都学不好
- 2) 我永远都不会进步
- 3) 不管我成绩好不好，没有人会在意的

**3. 问题行为背后缺乏的心理需要（养分）**

- 1) “我能行！”
- 2) “我的努力和进步是被看到和肯定的！”
- 3) “我是被关注的！”

**4. 选择适合的有效教养方法（肥料包）**

罚-肥料包：冷处理，不关注消极面

赏-肥料包

- 1) 鼓励、赞赏、欣赏  
“这次不行，不等于下次都不行，我相信你！”  
“虽然结果不好，但我看到你一直在努力”
- 2) 关注、爱  
“无论你考的如何，我都在你的身边，都是爱你的”

## 二、主题活动：不自信的麦子

**目标：**了解不自信孩子背后的原因，引出表扬和赞赏的重要性

**时间：**15 分钟

**材料：**1. 第三次教案  
2. 视频《不自信的 XX》  
3. 视频《小孩不笨-小孩的告白》

**要点：**

1. 帮助家长了解不自信小孩的心理需求
2. 突出表扬和鼓励的重要性
3. 让抚养者分享自己如何有效地鼓励小孩

### 1. 播放《不自信的 XX》

老师的话：

上一次我们分享到孩子的一些问题行为，这里有一个小小的视频，咱们看看主人公出现那种让我们担心的问题呢。

大家看到主人公为什么会到天台呢？嗯，很多朋友都不喜欢他，他觉得自己什么都不行。主人公有点内向，不自信。大家家里的“麦子”有这样的時候吗？是不是会让我们很担心呀？还有另一种孩子，什么都不说，有事都放在心里，做事不自信。大家的孩子有这样的時候吗？那个时候大家是怎么办的呢？

### 2. 分析孩子不自信的原因

1. 不自信的孩子缺乏：“我能行”、“被爱的感觉”、“被关注的感觉”
2. 孩子只看到自己消极的地方就如缺水的麦子一样，越来越弱小
3. 如果家长使用批评、责骂，孩子会更加不相信自己，缺乏被爱、支持的养分

老师的话：

内向的孩子，不自信的孩子缺了什么呢？他们认为自己什么都不行，缺了“我能行”他们不多说话，感到很孤独，没有什么人在他们身边理解他们，缺了“被关注”、“被爱”的感觉。这个时候的孩子就如没有水的麦子，缺水的麦子枯萎，长得很瘦弱，可能萎靡不振。大家这个时候有什么好的招数，救救这样的麦子吗？我们听听这样孩子的心声吧。

### 3. 播放《小孩不笨-小孩的心理告白》

老师的话：

大家看到视频之后觉得如何呢？这个时候我们会很着急，不希望我们的孩子一直这样的枯萎，可能我们会跟他们说很多很多，这个时候孩子是怎么反应呢？嗯，看来没有效果。还记得我们教养孩子的原则是什么呢：**无效的方法不做，有效的方法多做。**在视频里面，孩子自己说到他们希望家长给予什么呢？是表扬和鼓励。所以，如果我们要灌溉不自信的

麦子的时候，我们做什么最有效果？对，他们需要什么我们就给什么。给他们表扬和鼓励。大家有表扬和鼓励他们的好的经验吗？当时是怎么做的呢？结果如何呀？

#### 4. 家长分享自己有效鼓励孩子的方法（3-4人）

老师的话：

大家平时如何表扬自己的孩子的呢？有没有印象深刻的例子？当时是怎样的呢？效果如何？所以，为不自信麦子灌溉的有效招数是：**表扬和鼓励**。当孩子出现了积极的行为时，**家长要抓住机会表扬鼓励**，但家长也要注意，表扬的时候要注意要有针对性，比如“你今天帮我洗碗，真懂事！”“你今天帮妹妹讲题，真不错！”

## 三、主题活动：跟孩子沟通

**目标：**学习有效的沟通方法  
练习良好沟通方法

**时间：**50 分钟

**材料：**

1. 第三次教案
2. 视频《一直都想说》
3. 视频《知心姐姐的故事》
4. 视频《一直都想说-内功》
5. 视频《一直都想说-老师用心说》

**要点：**

1. 讲解沟通的原则
2. 配合视频材料学习良好沟通的内容
3. 演练沟通方法

### 1. 播放《一直都想说》

通过观看视频发现不同的沟通方法对不自信、内向的孩子有不同的效果

老师的话：

大家刚才分享了很多遇到不自信孩子的做法，而这次我们一起谈谈其中一个很重要的方法，就是沟通。当大家家里的麦子不自信了，没信心了，都会跟他们说什么呀？效果怎么样呢？这个视频里有一个小孩，遇到困难，对自己也没什么信心，咱们看看他身边的人都是怎么跟他回应的？

大家又遇到类似的经历吗？大家看到是谁的话有效果呢？是男老师，还是女老师的话？为什么两位老师都是想让孩子做的好，但是跟孩子说了这些却有不同的效果呢？看来，跟孩子有效的沟通看似简单，却又没那么容易。但不用担心，咱们今天就来练一练沟通得武林秘籍。

### 2. 学习有效沟通秘籍（沟通的步骤）

麦子沟通秘籍

沟通奇招一：处乱不慌—不着急，孩子出现有问题，这些表现都是正常的！

沟通奇招二：用心听和说（内功+外功）

老师的话：

想问一问大家，大家的孩子有过没有信心、不自信的时候吗？别说是小孩子，我们有时候也会对自己没信心的时候。所以这是很正常的。面对出问题的麦子的时候，我们不需要着急，每个人都会出现的。首先的奇招的就是：处乱不慌。不惊不忙之时，咱们就可以发功了，武林高手告诉我们，沟通的招式二是用心听和说。

### 3. 内功—用心听（沟通的原则）

#### 1) 带领家长进行“沟通小游戏”，体验平等和不平等沟通的过程

沟通小游戏玩法：

1. 两两一组（或选取两人上台游戏）
2. 一位扮演孩子，一位扮演家长
3. 扮演孩子蹲下，扮演父母的站起来，互相对视，读出对白
4. 扮演孩子的站起来，跟扮演父母的平视，再读出对白
5. 分享两次沟通过程的感受和不一样的地方

老师的话：

一般武功都分成两种，大家知道是哪两种吗？一种是内功，一种是外功。要练好外功，首先要练好内功。倾听孩子的心声，用心听就是内功，而用心说就是外功。

#### 2) 平等的沟通和不平等的沟通会有不同的感受

老师的话：

练功的时候到了，咱们两两一组进行练功！这个沟通小游戏要求两位朋友之中，一个演孩子，一个演家长，首先咱们要定下来谁做小孩谁做家长（此游戏也可以只邀请两位较活跃的家长上台体验）。好的，咱们过一把表演的瘾，为了更真实呢，咱们在高度上也要跟角色配合。大家家里的孩子还没有咱们那么高吧，所以表演孩子的家长请蹲下来，家长呢，高嘛，站起来就好。嗯，现在屏幕上出现大家的对白，大家扮演说说试一试。嗯，过程怎么样呀，现在我们让孩子站起来，家长和孩子平视。在这个姿态下咱们再试试说说对白，看看有什么不同的感觉？好，当完明星之后我要访问一下大家，大家觉得两次的沟通过程有什么不一样的地方吗？小孩说话的感觉有不一样吗？父母看到孩子的感受又有什么不一样吗？小孩子哪样的沟通会比较舒服呢？**所以我们发现孩子和家长平视的时候，孩子更能接受父母的话，感觉会更好，说话会更有效。两个人在同一个高度上，就是平等。**有一个武林高手也说了对平等的看法，咱们会一会这个高手，看看她有什么指点好吗？

#### 3) 播放《知心姐姐的故事》

老师的话：

大家记得视频里面的专家说了个什么的故事？嗯一位爸爸用平辈的口吻邀请孩子把妈妈照顾好，结果孩子真的很好地做到了。所以看来平等很重要，大家有类似的经历吗？当时你这样说孩子是什么反应呢？有什么效果？**所以用心听内功一就是平等。**

用心听的内功一：平等

老师的话：

光有一个内功，如何炼成武林高手？不够，咱们还需要一个内功加强加强。除了平等之外，还有什么原因让孩子会感到更好呢？咱们再看看刚刚看到的那个视频，在比较一下男老师和女老师的反应有什么不一样？

#### 4) 比较《一直都想说-内功》视频中男老师和女老师看到了主人公的哪些方面

老师的话：

我们看到男老师都说孩子的什么呢？都是说“你怎么弹得不好”“你在家没有练习吗”，这都是孩子不好的方面，都是消极的。女老师跟他说了什么？她看到孩子是很想把钢琴谈好，希望妈妈开心。这都是孩子好的部分，这些是积极的。所以看来，咱们对待没有信心的孩子，应该跟他一起关注消极还是积极的部分有效果呢？是积极的部分。我们看到男老师关注消极的时候，就会很着急，会骂主人公，这样对小孩的变化有效果吗？看来没有女老师的效果好。所以用心听的内功二就是——关注积极，只表扬。

### 用心听内功二：关注积极，只表扬

## 4. 外功—用心说（沟通的内容）

### （1）播放《一直都想说-老师用心说》

老师的话：

内功练好了，咱们就可以学习外功跟咱们的麦子过过招了。怎么说才能有效地为我们不自信的麦子好好灌溉？大家有些什么经验吗？大家有没有成功的经验，觉得不错的说法呢？咱们再看一看，视频里面的女老师是如何说让主人公有所改变的呢？（播放《一直都想说-老师用心说》）大家还记得老师说了什么内容呢？咱们一起分析一下老师这短短的几句话都说了什么

### （2）分析老师用心说的内容

用心说三招数：事件+情绪+积极建议和鼓励

老师：关于这次电子琴比赛，你很担心自己会弹得不好

（第一招：事件）

老师：所以你很紧张，你很不开心

（第二招：情绪）

老师：比赛结果真的不重要，比赛只是给自己一个展现的机会，（做好自己就好了，我相信你能做好的）。

（第三招：积极建议和鼓励）

老师的话：

第一句是说了电子琴比赛的事，是什么内容呢？是小孩当前发生的事，所以用心说的第一招是“事件”。

第二句是什么呢？她说了“你现在很紧张”，这是小孩的什么呢？是小孩的感觉，他的感受，这些都是他们的情绪。一般没信心的孩子都会有什么样的情绪呀？嗯，这些就在第二步回应给孩子，所以第二招就是“情绪”，回应孩子发生那件事之后的感觉。

第三句是说，比赛不重要只是给自己一个展现的机会，意思是不需要太紧张，做好自己，相信你是可以的。这是对小孩的什么话呢？对赞赏和鼓励的话，就是灌溉不自信麦子很重要的招数是吧？所以这个时候我们可以给予小孩一些积极的建议和鼓励。所以，用心说的第三招就是“积极建议和鼓励”。

大家学会沟通的外功招数了吗？外功用心说的三大招式就是

**事件+情绪+积极建议和鼓励**

练外功的时候不要忘记了我们的基本哦，就是用心听内功，其中2大内功就是

**用心听：内功一：平等**

**内功二：关注积极的方面，不批评**

## 5. 角色扮演《高手过招》：不同场景下邀请家长上来角色扮演，并给予鼓励

提供不同的场景，角色扮演说明用心说 3 招数，老师和助手可以先演练，然后再让家长上去角色扮演。

场景选择：

场景一：这次考试没有考好，回到家里闷在心理，什么都不说

场景二：在学校跟朋友的关系不好，被人欺负，甚至发生了冲突

场景三：被老师批评了

老师的话：

咱们都练了武林秘籍，有句话“光说不练”是不行的，咱们一起尝试以下学习成果如何？这里有几个不自信麦子的场景，都需要我们好好地为他们灌溉一下，谁愿意跟我们一起过招，秀秀今天的学习成果？（让家长选择场景，老师或者家长扮演场景下的孩子，另一个家长使用用心听和说跟孩子沟通）大家觉得哪一位家长说的话让你们影响深刻的呢？大家都有信心会家对我们的家的麦子使用者高招武功吗？



## 四、总结及预告

**目标：**总结第三次活动内容

**时间：**10 分钟

**材料：**第三次教案  
礼品

**要点：**

1. 总结中鼓励家长来回答今天学习的内容
2. 鼓励家长在家中今天学习的沟通方法

以下要点都可以通过提问回答的形式来进行，对回答的家长奖励。

1. 不自信的孩子就如枯竭的麦子一样，需要我们的灌溉，而他们缺乏的养分是

“我能行”、“被关注的感觉”、“被爱的感觉”

2. 为“不自信麦子”灌溉的有效招数是：称赞和表扬

3. 麦子沟通秘籍：

奇招一：处惊不慌

奇招二：用心听和说

内功—用心听：平等、关注积极，不批评

外功—用心说：事件+情绪+积极建议和鼓励

4. 老师鼓励家长回家尝试使用“麦子沟通秘籍”，下次分享使用的经验，分享经验的家长会获得礼物

5. 预告：

下一次的内容是：如何做孩子生命中的贵人

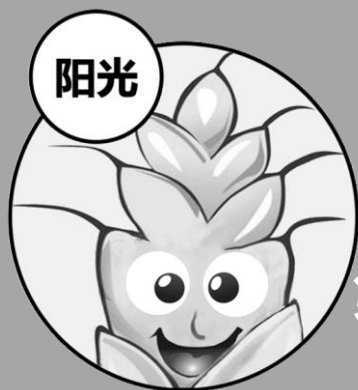

# 弹性的心灵 开心的微笑

## 第四次麦子需要阳光，孩子需要欣赏

### 活动目的：

1. 复习第三次的內容：有效沟通—用心听和用心说（内功+外功）
2. 学习使用沟通方法跟孩子表达欣赏和鼓励
3. 表达对孩子未来的积极的期望

### 活动流程

|                  |                                                                              |       |
|------------------|------------------------------------------------------------------------------|-------|
| 一、热身与复习          | 1. 热身活动<br>2. 复习沟通秘籍内功、外功                                                    | 10 分钟 |
| 二、主题活动：做孩子生命中的贵人 | 1. 播放视频《只有你能欣赏我》<br>2. 分享观感<br>3. 学习表达欣赏和肯定                                  | 35 分钟 |
| 三、主题活动：独特的麦子     | 1. 引入故事《龙生九子，各显神通》<br>2. 播放视频《一块地总有一粒种子适合它》<br>3. 小组讨论《我孩子的未来》<br>4. 小组内角色扮演 | 35 分钟 |
| 四、总结及回顾          | 老师总结                                                                         | 10 分钟 |

### 活动材料

1. 第四次活动教案及 PPT
2. 笔记本电脑
3. 小型音箱
4. 投影仪
5. 视频《只有你能欣赏我》
6. 视频《一块地总有一粒种子适合它》
7. 礼物

## 活动方案

# 一、热身及复习

目标：透过热身游戏“手指操”凝造轻松气氛，复习上一次的内容：沟通秘籍

时间：10 分钟

材料：第四次教案

要点：

复习沟通的原则和步骤

## 1. 热身活动《手指操》

手指操

跟着指令进行手指操，操作过程见视频《手指操》

指令：

做早操嘿

做早操嘿

我们一起

做早操嘿

老师的话：

这一次手指操有没有做的更顺一下呀？还记得我们上一次说麦子有时候会干枯，捏了，是说孩子的什么表现呢？孩子有时候会不自信，做事没有信心。这个时候我们要为麦子好好地灌溉，要灌溉不自信的孩子我们学了个武林秘籍，是什么呢？沟通秘籍。

## 2. 复习沟通

麦子沟通秘籍

沟通奇招一：处惊不慌，麦子这些表现都是正常的

沟通奇招二：用心听和说（内功+外功）

内功—用心听：平等、关注积极，不批评

外功—用心说：事件+情绪+积极建议和鼓励

老师的话：

咱们的沟通秘籍有两奇招，还记得是哪两个吗？第一招是处惊不慌，因为孩子这些表现都是正常的。我们冷静下来之后就要出招了，用心听和说。还记得哪个是内功吗？用心听。用心听包含了两个内功招式，就是“平等”和“关注积极不批评”。大家记得我们玩的蹲下和站起来沟通的游戏吧？练好内功咱们出招了，就是用心说，用心说应该有什么内容呢？事件+情绪+积极建议和鼓励

我们上一次在不同的场景下用我们学到的沟通秘籍进行练习了，大家回家有没有对家里麦子使用沟通秘籍？大家有没有用沟通秘籍称赞孩子呀？

## 二、主题活动：做孩子生命中的贵人

**目标：** 1. 使家长认识到自己的正向期望、欣赏和肯定在孩子成长过程中的重要性  
2. 使用沟通秘籍练习赞赏和肯定孩子

**时间：** 35 分钟

**材料：** 1. 第四次教案  
2. 视频《只有你能欣赏我》  
3. 礼物

**要点：**

**使用学过的沟通秘籍练习欣赏和肯定孩子**

### 1. 播放视频《只有你能欣赏我》

#### 只有你能欣赏我

第一次参加家长会，幼儿园的老师说：“你的儿子有多动症，在板凳上连三分钟都座不了，你最好带他去医院看一看。”

回家的路上，儿子问她老师都说了些什么，她鼻子一酸，差点流下泪来。因为全班 30 位小朋友，惟有他表现最差；惟有对他，老师表现出不屑。然而她还是告诉她的儿子。

“老师表扬你了，说宝宝原来在板凳上坐不了一分钟，现在能坐三分钟了。其他的妈妈都非常羡慕妈妈，因为全班只有宝宝进步了。”那天晚上，她儿子破天荒吃了两碗米饭，并且没让她喂。

儿子上小学了。家长会上，老师说：“全班 50 名同学，这次数学考试，你儿子排第 40 名，我们怀疑他智力上有些障碍，您最好能带他去医院查一查。”

回去的路上，她流下了泪。然而，当她回到家里，却对坐在桌前的儿子说：“老师对你充满信心。他说了，你并不是个笨孩子，只要能细心些，会超过你的同桌，这次你的同桌排在第 21 名。”说这话时，她发现，儿子黯淡的眼神一下子充满了光，沮丧的脸也一下子舒展开来。她甚至发现，儿子温顺得让她吃惊，好象长大了许多。第二天上学时，去得比平时都要早。

孩子上了初中，又一次家长会。她坐在儿子的座位上，等着老师点她儿子的名字，因为每次家长会，她儿子的名字在差生的行列中总是被点到。然而，这次却出乎她的预料，直到结束，都没听到。她有些不习惯。临别，去问老师，老师告诉她：“按你儿子现在的成绩，考重点高中有点危险。”

她怀着惊喜的心情走出校门，此时她发现儿子在等她。路上她扶着儿子的肩膀，心里有一种说不出的甜蜜，她告诉儿子：“班主任对你非常满意，他说了，只要你努力，很有希望考上重点高中。”

高中毕业了。第一批大学录取通知书下达时，学校打电话让她儿子到学校去一趟。她有一种预感，儿子被清华录取了，因为在报考时，她给儿子说过，她相信他能考取这所大学。儿子从学校回来，把一封印有清华大学招生办公室的特快专递交到她的手里，突然转身跑到自己的房间里大哭起来。边哭边说：“妈妈，我知道我不是个聪明的孩子，可是，这个世界上只有你能欣赏我……”这时，她悲喜交加，再也按捺不住十几年来凝聚在心中的泪水，任它打在手中的信封上。

老师的话：

大家还记得孩子的 5 大需要吗？对于不自信的孩子，他们觉得自己什么都做不好，什么都不行，他们缺了什么呢？是“我能行！”“我的进步和努力是被看到和肯定的！”“我是被关注的！”，那对应这些需要我们需要施肥包，还记得有什么施肥包吗？“赞赏和肯定”“欣赏”。我们现在看一个小故事，主人公的表现同样地不太有信心，我们看看她的妈妈做了什么，到最后获得了意想不到的结果？

## 2. 请家长分享看过会后的感受，老师给予鼓励（5分钟）

### 老师的话:

大家看完以后有什么感受呢？小孩在可以从不被老师看好，到最后考上清华。在这个过程中，他的母亲是他生命中的贵人。他的母亲做了什么？称赞和肯定，一直能看到孩子积极的一面，几十年如一日的鼓励，最终成就了孩子的人生。那么，母亲是怎么跟他表达欣赏肯定的呢？

咱们使用我们上一次学习过的沟通外功试一试？

外功-用心说：  
事件→情绪→积极建议

## 3. 老师邀请家长使用沟通秘籍对孩子表达欣赏和肯定。（20分钟）

- 1) PPT 上出现《麦子优点库》
- 2) 随机邀请家长在《麦子优点库》上选出自己孩子拥有的优点
- 3) 带领家长使用外功“用心说”来模拟对孩子表达对他的欣赏和肯定
- 4) 总结：

让孩子积极发展，家长的欣赏和肯定是关键

### 我自豪麦子优点库

|    |     |      |     |      |      |     |      |      |
|----|-----|------|-----|------|------|-----|------|------|
| 聪明 | 认真  | 努力   | 孝顺  | 勇敢   | 有天赋  | 有爱心 | 善良   | 热心助人 |
| 刻苦 | 坚强  | 尊敬师长 | 有志气 | 诚实   | 自信   | 谨慎  | 知恩图报 |      |
| 勤奋 | 独立  | 踏实   | 刻苦  | 善解人意 | 成熟   | 乐观  | 大方   |      |
| 正直 | 有耐心 | 有才华  | 冷静  | 有恒心  | 勤俭朴素 | 灵活  | 开朗   |      |

### 老师的话:

有谁愿意再次做做明星？谁愿意跟我合作呢？表演是有奖品的哦。

家长对孩子的评价，对孩子有绝对性的影响；孩子往往就是依照父母的期望发展的，你常常赞美孩子、孩子就会认为自己是善良的、优秀的；相反如果您常常否定孩子、压抑孩子，孩子也会对自己不认同，认为自己是没用的，所以明确地告诉孩子您对他的期望，让孩子明白您对孩子的正向希望，孩子就会朝着健康良好的方向发展，因为一个整天被父母骂笨的小孩，长大后绝不可能变成一个天才，您说是吗？就像麦子的成长需要阳光，孩子也需要鼓励、肯定、欣赏。所以，**希望您也能做孩子生命中的贵人，照亮孩子的前程。**

### 三、主题活动：独特的麦子

**目标：**

1. 认识到每个孩子都有他的独特价值，天生我才必有用
2. 表达自己对孩子未来的期待

**时间：**35 分钟

**材料：**

1. 第四次教案
2. 视频《一块地总有一粒种子适合它》

**要点：**

**认识孩子的独特性，并对其独特性表达合理的期望**

1. 引入故事《各显神通的龙九子》

老师的话：

每个家长都有一颗望子成龙的心，但是龙生九子，各不相同，比如它的大儿子**赑屃**(bìxì)，长的龙脸龟身，力气大，所以它是人间的驮碑工，而龙的九儿子叫**椒图**(shūtu)，专门喜欢当保安，所以就成了民间大门上的龙头“门环”。所以每个孩子擅长的地方也不一样。请各位家长欣赏这个故事，《一块总有一粒种子适合它》

2. 播放视频《一块地总有一粒种子适合它》

**故事《一块地总有一粒种子适合它》**

有一个女孩，没考上大学，被安排在本村的小学教书，由于讲不清数学题，不到一周被学生轰下台。母亲为她擦了擦眼泪，安慰说，满肚子的东西，有人倒得出来，有人倒不出来，没必要为这个伤心，也许有更适合你的事情等着你去做。

后来，她又随本村的伙伴一起外出打工，不幸的是，她又被老板轰了回来，原因是剪裁衣服的时候，手脚太慢了，品质也过不了关。母亲对女儿说，手脚总是有快有慢，别人已经干了很多年了，而你一直在念书，怎么快得了呢？

女儿先后当过纺织工，干过市场管理员，做过会计，但无一例外，都半途而废，然而每次女儿沮丧回来时，母亲总安慰她，从没有抱怨。

三十岁时，女儿凭着一点语言天赋，做了聋哑学校的老师，后来她又开办了一家残障学校，再后来，她在许多城市开办了残障人用品连锁店，她已经是一个拥有几千万资产的老板了。

有一天，功成名就的女儿凑到已经年迈的母亲面前，她想得到一个一直以来想知道的答案，那就是前些年她连连失败，自己都觉得前途渺茫的时候，是什么原因让母亲对她那么有信心呢？

母亲的回答朴素而简单，她说，一块地，不适合种麦子，可以试试种豆子，豆子也长不好的话，可以种瓜果，瓜果也不济的话，撒上一些荞麦种子一定能开花，因为一块地，总有一粒种子适合它，也终会有属于它的一片收成。

听完母亲的话，女儿落泪了，她明白了，实际上，母亲恒久而不绝的信念和爱，就是一粒坚韧的种子，她的奇迹，就是这粒种子执著而生长出的奇迹。

老师的话:

大家看到之后有什么想法吗？看起来主人公一开始什么都做不了，其实是这样的吗？其实每个人都会找到属于他的一片天地，总有一个地方可以好好地发挥自己的价值。对我们家里的麦子也是如此，总有一个地方或者职业是适合它的。大家觉得自己的孩子以后会做什么呢？

### 3. 小组讨论《我孩子的未来》

请家长分享（3-5位家长），自己的孩子在哪方面有好的优势，以及对孩子未来的期望。再次出现《麦子优点库》

| 麦子优点库 |     |      |     |      |      |     |      |      |  |
|-------|-----|------|-----|------|------|-----|------|------|--|
| 聪明    | 认真  | 努力   | 孝顺  | 勇敢   | 有天赋  | 有爱心 | 善良   | 热心助人 |  |
| 刻苦    | 坚强  | 尊敬师长 | 有志气 | 诚实   | 自信   | 谨慎  | 知恩图报 |      |  |
| 勤奋    | 独立  | 踏实   | 刻苦  | 善解人意 | 成熟   | 乐观  | 大方   |      |  |
| 正直    | 有耐心 | 有才华  | 冷静  | 有恒心  | 勤俭朴素 | 灵活  | 开朗   |      |  |

句式可以是：

我认为我的孩子的未来……，因为他/她……（讲孩子的优点）。

### 4. 角色扮演，请家长练习以沟通秘籍讲出自己的期望。（3-5位家长）

外功—用心说：事件+情绪+积极建议和鼓励

例子：

孩子，你当时很卖力气地帮助朋友，你很善良，我很为你感到高兴！我相信你以后会有很多朋友！

你这次考试考得不错，你很聪明！我很为你自豪！我相信你的聪明一定会在学习上有所成就！

老师的话:

告诉孩子自己的期望一定时发自内心的、真诚的，孩子很聪明，能够明白家长是不是真心。真正的看到孩子的潜力和优势，鼓励孩子朝这个目标努力。所以：**每个孩子都是独特的，天生我材必有用，总有一个地方适合他！**

## 四、总结及预告

### 目标:

1. 总结这次学习的内容
2. 让孩子积极发展，家长的欣赏和肯定是关键
3. 每个孩子都是独特的，天生我才必有用，总有一个地方适合他！
4. 理解孩子在学习上的表现

时间： 5 分钟

材料： 第四次教案  
小礼物

### 要点：

**合理解孩子在学習上的表现，强调家长欣赏和肯定的重要**

### 1. 总结今天的内容

今天的课程给您印象最深刻的是什么？您学到了什么？

做孩子生命中的贵人，家长的欣赏和肯定是孩子成才的关键  
每个孩子都是独特的，天生我才必有用，总有一个地方适合他！

### 2. 对孩子学习的期待

理解成绩好不等于成才

老师的话:

最后，想跟大家谈谈这个欣赏和肯定的核心是什么，其实就是对孩子的期望。有一些家长提到，希望孩子学习成绩好，我想问各位家长，您觉得孩子一辈子是做人做事重要，还是每次都考一百分考第一重要？前者还是后者？大家都说前者做人重要。你看我们的家长不明智？听起来很明智。可是，请问大部分的家长在做前面的工作，还是在做后面的工作？后面！「你这次考几分了？给我拿过来！」脑子里都是分数。还问各位家长一个问题，**大学毕业有没有文化？（有）不孝顺父母有没有文化？（没有）那么大学毕业不孝顺父母有没有文化？**大家答不出来，被我骗到了。

老祖宗已经告诉我们了，什么是教育？教就是“上所施，下所效”，意思就是你家长怎么做，孩子就会怎么做。育是“养子使做善也”，意思就是培养孩子，让他做好人。当孩子有个善良的心，他就有善良的行为，他自然而然就会有很多善良的朋友，他的人生会幸福。

好了，有的家长说，那我不用管孩子的学习了，只要让他做个好人就行了。学习重要不重要？还是重要的，因为那是他以后生活的根本，不一定非考一百分，读大学，读博士，但是要学到一技之长，能够自己照顾自己，这样孩子长大了，家长不用牵挂。所以，学习好不一定人生幸福。

我们今天讲的内容就是，像麦子需要阳光一样，孩子需要鼓励，家长的鼓励和肯定是孩子进步的最大动力，只要家长有善于发现的心，能够耐心的不断鼓励孩子，您的孩子也会像今天两个故事的主人公一样，长大成才。期望您能实践今天所学，做孩子生命中的贵人。

### 3. 预告：自我照顾，做健康快乐的麦子家长



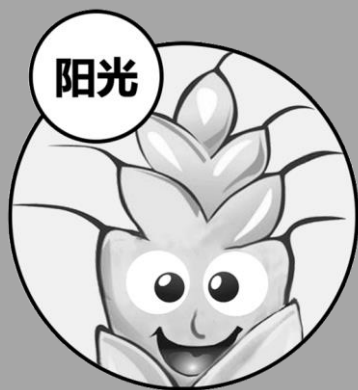

# 弹性的心灵 开心的微笑

## 第五节做健康快乐的麦子家长

### 活动目的：

1. 复习第四次内容：欣赏孩子，每一个孩子都是独特的
2. 鼓励家长的付出
3. 学习自我照顾的两种方法：社会支持与自我调节

### 活动流程

|           |                                                                |       |
|-----------|----------------------------------------------------------------|-------|
| 一、热身及复习   | 1. 复习及引言<br>2. 热身活动《盲人走路》                                      | 15 分钟 |
| 二、你帮我，我帮你 | 1. 活动《麦子家长的烦恼》<br>2. 活动《你帮我，我帮你》                               | 20 分钟 |
| 三、笑一笑，烦恼跑 | 1. 讲解照顾身体<br>2. 活动人物访谈《如何保持好心情》<br>3. 讲解笑的功用<br>4. 播放视频《婴儿笑》   | 30 分钟 |
| 四、回顾与结束   | 1. 大组讨论收获，赠送照片<br>2. 老师问答式总结五次核心内容<br>3. 感谢和临别赠言<br>4. 填写家长反馈表 | 25 分钟 |

### 活动材料

1. 第五次教案及 PPT
2. 笔记本电脑
3. 小型音箱
4. 投影仪
5. 视频《婴儿笑》
6. 麦子扑克
7. 视频《路要自己走》
8. 小礼物
9. 《盲人走路》用的头巾

# 一、热身及复习

**目标：**透过热身活动“盲人走路”凝造轻松气氛，复习上一次的内容：鼓励孩子

**时间：**15 分钟

**材料：**第四次教案

### 要点：

1. 复习上一次内容：做孩子生命中的贵人，每个孩子都是独特的
2. 活跃气氛，引出家长的社会支持主题

## 1. 复习上次内容及引言

- 1) 欣赏对于一个孩子至关重要
- 2) 每一快地都有一粒种子适合它

如果，有一些是新来的家长，老师可以适当多讲一些上次的内容，或者请来过的家长讲讲上一次课的收获。

### 老师的话：

我们知道就像麦子需要阳光一样，孩子也需要肯定鼓励，尤其是对于没有自信心的孩子。一句话就可以改变孩子的一生，同时，每个孩子都是独特的，总有自己的优点。当一个人成为家长时，莫名其妙的“优越感”随即产生，他们会赋予自己新的职责，并戴上“父母”这个面具。渐渐地，而他们忘了家长也是人，只要是人就会犯错，就会有七情六欲，遇到各种困难。作为家长好好照顾自己，给孩子做出榜样，做个健康快乐的麦子家长，是本次课要讨论的主题。

## 2. 热身活动《盲人走路》（只供参考）

设计盲行路线可以就地取材（如砖头、凳子），设置障碍和难度（如上坡、转弯等）。家长按照随机抽取的扑克牌确定“盲人”，盲人被蒙住眼睛，在原地转3圈，失去方向感。其余的家长继续抽签，抽到与盲人牌面相同的家长扮演该盲人的“向导”。然后盲人在向导的搀扶下，沿着指定路线行走。要求：活动中向导不能暴露自己的身份，不能讲话，大家都要保持安静，向导只能用非语言的方式引导盲人走完全程，让盲人自己体验各种感觉。完成之后，两人交换，沿选定路线再走一遍。结束后，请家长分享自己作为盲人和向导的感受。两人过桥完成以后，让全体家长集合，一人做向导，不必蒙眼；其他人做盲人，但活动过程中可以说话。老师变换一下盲行路线，由向导带领全体盲人过桥。在难度较大的位置，老师应起保护作用，防止家长受伤。在活动后分享体验的部分，引导大家讨论自己作为盲人和向导两个角色的体验。

### 老师的话：

生活中，我们难免会有遇到各种困难，变得像游戏中的盲人一样，找不到方向，这时候，如果我们能去寻找帮助我们的人，就可以顺利度过难关，还可以收获一段友谊。

## 二、主题活动：你帮我，我帮你

**目标：**让家长识别身边的支持资源，以及自己支持别人的能力

**时间：**30 分钟

**材料：**第五次教案

**要点：**

1. 自己遇到困难可以寻求帮助，我们周围有很多的资源
2. 别人遇到难处，我们施与援手，是给自己积福

### 1. 活动《麦子家长的烦恼》。

老师发给每个成员一张卡片，以不记名的方式，每个成员写下自己的一个烦恼或正面临的问题，可以是跟孩子无关的。然后，老师用一个容器收集问题，每个人随意抽取，读出这个问题。每个问题都读完之后，老师总结，大家遇到的问题很多都是相似的。把这些问题写在黑板上，归类成几个大类（如情绪问题、生活压力、健康问题）。请大家出谋划策，如何解决这些烦恼或问题。请家长自愿发言。

老师的话：

看来我们的烦恼或者问题都有相似之处，原来身边的家长也和我一样，面临了同样的问题。现在我们给这些问题一起出谋划策，看看如何解决。（进行活动后，老师点题）看来一个好汉三个帮，人难免会遇到难处，如果这个时候可以主动的寻找别人的帮助，说不定问题就会迎刃而解。

### 2. 活动《你帮我，我帮你》

#### 1)邀请家长分享难忘的互相帮助的事情

老师请大家讲述一件难忘的别人帮助自己和自己帮助别人的事情，参照下面问题，两人一组分享体验。

什么时候？当时情况是什么样的？  
谁来帮助你？当时你的感受是什么？

#### 2) 老师请大家一起列出别人帮你的各种方法，写在黑板上，总结出社会支持类型

物质支持：借钱、支援衣服、农具、药品，帮忙干活  
情感支持：心情不好时，谈心、安慰  
信息支持：遇到难以决定的事情、帮忙出主意，提供解决办法  
陪伴支持：一起干活、赶集、进程。

3) 请家长在房间里找出曾给自己帮助的人，无论以上任意一种类型，走上去，对他说“上次你……，谢谢你！”

### 3. 老师总结：施比受有福

一个盲人在夜里走路时，总是手里提着个灯笼，别人看了很好奇，就问他：“你自己什么也看不见，为什么还要提灯笼走路呢？”那个盲人满心欢心地说：“这个道理很简单，我提灯笼并不是给自己照路，而是为别人照路，帮助别人。我提上灯笼，别人也容易看见我，不会撞到我身上，也可以保护自己的安全，等于也帮助了自己。”

## 三、主题活动：笑一笑，烦恼跑

**目标：**激发家长自我照顾的愿望，增强做家长的自我效能感

**时间：**20 分钟

**材料：**

1. 第五次教案
2. 视频《婴儿笑》
3. 自我照顾扑克牌

**要点：**

1. **自我照顾的两个方面：照顾身体，照顾心情**
2. **关注生活中积极阳光的一面，做个健康快乐的家长**

### 1. 引言

老师引导大家讨论，如何照顾自己，照顾自己包括哪些方面。讨论之后老师总结，自我照顾包括照顾身体和照顾心情。

### 2. 照顾身体

- 1) 老师邀请家长发言，谈谈平时是怎样照顾自己的身体的。
- 2) 老师呈现给大家扑克牌一张，养生口诀《六多六少》，用下面材料言简意赅的解释

养生六多六少  
少肉多豆  
少盐多醋  
少衣多浴  
少食多嚼  
少药多练  
少车多步

一、少肉多豆。这似乎已成了众人皆知的“秘密”。我们身边有不少“肉食动物”，炸鸡、烤肉、烤鸭、红烧肉，顿顿无肉不欢。按“膳食平衡宝塔”的建议，一个人每天最好只摄入瘦肉 75 克，即一副扑克牌大小的一块。其中，体力劳动者、男性可以多吃红肉，脑力劳动者、女性及身体机能退化的老人，应多吃白肉。尤其是患有肥胖、心脏病、高血压等的人，更应少吃肉，多吃豆制品。豆子被称为“地里长出来的肉”，特别是用大豆做的各种豆制品，比如水豆腐、豆腐丝、豆腐干、豆腐皮之类，都是提供蛋白质的好食品。

二、少盐多醋。盐不仅会偷走你身体里的钙，还会带走正常的血压。自家做饭时，除了少放盐，也要尽量控制酱油、番茄酱、辣椒酱、咖喱等调味品的摄入量。更要小心看不见的盐，比如餐馆中红烧菜、炖菜等菜品，薯片、罐头及快餐方便食品中都含较多的盐。醋则称得上是厨房里的保健调味品了，炒菜时不妨放一点，用米醋腌泡菜可以降低血脂，用陈醋配着面食吃能助消化，做鱼和骨头汤的时候放点醋，还有助于其中钙质的吸收。

三、少衣多浴。一提到少穿，自会让人想到“春捂秋冻”。其实，秋冻不是让人挨冻，而是指缓缓添衣。适当的凉爽刺激，有助于促进身体代谢，提高对低温的适应力。当户外早晚气温降低到 10℃左右时，就应该结束“秋冻”了。洗个热水澡既能解乏，又助睡眠，最重要的是在洗澡时做点“小动作”，

比如用手掌在腹部按顺时针方向按摩，并淋浴腹部，可以防便秘，在水流中搓脸能加速血液流动，能缓解疲劳。早晨起来最适合淋浴，可以唤醒身心，而睡前 1 至 2 个小时，最好在浴盆里泡个澡。水温应在 40—50 摄氏度，比体温略高。

四、少食多嚼。想管住自己的嘴，不妨尝试以下几招：在感到有点儿饿时开始吃饭，而且每餐在固定时间吃；每次少盛一点，或使用浅盘和透明餐具；吃饭至少保证 20 分钟，因为从吃饭开始，经过 20 分钟后，大脑才会接收到吃饱的信号。一般来说，每口食物咀嚼 15—20 次，有助消化，避免发胖，还能缓解紧张、焦虑的情绪。不妨用小汤匙代替筷子，或者轮流使用勺子和筷子吃饭，即使想快也快不起来，保证每口食物都能充分咀嚼。

五、少药多练。不管平时多大方，吃药时最该“抠门点”，遇到伤风感冒这样的小病，最好扛一扛，别随便吃药。老年人还应遵守“岁加量减”的原则，60 岁以上的老年人，其用药量相当于成人用药量的 3/4，不可自行增加，并且同时最多只能服 4 种药。如果没有养成锻炼的习惯，吃药也等于白吃。最新研究显示，只要每天坚持锻炼 15 分钟，平均可延寿 3 年，比如快走、慢跑、骑自行车等，都称得上最好的“药物”。

六、少车多步。一项研究显示，有车一族越来越多，大约 25% 的人已经丢掉了走路的好习惯。研究发现，整天开车到处走的人比喜欢走路的人，生病的时间长 2 倍。现代人以工作忙为借口逃避运动，其实，每天进行 30 分钟的有氧运动（如快走），免疫系统的工作效率更高。

### 3. 人物采访《如何保持快乐》——照顾心情

- 1) 请大家推选一个最乐观、最爱笑的人，请他/她谈谈自己的经历。大家可以就感兴趣的问题提问，比如性格中乐观的方面，遇到问题他如何解决，心情不好时有何妙方。
- 2) 邀请家长谈谈自己遇到心情不好的时候都会做些什么？
- 3) 根据大家所谈到的方法，归纳总结照顾心情的几种方法，

你帮我，我帮你：找朋友谈心、找信任的人寻求支持  
 动一动，心情好：深呼吸、去劳动、活动一下筋骨，想想“降龙十八掌”的招式  
 笑一笑，烦恼抛：唱歌、跳舞、听音乐、想想“沧海一声笑”

#### 老师的话：

通过我们的访谈，我们发现这位家长经常关注生活中的积极的一面，所以才能保持笑口常开。我想每个人都有一些保持心情的好办法。请大家分享分享。

### 4. 笑一笑，烦恼跑

#### 1) 笑的功能，把扑克牌卡片发给大家，老师讲解。

#### 老师的话：

我们自古就有这样的话：笑一笑，十年少，笑一笑，烦恼抛。其实是告诉大家，即使生活遇到再大的困难，只要还能自己找乐子，那么生活就还有滋有味。这笑里面的学问可大了。各位家长请看手中的扑克牌，里面有 12 张，我们分别来看看笑都有哪些功能。

扑克牌

|        |       |
|--------|-------|
| 一笑烦恼跑  | 二笑怒气消 |
| 三笑憾事了  | 四笑病魔逃 |
| 五笑朋友多  | 六笑学问高 |
| 七笑模样俏  | 八笑身体好 |
| 九笑人不老  | 十笑乐逍遥 |
| 天天开口笑， | 寿比彭祖高 |

讲解资料

|                                                                                                                                                                                      |                                                                                                                |
|--------------------------------------------------------------------------------------------------------------------------------------------------------------------------------------|----------------------------------------------------------------------------------------------------------------|
| <p>笑一笑，十年少<br/>笑能赶走压力，一个人大笑的时候，脑中的快乐激素会释放，可以止痛、可以赶走负面情绪，释放压力。</p>                                                                                                                    | <p>笑可以放松身体<br/>大笑 1 分钟，全身可放松 47 分钟。<br/>笑是一种没有副作用的镇静剂，笑能刺激大脑产生内啡肽，具有镇痛和欣快作用，是天然的镇静剂和麻醉剂。</p>                   |
| <p>笑帮你克服困难<br/>如果你还能笑证明你还有希望，笑使人心情开朗，精神振奋，头脑清醒，让人更有勇气克服困难。</p>                                                                                                                       | <p>笑能治病<br/>一日三笑，人生难老。一日三恼，不老也老。小丑治病是美国一所大学进行的研究，当小丑来到身患癌症和糖尿病的住院儿童身边后，孩子们的病情有更好的发展。</p>                       |
| <p>笑能拉近距离<br/>笑是两个人之间最短的距离，微笑传递着一种众人皆知的信息：我是友好的，我愿意和你和睦相处。</p>                                                                                                                       | <p>笑能促进学习<br/>喜欢笑的孩子更聪明。愉快的气氛、有趣的笑话能帮助学习。一项研究发现，学生背单词，其中一些孩子学习后看了一段搞笑视频片段。一周后，学习后看过片段的孩子，记得单词比没看电影孩子多 20%。</p> |
| <p>笑是最好的体操<br/>微微一笑牵动面部 13 块肌肉，哈哈大笑，面部、胸部、腹部的肌肉都参加运动。笑能止痛</p>                                                                                                                        | <p>笑能提高免疫力<br/>生活像镜子，能照人影子。你哭它也哭,你笑它也笑。常哭病来了，常笑病没了。当人们看喜剧片的时候抽血化验，结果发现笑提高了免疫细胞的活力。</p>                         |
| <p>笑能延年益寿<br/>研究人员是从 184 名已故棒球运动员拍摄于 1952 年的照片入手分析的，他们根据照片上的面部表情把这些运动员分成了 3 种类型，分别是“面无表情”、“露齿微笑”和“开怀大笑”。那些几乎“面无表情”的人平均寿命在 72.9 岁左右，“露齿微笑”的人大约能够活到 75 岁，而“开怀大笑”的人平均寿命则达到了 79.9 岁。</p> | <p>咬咬铅笔，启动笑容<br/>在一项心理学实验中，两组人观看喜剧，其中一组被要求咬住铅笔，不让嘴唇碰到笔，以此来保持微笑，而另一组则一直皱眉，结果表明，咬铅笔的参与者看喜剧时感觉更快乐。</p>            |

2) 播放视频《婴儿笑》，烘托气氛。

## 四、回顾与结束

**目标：**统整全部课程，总结家长学校重点

**时间：**20 分钟

**材料：**

1. 活动照片作为礼物送给家长
2. 视频《路要自己走》

**要点：**

1. 总结课程
2. 表达感谢

1. 老师分发洗出来的照片送给大家作为礼物，大组讨论。

对家长学校的整体感受？  
家长学校对你有帮助吗？  
最有用的是哪一部分？  
你觉得最大的收获是什么？

2. 老师总结五次家长学校的重点内容。

这里老师可以通过问答的形式，帮助家长回忆学过的内容

|     |               |
|-----|---------------|
| 第一次 | 麦子需要空气，孩子需要关爱 |
| 第二次 | 麦子需要施肥，孩子需要教育 |
| 第三次 | 麦子需要水分，孩子需要沟通 |
| 第四次 | 麦子需要阳光，孩子需要欣赏 |
| 第五次 | 做健康快乐的麦子家长    |

3. 感谢和临别赠言。

老师的话：

在家长学校中，各位家长的出席是最我们工作的最大支持，谢谢大家！希望各位在这次活动中有所收获。现在请大家一起欣赏一首歌《路要自己走》，是从家长的角度写给孩子的。让我们在歌声中结束这次的家长学校。

《路要自己走》歌词

我知道对你来说这世界有一点复杂；我知道你肯付出却不懂该如何表达  
我知道你不喜欢成人世界的伪装；我知道关于未来你有自己的想法  
天地万物都有存在这世上的意义；没有一个人有放弃的权利  
我会牵著你的手但是路要自己走  
面对选择的时候听听心底宁静的角落  
有一天我会放手因为路要自己走  
失去方向的时候记得抬头仰望清澈的天空

4. 填写家长反馈表（附录 5）。

# 第三部分

## 附录

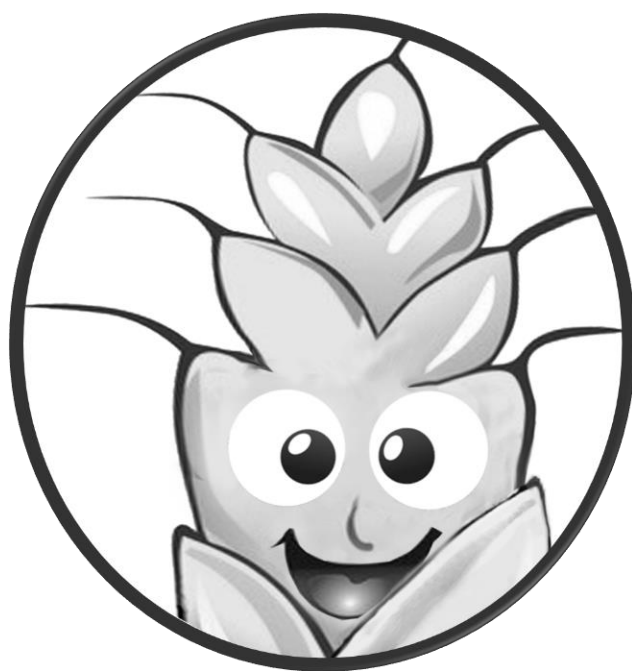



## 附录 1 家长学校实施的忠诚度评估表（助手填写）

- 使用时间:每次活动后
- 管理: 河南大学项目组成员
- 填写人: 助手
- 内容包括: 使用须知, 1-5 次课程评估表
  - 1:麦子需要空气, 孩子需要关爱
  - 2: 麦子需要施肥, 孩子需要教育
  - 3: 麦子需要水分, 孩子需要沟通
  - 4: 麦子需要阳光, 孩子需要欣赏
  - 5: 做健康快乐的麦子家长

### 使用须知:

- **每一次活动都对应有评估表。**填写人对应每一课的主要活动情况在相应“活动框”中进行评估。每次活动的评估都包括三项: 按照建议完成、按照建议完成但有所改变、未完成。
- **即时完成表格。**每次课程结束后立即完成表格以确保观测结果如实。
- **尽可能提供详尽反馈。**详尽的反馈将有助于本项目活动方案按建议实施。请在备忘栏中记录: 活动实施的任何改变, 以及有助于增强活动效果的建议。涉及活动内容、结构及材料的建议方面的建议非常宝贵, 希望评估员与方案实施人员进行沟通。

再次感谢您给予的帮助!

表格填写人: (请选其一)

(1) 助手 (2) 观察员

(3) 其他 (请具体说明) \_\_\_\_\_

(4) 姓名 \_\_\_\_\_ 日期 \_\_\_\_\_

## 家长学校第一次：麦子需要空气，孩子需要关爱

老师: \_\_\_\_\_ 助手: \_\_\_\_\_  
 日期: \_\_\_\_\_ 地点: \_\_\_\_\_  
 开始时间: \_\_\_\_\_ 结束时间: \_\_\_\_\_  
 开始时的家长数 \_\_\_\_\_ 结束时的家长数 \_\_\_\_\_

|                                       |                                                                                                                                                                                                                                                                                                                                                                                                                                                                                                                                                                                                                                               |                                                                                                                                                                 |
|---------------------------------------|-----------------------------------------------------------------------------------------------------------------------------------------------------------------------------------------------------------------------------------------------------------------------------------------------------------------------------------------------------------------------------------------------------------------------------------------------------------------------------------------------------------------------------------------------------------------------------------------------------------------------------------------------|-----------------------------------------------------------------------------------------------------------------------------------------------------------------|
| <p><b>在此注明取消，新增或变更活动的原因及调整建议：</b></p> | <p><b>一、破冰游戏：天气预报</b></p> <p><input type="checkbox"/> 依照建议完成<br/> <input type="checkbox"/> 依照建议完成，但有所改变<br/> <input type="checkbox"/> 未完成</p> <p><b>备注：</b></p>                                                                                                                                                                                                                                                                                                                                                                                                                                                                               | <p><b>三、主题活动：我家麦子</b></p> <p><input type="checkbox"/> 依照建议完成<br/> <input type="checkbox"/> 依照建议完成，但有所改变<br/> <input type="checkbox"/> 未完成</p> <p><b>备注：</b></p> |
|                                       | <p><b>二、主题活动：用爱耕耘</b></p> <p><input type="checkbox"/> 依照建议完成<br/> <input type="checkbox"/> 依照建议完成，但有所改变<br/> <input type="checkbox"/> 未完成</p> <p><b>备注：</b></p>                                                                                                                                                                                                                                                                                                                                                                                                                                                                               | <p><b>四、总结及预告</b></p> <p><input type="checkbox"/> 依照建议完成<br/> <input type="checkbox"/> 依照建议完成，但有所改变<br/> <input type="checkbox"/> 未完成</p> <p><b>备注：</b></p>     |
|                                       | <p><b>三、主题活动：用爱耕耘</b></p> <p><input type="checkbox"/> 依照建议完成<br/> <input type="checkbox"/> 依照建议完成，但有所改变<br/> <input type="checkbox"/> 未完成</p> <p><b>备注：</b></p>                                                                                                                                                                                                                                                                                                                                                                                                                                                                               |                                                                                                                                                                 |
|                                       | <p><b>多选，选出符合以下条件的选项：</b></p> <p><input type="checkbox"/> 老师和助手进行了自我介绍<br/> <input type="checkbox"/> 老师进行了项目介绍<br/> <input type="checkbox"/> 老师带领组员进行了破冰游戏《天气预报》<br/> <input type="checkbox"/> 老师用比喻介绍了五次家长学校活动的主题<br/> <input type="checkbox"/> 老师播放了《苹果树与男孩》<br/> <input type="checkbox"/> 家长们分享了观后感<br/> <input type="checkbox"/> 家长们分享了自己的育儿经历<br/> <input type="checkbox"/> 老师播放了《长江七号》片段<br/> <input type="checkbox"/> 家长们分享了自己孩子的优点<br/> <input type="checkbox"/> 老师进一步说明家长对孩子的影响<br/> <input type="checkbox"/> 老师播放了《父母是孩子最好的老师》及《父母怎样影响孩子》<br/> <input type="checkbox"/> 家长们分享了自己如何影响孩子<br/> <input type="checkbox"/> 老师进行了总结和预告</p> |                                                                                                                                                                 |

## 家长学校第二次：麦子需要施肥，孩子需要教育

老师: \_\_\_\_\_ 助手: \_\_\_\_\_  
 日期: \_\_\_\_\_ 地点: \_\_\_\_\_  
 开始时间: \_\_\_\_\_ 结束时间: \_\_\_\_\_  
 开始时的家长数 \_\_\_\_\_ 结束时的家长数 \_\_\_\_\_

|                                       |                                                                                                                                                                                                                                                                                                                                                                                                                                                                                                                                                                                                                 |                                                                                                                                                                      |
|---------------------------------------|-----------------------------------------------------------------------------------------------------------------------------------------------------------------------------------------------------------------------------------------------------------------------------------------------------------------------------------------------------------------------------------------------------------------------------------------------------------------------------------------------------------------------------------------------------------------------------------------------------------------|----------------------------------------------------------------------------------------------------------------------------------------------------------------------|
| <p><b>在此注明取消，新增或变更活动的原因及调整建议：</b></p> | <p><b>一、热身及复习</b></p> <p><input type="checkbox"/> 依照建议完成</p> <p><input type="checkbox"/> 依照建议完成，但有所改变</p> <p><input type="checkbox"/> 未完成</p> <p><b>备注：</b></p>                                                                                                                                                                                                                                                                                                                                                                                                                                                 | <p><b>三、主题活动：给麦子施肥</b></p> <p><input type="checkbox"/> 依照建议完成</p> <p><input type="checkbox"/> 依照建议完成，但有所改变</p> <p><input type="checkbox"/> 未完成</p> <p><b>备注：</b></p> |
|                                       | <p><b>二、主题活动：麦子的需要</b></p> <p><input type="checkbox"/> 依照建议完成</p> <p><input type="checkbox"/> 依照建议完成，但有所改变</p> <p><input type="checkbox"/> 未完成</p> <p><b>备注：</b></p>                                                                                                                                                                                                                                                                                                                                                                                                                                            | <p><b>四、总结及预告</b></p> <p><input type="checkbox"/> 依照建议完成</p> <p><input type="checkbox"/> 依照建议完成，但有所改变</p> <p><input type="checkbox"/> 未完成</p> <p><b>备注：</b></p>      |
|                                       | <p><b>多选，选出符合以下条件的选项：</b></p> <p><input type="checkbox"/> 家长们进行了热身活动《天气预报》</p> <p><input type="checkbox"/> 老师带领家长复习了上一次的内容</p> <p><input type="checkbox"/> 老师引导家长分享孩子有时候让他们担心的问题</p> <p><input type="checkbox"/> 老师播放视频《小孩不笨》</p> <p><input type="checkbox"/> 老师带领家长分析小孩出现问题行为的原因</p> <p><input type="checkbox"/> 老师带领家长通过回忆视频中家长的做法，总结出有效的教养方法</p> <p><input type="checkbox"/> 老师讲解教养孩子的有效原则及其方法</p> <p><input type="checkbox"/> 老师带领家长进行了活动施肥特例：学习问题</p> <p><input type="checkbox"/> 老师总结了：出现问题很正常，有效赏罚是正道</p> <p><input type="checkbox"/> 家长进行了游戏《击鼓传花》练习今天所学</p> <p><input type="checkbox"/> 老师进行了总结和预告</p> |                                                                                                                                                                      |

## 家长学校第三次：麦子需要灌溉，孩子需要沟通

老师: \_\_\_\_\_ 助手: \_\_\_\_\_  
 日期: \_\_\_\_\_ 地点: \_\_\_\_\_  
 开始时间: \_\_\_\_\_ 结束时间: \_\_\_\_\_  
 开始时的家长数 \_\_\_\_\_ 结束时的家长数 \_\_\_\_\_

|                                       |                                                                                                                                                                                                                                                                                                                                                                                                                                                                                                                                                                                                                                                                                                                          |                                                                                                                                                                      |
|---------------------------------------|--------------------------------------------------------------------------------------------------------------------------------------------------------------------------------------------------------------------------------------------------------------------------------------------------------------------------------------------------------------------------------------------------------------------------------------------------------------------------------------------------------------------------------------------------------------------------------------------------------------------------------------------------------------------------------------------------------------------------|----------------------------------------------------------------------------------------------------------------------------------------------------------------------|
| <p><b>在此注明取消，新增或变更活动的原因及调整建议：</b></p> | <p><b>一、热身及复习</b></p> <p><input type="checkbox"/> 依照建议完成</p> <p><input type="checkbox"/> 依照建议完成，但有所改变</p> <p><input type="checkbox"/> 未完成</p> <p><b>备注：</b></p>                                                                                                                                                                                                                                                                                                                                                                                                                                                                                                                                                          | <p><b>三、主题活动：跟孩子沟通</b></p> <p><input type="checkbox"/> 依照建议完成</p> <p><input type="checkbox"/> 依照建议完成，但有所改变</p> <p><input type="checkbox"/> 未完成</p> <p><b>备注：</b></p> |
|                                       | <p><b>二、主题活动：不自信的麦子</b></p> <p><input type="checkbox"/> 依照建议完成</p> <p><input type="checkbox"/> 依照建议完成，但有所改变</p> <p><input type="checkbox"/> 未完成</p> <p><b>备注：</b></p>                                                                                                                                                                                                                                                                                                                                                                                                                                                                                                                                                    | <p><b>四、总结及预告</b></p> <p><input type="checkbox"/> 依照建议完成</p> <p><input type="checkbox"/> 依照建议完成，但有所改变</p> <p><input type="checkbox"/> 未完成</p> <p><b>备注：</b></p>      |
|                                       | <p><b>多选，选出符合以下条件的选项：</b></p> <p><input type="checkbox"/> 家长进行了热身活动《手指操》</p> <p><input type="checkbox"/> 老师带领家长复习孩子需要的五大“养分”</p> <p><input type="checkbox"/> 老师带领家长通过《麦子扑克》复习不同问题行为背后缺乏的需要</p> <p><input type="checkbox"/> 老师播放了视频《不自信的 XX》</p> <p><input type="checkbox"/> 老师带领家长分析了孩子不自信的原因</p> <p><input type="checkbox"/> 老师播放了视频《小孩不笨-小孩的心理告白》</p> <p><input type="checkbox"/> 老师邀请家长分享自己有效鼓励孩子的方法</p> <p><input type="checkbox"/> 老师播放了《一直都想说》</p> <p><input type="checkbox"/> 老师带领家长学习了有效沟通秘籍（沟通的步骤）</p> <p><input type="checkbox"/> 老师带领家长学习了内功—用心听（沟通的原则）</p> <p><input type="checkbox"/> 老师带领家长学习了外功—用心说（沟通的内容）</p> <p><input type="checkbox"/> 家长进行了沟通练习《高手过招》</p> <p><input type="checkbox"/> 老师进行了总结和预告</p> |                                                                                                                                                                      |

## 家长学校第四次：麦子需要阳光，孩子需要欣赏

老师: \_\_\_\_\_ 助手: \_\_\_\_\_  
 日期: \_\_\_\_\_ 地点: \_\_\_\_\_  
 开始时间: \_\_\_\_\_ 结束时间: \_\_\_\_\_  
 开始时的家长数 \_\_\_\_\_ 结束时的家长数 \_\_\_\_\_

|                                       |                                                                                                                                                                                                                                                                                                                                                                                                                                                                                                            |                                                                                                                                                                      |
|---------------------------------------|------------------------------------------------------------------------------------------------------------------------------------------------------------------------------------------------------------------------------------------------------------------------------------------------------------------------------------------------------------------------------------------------------------------------------------------------------------------------------------------------------------|----------------------------------------------------------------------------------------------------------------------------------------------------------------------|
| <p><b>在此注明取消，新增或变更活动的原因及调整建议：</b></p> | <p><b>一、热身及复习</b></p> <p><input type="checkbox"/> 依照建议完成</p> <p><input type="checkbox"/> 依照建议完成，但有所改变</p> <p><input type="checkbox"/> 未完成</p> <p><b>备注：</b></p>                                                                                                                                                                                                                                                                                                                                            | <p><b>三、主题活动：独特的麦子</b></p> <p><input type="checkbox"/> 依照建议完成</p> <p><input type="checkbox"/> 依照建议完成，但有所改变</p> <p><input type="checkbox"/> 未完成</p> <p><b>备注：</b></p> |
|                                       | <p><b>二、主题活动：做孩子生命中的贵人</b></p> <p><input type="checkbox"/> 依照建议完成</p> <p><input type="checkbox"/> 依照建议完成，但有所改变</p> <p><input type="checkbox"/> 未完成</p> <p><b>备注：</b></p>                                                                                                                                                                                                                                                                                                                                   | <p><b>四、总结及预告</b></p> <p><input type="checkbox"/> 依照建议完成</p> <p><input type="checkbox"/> 依照建议完成，但有所改变</p> <p><input type="checkbox"/> 未完成</p> <p><b>备注：</b></p>      |
|                                       | <p><b>多选，选出符合以下条件的选项：</b></p> <p><input type="checkbox"/> 家长进行了热身活动《手指操》</p> <p><input type="checkbox"/> 老师带领了复习沟通的原则(平等、积极)和内容(内功、外功)</p> <p><input type="checkbox"/> 老师播放了视频《只有你能欣赏我》</p> <p><input type="checkbox"/> 家长分享了观后感</p> <p><input type="checkbox"/> 老师带领家长通过《麦子优点库》练习了如何表达欣赏和肯定</p> <p><input type="checkbox"/> 老师讲了引言故事《龙生九子，各显神通》</p> <p><input type="checkbox"/> 老师播放了视频《一块地总有一粒种子适合它》</p> <p><input type="checkbox"/> 家长进行了小组讨论和演练《我孩子的未来》</p> <p><input type="checkbox"/> 老师进行了总结和预告</p> |                                                                                                                                                                      |

## 家长学校第五次：做健康快乐的麦子家长

老师: \_\_\_\_\_ 助手: \_\_\_\_\_  
 日期: \_\_\_\_\_ 地点: \_\_\_\_\_  
 开始时间: \_\_\_\_\_ 结束时间: \_\_\_\_\_  
 开始时的家长数 \_\_\_\_\_ 结束时的家长数 \_\_\_\_\_

|                                        |                                                                                                                                                                                                                                                                                                                                                                                                                                                                                                                                                                                                                                                                                                                                   |                                                                                                                                                                        |
|----------------------------------------|-----------------------------------------------------------------------------------------------------------------------------------------------------------------------------------------------------------------------------------------------------------------------------------------------------------------------------------------------------------------------------------------------------------------------------------------------------------------------------------------------------------------------------------------------------------------------------------------------------------------------------------------------------------------------------------------------------------------------------------|------------------------------------------------------------------------------------------------------------------------------------------------------------------------|
| <p><b>在此注明取消, 新增或变更活动的原因及调整建议:</b></p> | <p><b>一、热身及复习</b></p> <p><input type="checkbox"/> 依照建议完成</p> <p><input type="checkbox"/> 依照建议完成, 但有所改变</p> <p><input type="checkbox"/> 未完成</p> <p><b>备注:</b></p>                                                                                                                                                                                                                                                                                                                                                                                                                                                                                                                                                                  | <p><b>三、主题活动: 独特的麦子</b></p> <p><input type="checkbox"/> 依照建议完成</p> <p><input type="checkbox"/> 依照建议完成, 但有所改变</p> <p><input type="checkbox"/> 未完成</p> <p><b>备注:</b></p> |
|                                        | <p><b>二、主题活动: 做孩子生命中的贵人</b></p> <p><input type="checkbox"/> 依照建议完成</p> <p><input type="checkbox"/> 依照建议完成, 但有所改变</p> <p><input type="checkbox"/> 未完成</p> <p><b>备注:</b></p>                                                                                                                                                                                                                                                                                                                                                                                                                                                                                                                                                        | <p><b>四、总结及预告</b></p> <p><input type="checkbox"/> 依照建议完成</p> <p><input type="checkbox"/> 依照建议完成, 但有所改变</p> <p><input type="checkbox"/> 未完成</p> <p><b>备注:</b></p>       |
|                                        | <p><b>多选, 选出符合以下条件的选项:</b></p> <p><input type="checkbox"/> 老师带领复习了第四次的内容</p> <p><input type="checkbox"/> 家长们进行了热身活动《盲人走路》</p> <p><input type="checkbox"/> 家长们进行了活动《麦子家长的烦恼》</p> <p><input type="checkbox"/> 家长们进行了活动《你帮我, 我帮你》</p> <p><input type="checkbox"/> 老师总结了: 施比受有福</p> <p><input type="checkbox"/> 老师讲解了养身(照顾身体)的口号</p> <p><input type="checkbox"/> 老师带领家长进行了活动《人物采访》</p> <p><input type="checkbox"/> 老师总结了三种养心(照顾心情)的方法</p> <p><input type="checkbox"/> 老师讲解了笑的功能</p> <p><input type="checkbox"/> 老师播放了视频《婴儿笑》</p> <p><input type="checkbox"/> 老师和助手发给大家照片作为礼物</p> <p><input type="checkbox"/> 老师总结了五次家长学校活动的重点内容</p> <p><input type="checkbox"/> 老师播放视频歌曲《路要一起走》, 结束团体</p> <p><input type="checkbox"/> 老师邀请家长填写反馈表</p> |                                                                                                                                                                        |

## 附录2 主讲老师自我效能自评表（培训后老师填写）

性别\_\_\_\_\_ 年龄\_\_\_\_\_ 年级：研\_\_\_\_\_ 专业方向\_\_\_\_\_

1. 您在培训前是否有做家长学校的经验？  
①是 ②否(跳到3题)
2. 您在培训之前是否学过团体心理辅导课程？ ①是 ②否
3. 您在培训之前是否带过促进家长教养技能的团体？ ①是 ②否
4. 您感觉是否从培训中得到了开展家长学校的技能？ ①是 ②否
5. 您对培训的满意程度是：①满意 ②比较满意 ③一般满意 ④不太满意 ⑤很不满意
6. 您对课程的熟悉程度是：①熟悉 ②比较熟悉 ③一般熟悉 ④不太熟悉 ⑤很不熟悉
7. 您觉的您对这个课程理念的掌握程度是？

|                                     | 好 | 比较好 | 一般 | 不太好 | 不好 |
|-------------------------------------|---|-----|----|-----|----|
| 第一次：爱、支持、身教言传                       | 1 | 2   | 3  | 4   | 5  |
| 第二次：行为背后的需要，有效赏罚                    | 1 | 2   | 3  | 4   | 5  |
| 第三次：沟通原则（平等、积极），沟通步骤（事件+情绪+积极建议和鼓励） | 1 | 2   | 3  | 4   | 5  |
| 第四次：欣赏、鼓励孩子的进步和独特性                  | 1 | 2   | 3  | 4   | 5  |
| 第五次：家长的自我照顾（养身+养心）                  | 1 | 2   | 3  | 4   | 5  |

8. 您觉的您这个课程的活动技术掌握的自信程度是？

|              | 有信心 | 比较有信心 | 信心一般 | 比较没信心 | 没有信心 |
|--------------|-----|-------|------|-------|------|
| 与家长建立关系的能力   | 1   | 2     | 3    | 4     | 5    |
| 与家长互动的能力     | 1   | 2     | 3    | 4     | 5    |
| 带动家长学校活动的的能力 | 1   | 2     | 3    | 4     | 5    |
| 语言表达能力       | 1   | 2     | 3    | 4     | 5    |
| 示范教学能力       | 1   | 2     | 3    | 4     | 5    |
| 共情与处理哀伤的能力   | 1   | 2     | 3    | 4     | 5    |

9. 您对带好家长学校的自信程度是？

①有信心 ②比较有信心 ③信心一般 ④比较没信心 ⑤没有信心

10. 您对家长学校的效果有信心吗？

①有信心 ②比较有信心 ③信心一般 ④比较没信心 ⑤没有信心

11. 请用下面问卷评价一下自己的心理弹性

| 请问以下描述是否符合你的情况？      | 完全<br>不符合 | 基本<br>不符合 | 基本<br>符合 | 完全<br>符合 |
|----------------------|-----------|-----------|----------|----------|
| 1. 我能够改变自己以适应生活环境的变化 | 1         | 2         | 3        | 4        |
| 2. 我能够和别人保持亲近和稳定的关系  | 1         | 2         | 3        | 4        |
| 3. 有时候人只能靠命运或老天帮忙    | 1         | 2         | 3        | 4        |
| 4. 我可以应付发生的任何事件      | 1         | 2         | 3        | 4        |
| 5. 过去的成功会增加我迎接新挑战的信心 | 1         | 2         | 3        | 4        |
| 6. 我能够看到事情中有趣的一面     | 1         | 2         | 3        | 4        |
| 7. 我应付压力的能力在不断提高     | 1         | 2         | 3        | 4        |
| 8. 生病或遇到困难后我恢复很快     | 1         | 2         | 3        | 4        |

| 请问以下描述是否符合你的情况?               | 完全<br>不符合 | 基本<br>不符合 | 基本<br>符合 | 完全<br>符合 |
|-------------------------------|-----------|-----------|----------|----------|
| 9. 任何事情发生总有它的原因               | 1         | 2         | 3        | 4        |
| 10. 不管遇到什么情况我总是尽我最大的努力        | 1         | 2         | 3        | 4        |
| 11. 我坚信只要努力, 就能实现自己的目标        | 1         | 2         | 3        | 4        |
| 12. 即使当事情看上去没有希望的时候, 我也不会轻易放弃 | 1         | 2         | 3        | 4        |
| 13. 我知道找谁寻求帮助                 | 1         | 2         | 3        | 4        |
| 14. 当我有压力的时候, 我能够做到集中注意力      | 1         | 2         | 3        | 4        |
| 15. 当解决问题时, 我愿意带头干            | 1         | 2         | 3        | 4        |
| 16. 我不会轻易被失败吓倒                | 1         | 2         | 3        | 4        |
| 17. 我觉得我自己是一个很坚强的人            | 1         | 2         | 3        | 4        |
| 18. 我能够做别人难以做出的或不受别人欢迎的决定     | 1         | 2         | 3        | 4        |
| 19. 我能处理好不愉快的心情               | 1         | 2         | 3        | 4        |
| 20. 有时候必须凭直觉做事                | 1         | 2         | 3        | 4        |
| 21. 我做事的目的性很强                 | 1         | 2         | 3        | 4        |
| 22. 我觉得我可以掌握我的生活/未来           | 1         | 2         | 3        | 4        |
| 23. 我喜欢挑战                     | 1         | 2         | 3        | 4        |
| 24. 我通过努力学习去实现我的目标            | 1         | 2         | 3        | 4        |
| 25. 我对我在生活中取得的成绩(进步)感到自豪      | 1         | 2         | 3        | 4        |

12. 请评价一下过去六个月内的你的情感状态, 选择符合自己程度的数字, 写在词旁边的横线上。

| 1<br>轻微或完全没有 | 2<br>只有一点点 | 3<br>有一些 | 4<br>很多 | 5<br>非常多 |
|--------------|------------|----------|---------|----------|
|--------------|------------|----------|---------|----------|

对事物充满兴趣  
痛苦  
心情兴奋  
烦恼  
坚强有力  
有罪恶感  
恐惧惊慌  
对人不友好  
有激情  
自豪

易怒烦躁  
机警灵敏  
羞愧  
富有创意  
紧张焦虑  
坚定不移  
聚精会神  
心神不宁  
积极活跃  
担心忧虑



附录3 主讲老师自我总结（每一次家长学校活动后主讲老师填写）

|      |              |        |  |
|------|--------------|--------|--|
| 主讲老师 |              | 家长出席状况 |  |
| 课程名称 |              |        |  |
| 课程日期 | 年月日          |        |  |
| 活动目标 | 目标达到与否：      |        |  |
|      | 未能达到目标的主要原因： |        |  |
| 执行过程 | 家长反应：        |        |  |
|      | 团体动力：        |        |  |
|      | 时间规划与掌握：     |        |  |
|      | 带领技巧能力：      |        |  |
| 综合评估 | 遇到的困难：       |        |  |
|      | 如何改进         |        |  |
|      | 心得感想         |        |  |

附录 4 家长对每一次活动评估卡（每一次活动后家长填写）

学校\_\_\_\_\_ 时间\_\_\_\_\_ 主讲老师\_\_\_\_\_

您对这一次家长学校的满意程度是？

|                                                                                   |                                                                                   |                                                                                   |                                                                                    |                                                                                     |
|-----------------------------------------------------------------------------------|-----------------------------------------------------------------------------------|-----------------------------------------------------------------------------------|------------------------------------------------------------------------------------|-------------------------------------------------------------------------------------|
|  |  |  |  |  |
| ( )非常不<br>喜欢                                                                      | ( )不喜欢                                                                            | ( )一般                                                                             | ( )喜欢                                                                              | ( )非常<br>喜欢                                                                         |

您对第二次家长学校的满意程度是？

|                                                                                   |                                                                                   |                                                                                   |                                                                                    |                                                                                     |
|-----------------------------------------------------------------------------------|-----------------------------------------------------------------------------------|-----------------------------------------------------------------------------------|------------------------------------------------------------------------------------|-------------------------------------------------------------------------------------|
|  |  |  |  |  |
| ( )非常不<br>喜欢                                                                      | ( )不喜欢                                                                            | ( )一般                                                                             | ( )喜欢                                                                              | ( )非常<br>喜欢                                                                         |

您对第三次家长学校的满意程度是？

|                                                                                     |                                                                                     |                                                                                     |                                                                                      |                                                                                       |
|-------------------------------------------------------------------------------------|-------------------------------------------------------------------------------------|-------------------------------------------------------------------------------------|--------------------------------------------------------------------------------------|---------------------------------------------------------------------------------------|
|  |  |  |  |  |
| ( )非常不<br>喜欢                                                                        | ( )不喜欢                                                                              | ( )一般                                                                               | ( )喜欢                                                                                | ( )非常<br>喜欢                                                                           |

您对第四次家长学校的满意程度是？

|                                                                                     |                                                                                     |                                                                                     |                                                                                      |                                                                                       |
|-------------------------------------------------------------------------------------|-------------------------------------------------------------------------------------|-------------------------------------------------------------------------------------|--------------------------------------------------------------------------------------|---------------------------------------------------------------------------------------|
|  |  |  |  |  |
| ( )非常不<br>喜欢                                                                        | ( )不喜欢                                                                              | ( )一般                                                                               | ( )喜欢                                                                                | ( )非常<br>喜欢                                                                           |

您对第五次家长学校的满意程度是？

|                                                                                     |                                                                                     |                                                                                     |                                                                                      |                                                                                       |
|-------------------------------------------------------------------------------------|-------------------------------------------------------------------------------------|-------------------------------------------------------------------------------------|--------------------------------------------------------------------------------------|---------------------------------------------------------------------------------------|
|  |  |  |  |  |
| ( )非常不<br>喜欢                                                                        | ( )不喜欢                                                                              | ( )一般                                                                               | ( )喜欢                                                                                | ( )非常<br>喜欢                                                                           |

## 附录 5 家长反馈表（家长学校五次活动结束后家长填写）

学校\_\_\_\_\_ 时间\_\_\_\_\_ 主讲老师\_\_\_\_\_

亲爱的家长：

我很希望了解你对活动的看法，请根据你的观察和感受，评价一下通过活动之后你在以下方面有进步：0=没有进步，1=有一些进步；2 很大进步。

**你进步了吗？**

|                   | 没有进步 | 有一些进步 | 很大进步 |
|-------------------|------|-------|------|
| 1. 与孩子的关系         | 0    | 1     | 2    |
| 2. 对孩子行为表现背后原因的认识 | 0    | 1     | 2    |
| 3. 关注积极行为         | 0    | 1     | 2    |
| 4. 弱化消极行为         | 0    | 1     | 2    |
| 5. 冷处理技能          | 0    | 1     | 2    |
| 6. 倾听孩子心声的能力      | 0    | 1     | 2    |
| 7. 与孩子沟通的能力       | 0    | 1     | 2    |
| 8. 鼓励孩子的能力        | 0    | 1     | 2    |
| 9. 寻求别人帮助的能力      | 0    | 1     | 2    |
| 10. 帮助别人的能力       | 0    | 1     | 2    |
| 11. 自我照顾的能力       | 0    | 1     | 2    |
| 12. 对于自己是个好父母的信心  | 0    | 1     | 2    |

**你的满意程度是？**

|             | 非常不满意 | 不满意 | 一般 | 满意 | 非常满意 |
|-------------|-------|-----|----|----|------|
| 1. 对带领活动的老师 | 1     | 2   | 3  | 4  | 5    |
| 2. 对带领活动的助手 | 1     | 2   | 3  | 4  | 5    |
| 3. 对整个活动团体  | 1     | 2   | 3  | 4  | 5    |

**如果以后有这样的活动，你还愿意参加吗？请选择一项。**

0.不愿意                      1 不一定                      2 愿意                      3 非常愿意

**你对 5 次活动的评分是：**（在一下空格里填上分数，分数为 0-5 分之间，0 为很不好，5 是很好）

麦子需要空气，孩子需要爱

麦子需要施肥，孩子需要教育

麦子需要水分，孩子需要沟通

麦子需要阳光，孩子需要鼓励

麦子妈妈也有自己的烦恼

## 参考文献

- Sandler, I., Schoenfelder, E., Wolchik, S., & MacKinnon, D. (2011). Long-term impact of prevention programs to promote effective parenting: lasting effects but uncertain processes. *Annual Review of Psychology*, 62, 299-329.
- Sanders, M. R. Triple P-Positive Parenting Program as a public health approach to strengthening parenting. *Journal of Family Psychology*. 2008;22:506-517.
- Rotheram, M. J. (n.d.). *Teens and Adults Learning to Commutate (TALC: NYC)*. Available at <http://chipts.ucla.edu/projects/talc-nyc/>
- Hofmann SG (2011). *An Introduction to Modern CBT. Psychological Solutions to Mental Health Problems*. Chichester, UK: Wiley-Blackwell.
- Shochet, I. Holland. D., & Whitefield, K. (2001). *Resourceful Adolescent Program*. Queensland University of Technology.
- Satir, V. (1988). *The new people making*. Mountain View, CA: Science and Behavior Books.
- 梁智强(导演) (2007). 小孩不笨 2.
- 陆芒(导演) (2012). 一直都想说.
- 于肖楠 (2010). 农村艾滋病感染者心理弹性小组手册. 香港城市大学

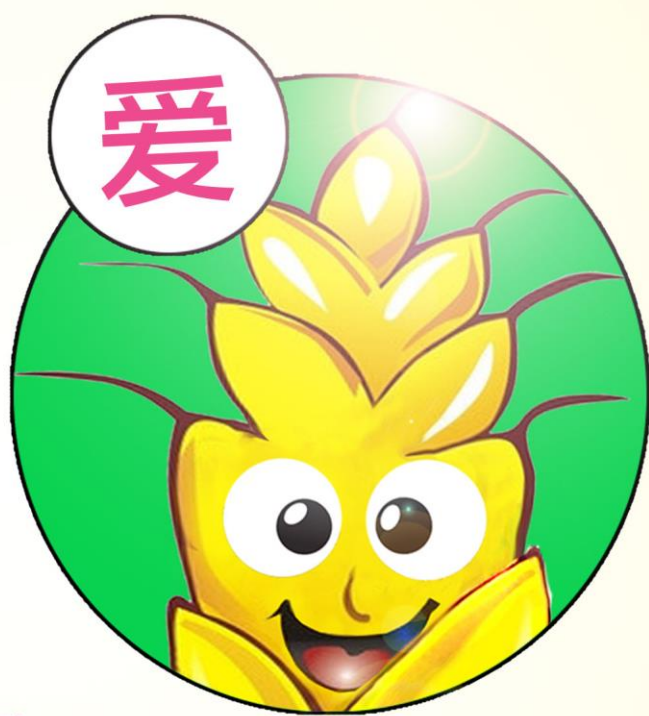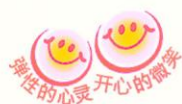

河南大学中美国际合作研究课题制作

# 儿童心理弹性项目

社区干预

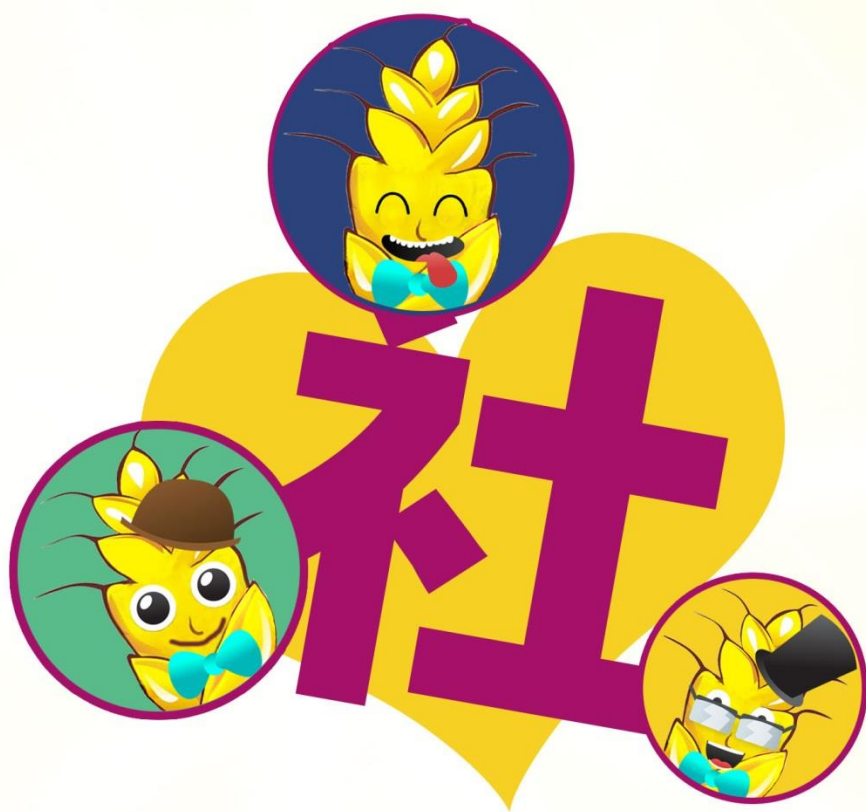

## 社区大使工作手册

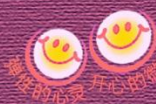

河南大学中美国际合作研究课题制作

# 儿童心理弹性项目

## 社区大使工作手册

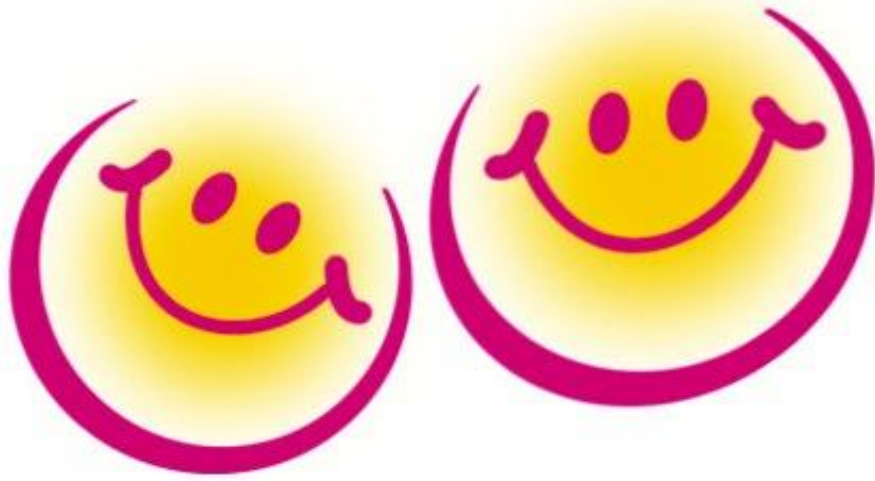

弹性的心灵，开心的微笑

# 目录

|                        |    |
|------------------------|----|
| .....                  | 1  |
| 第一部分 .....             | 1  |
| 项目介绍 .....             | 1  |
| 一、我们要做什么? .....        | 2  |
| 二、项目如何进行? .....        | 3  |
| 三、社区大使将如何开展工作? .....   | 3  |
| 四、对社区大使的要求是? .....     | 3  |
| 五、社区大使有何责任? .....      | 4  |
| 六、如何使用本手册? .....       | 4  |
| .....                  | 6  |
| 第二部分 .....             | 6  |
| 研究伦理 .....             | 6  |
| 一、心理学研究伦理道德.....       | 8  |
| 二、本研究相关伦理.....         | 9  |
| .....                  | 12 |
| 第三部分 .....             | 12 |
| 背景知识 .....             | 12 |
| 一、艾滋病症状.....           | 14 |
| 二、艾滋病的传播.....          | 15 |
| 三、艾滋病治疗及用药管理.....      | 16 |
| 四、艾滋病关爱的相关国家及地方政策..... | 17 |
| .....                  | 21 |
| 第四部分 .....             | 21 |
| 社区大使工作内容.....          | 21 |
| 工作内容之一：家访.....         | 23 |
| 一、家访的艺术.....           | 23 |



|                                   |           |
|-----------------------------------|-----------|
| 二、家访的技巧.....                      | 24        |
| 三、处理特殊问题.....                     | 25        |
| 四、讨论家访提纲.....                     | 28        |
| 五、角色扮演.....                       | 28        |
| 附件 1.1 家访提纲（抚养者） .....            | 31        |
| 附件 1.2 家访提纲（孩子） .....             | 33        |
| 附件 1.3 家访痕迹表（每一次家访后由社区大使记录） ..... | 35        |
| 附件 1.4 家访反馈表（每半年请家长填写一次） .....    | 37        |
| 附件 1.5 有用资源 .....                 | 39        |
| <b>工作内容之二：社区活动.....</b>           | <b>42</b> |
| 一、社区活动的目的.....                    | 42        |
| 二、社区活动的形式.....                    | 42        |
| 三、社区活动：我的计划书.....                 | 43        |
| 附件 2.1 可选的社区活动表 .....             | 45        |
| 附件 2.2 参考案例 .....                 | 47        |
| 附件 2.3 社区活动痕迹表 .....              | 49        |
| 附件 2.4 社区活动反馈表 .....              | 51        |
| <b>工作内容之三：社区讲座.....</b>           | <b>52</b> |
| 一、社区讲座.....                       | 52        |
| 二、讲座的主题.....                      | 52        |
| 三、社区讲座：我的计划书.....                 | 53        |
| 附件 3.1:讲座痕迹表.....                 | 54        |
| 附件 3.2 讲座反馈表.....                 | 56        |
| 附件 3.3 培训反馈表 .....                | 58        |
| 参考文献 .....                        | 59        |

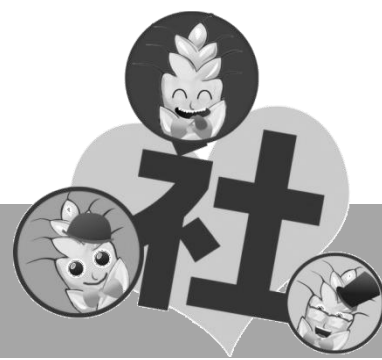

# 第一部分

## 项目介绍

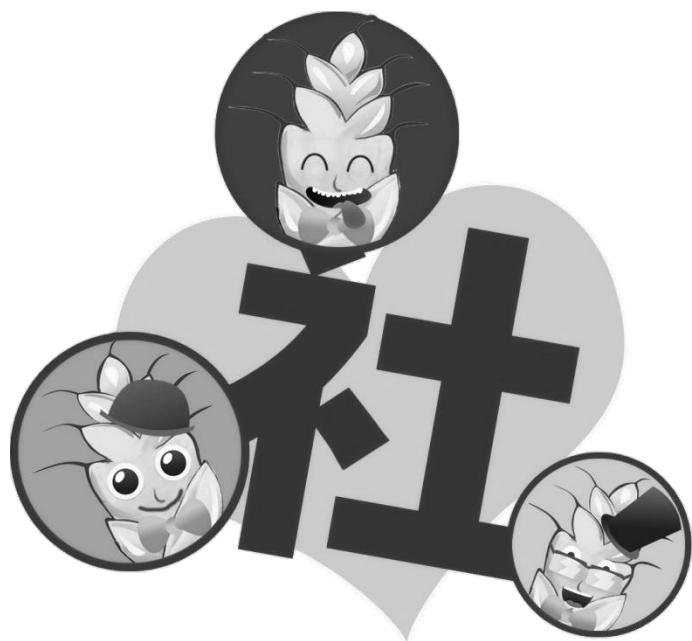

# 项目介绍

## 一、我们要做什么？

这是一项儿童心理健康促进的科研项目。根据以往研究理论，身处逆境的儿童如果有良好的家庭环境及社会环境，仍然能够获得健康的发展，在逆境中发展出一种心理品质——心理弹性。在这个项目中，我们希望通过社区支持的方式，向受艾影响儿童及其抚养者提供心理疏导及支持，从而为儿童成长提供良好的家庭环境和氛围。本项目希望通过家访、社区活动、社区讲座减少社会歧视，为儿童及其抚养者创造综合性的支持性环境，从而提高儿童及其家庭在应对各种生活困难中的心理弹性。具体表现在五个方面：

1. 确定社区（村庄）中影响儿童及其家庭幸福感的关键因素和问题；
2. 识别社区、政府商业部门中能够帮助儿童及其家庭的有效资源和优势；
3. 建立当地儿童及其家庭之间的互助网络；
4. 推动当地有利于儿童及其家庭的政策实施；
5. 提高对儿童及其家庭需要的社区意识。

在接受社区支持的同时，参与研究项目的 200 个家庭会同时接受儿童心理健康促进活动和家长学校教育技能促进活动。儿童将接受 10 次心理健康促进团体活动，其主要抚养人将接受 5 次的家长学校课程以提高其积极的教育技能。

社区大使支持、家长学校和儿童团体活动的最终目的是要通过提升儿童生活中的积极影响因素，从而减少父母去世及生病对孩子的消极影响，提高孩子的心理弹性，能够在现在以及将来的困难挑战中仍然健康成长。

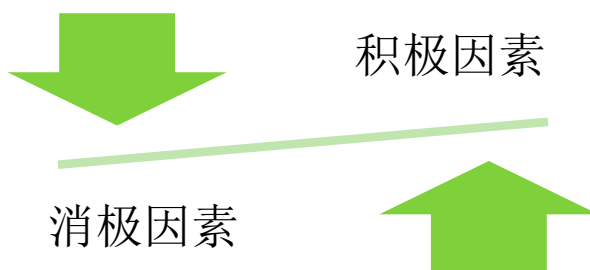

## 二、项目如何进行？

在干预的 10 个村庄中招募 10 名社区大使，每个大使负责 1 个村庄，约负责 20 个家庭（具体人数可根据实际情况调整），社区大使将持续工作 3 年招募标准包括：

1. 在当地有与受艾滋影响家庭保持良好关系的人员
2. 在当地有正式或非正式的领导能力（退休的公务员、村长、退休的卫生所医生、教师等）
3. 被受艾滋影响家庭所信任
4. 愿意每周工作 20 个小时支持受艾滋影响家庭（工作及交通补助：¥300/月）

社区大使的工作对象是受艾滋影响儿童或艾滋致孤儿及其主要抚养者的家庭。

## 三、社区大使将如何开展工作？

社区大使需要在三年内进行如下活动：

1. 每月到所在社区中的受艾滋影响儿童的家庭中进行**家访**
  - 不得少于 30 分钟
  - 为儿童和家庭提供必要的社会支持和情感支持
  - 必要的时候提供转介服务（如，儿童的上学的问题，抚养者 HIV 治疗依从问题）
2. 每半年组织一次**社区活动**
  - 有益于儿童及其家庭
  - 团体活动（春游、参观、烹饪比赛、跳绳比赛等）
  - 组织儿童和抚养者共同参加
3. 每半年做一次**社区讲座**
  - 受艾滋影响儿童及家庭的权利保障
  - 艾滋病知识普及
  - 减少社会歧视

## 四、对社区大使的要求是？

- ✓ 自愿
- ✓ 有责任心
- ✓ 积极主动，并全身心投入

- ✓ 服从课题的安排
- ✓ 尊重工作对象
- ✓ 共情的能力
- ✓ 良好沟通能力
- ✓ 与工作对象建立良好关系的能力
- ✓ 灵活处理各种突发事情的能力
- ✓ 有问题及时汇报
- ✓ 保密性原则

## 五、社区大使有何责任？

- ✓ 接受社区大使工作技能训练
- ✓ 参与每半年一次的工作总结会
- ✓ 遵守研究伦理（不得向外泄露受访者的信息、不得伪造访谈材料、不得违反课题要求）
- ✓ 按时返还研究有关材料（家访痕迹表及反馈表、家访录音、社区活动和社区讲座痕迹表及反馈表）

## 六、如何使用本手册？

本手册包括四个部分，第一部分是关于我们研究项目的简要介绍，第二部分是有关的研究伦理，第三部分是关于艾滋病的基本知识及国家地方政策，第四部分是社区大使工作技能训练。

社区大使在工作中可以使用培训中所学技能开展工作，按时填写、保留、返还研究过程中的录音、痕迹表等材料。有问题可以及时与项目负责人员联系。

# 第二部分

## 研究伦理

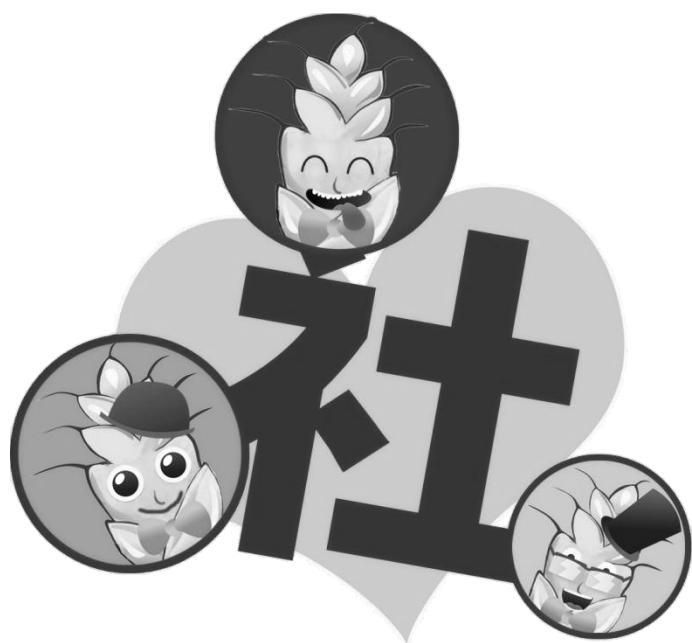

# 研究伦理

## 一、心理学研究伦理道德

在心理学研究中，以人为被试的研究需遵循伦理道德准则。在我们的研究过程中，对研究人员最基本的要求是公平、仁慈，尊重每一位被试。

美国心理学协会为研究者提供了道德准则指南，列出了以人为被试的研究中的十条一般性原则。为了在研究中保护被试的利益，我们要探讨以人为被试的研究准则。

(1) 研究者在计划一项研究时，有责任认真评估适宜该研究的道德准则。这种评估应当从科学和人类的价值出发，充分考虑各项原则的不足。因此，寻求道德准则和保护人类被试免受伤害的种种措施，理所当然成了研究者应尽的义务和职责。

(2) 研究者考虑的首要道德准则是，根据公认的标准，考察是否“被试处于危险”或“被试处于最低限度的危险”。

(3) 研究者在研究工作中有责任自始至终地遵守并贯彻道德准则。研究者也有责任使项目合作者、助手、学生和雇员接受道德教育，因为他们也应尽相应的义务和责任。

(4) 除了最低限度的危险之外，研究者应在被试参与研究之前，与被试达成清楚和公平的协议，以澄清每个人的义务和责任。研究者有责任在协议中以个人名义作出保证和承诺。研究者须告诉被试所有关于研究项目的特点，尽管这会影响到被试乐意参与研究的程度。研究者也可以解释被试希望了解的其他方面的情况。但是，片面强调保护被试的利益和尊严而不惜泄露全部研究计划也是不足取的。由于儿童和残疾被试有理解和（或）交流上的困难，所以有这类被试参与的研究应当采取特别的保护措施。

(5) 由于方法学的要求，研究者在进行此类研究之前特别应该做到：1、根据研究的科学、教育或应用价值确定是否使用这些技术；2、是否有替代方案，而不采取隐瞒或欺瞒；3、应尽可能给参与者提供充分的解释。

(6) 研究者应尊重被试在任何时候有终止或退出研究的自由。当研究者相对被试而言是权威或处于主控者地位时，那么，研究者需要深思熟虑，因为他们有保护这种自由的责任。这种权威地位包括但并不局限于以下情况：充当被试是其工作的一部分，或者被试是研究者的学生、患者或雇员。

(7) 研究者要保护被试免遭因研究过程引起的肉体和精神上的不适、伤害和危险。如果存在这样的风险，研究者应预先将风险事实通知被试。如果研究可能给被试造成严重的或持久

的伤害，该研究程序只能废弃。除非使用这种程序不当才会给被试造成更大的伤害，或者除非研究会有更大的利益，并全部通知被试且取得每个被试自愿同意的情况下，才能使用这种带风险的研究程序。被试应当被告知，如果研究过程中出现应激、潜在伤害、相关问题或忧虑，可以在适当的时候与研究取得联系。

(8) 研究完成并获得数据后，实验者应向被试提供所有易于理解的研究真相，尽量消除被试可能产生的任何误解。当科学的和人文方面的价值需要推迟或隐瞒时，研究者有监督研究的特殊职责，以确保被试不会受伤害。

(9) 当研究过程给被试造成未曾预料的后果时，研究者有责任查明、排除或纠正这些后果，包括其长期影响。

(10) 研究过程中获悉的有关被试的信息是秘密的，除非事先得到被试的同意。当其他人有接触这些信息的可能性时，研究者应当向被试解释这种可能性与计划的保密性是研究程序的一部分，以得到被试的同意。

## 二、本研究相关伦理

### 1. 保密原则

- 社区大使必须确保所有家庭的隐私受到保护。

隐私是指对于个体与他人所分享的内容，时间，具体情况的选择。如果参与研究的家庭在研究中给予了信息，他们是出于信任关系。他们希望这些信息可以仅用于必要的研究。

- 社区大使必须确保从儿童或抚养者那里获得的信息不外传。
- 信息不应该用于知情同意中未包括的情况
- 为了确保机密性，社区大使可以：
  1. 用编码替代标识符（比如，姓名）；
  2. 去掉获得研究工具（如表格）中标有姓名/地址的页面；
  3. 限制可识别被试身份的数据的获得；
  4. 在安全地方保存纸笔记录；
  5. 对电脑记录设置安全密码。

### 2. 尊重原则

- 在被试非自愿暴露与 HIV 有关信息时，不能触及有关的问题



➤ 对访谈过程中对被访儿童或抚养者的消极情绪的进行恰当处理

1. 社区大使及时处理：共情&关心
2. 转介给研究小组中的专家
3. 转介给有关机构

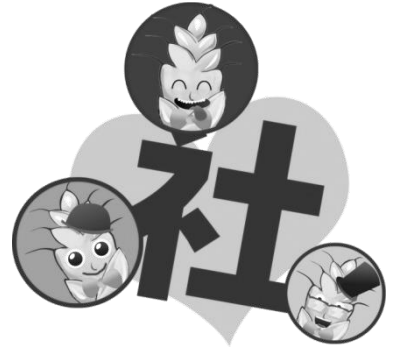

# 第三部分

## 背景知识



# 背景知识

## 一、艾滋病症状

HIV 是艾滋病病毒（Human Immunodeficiency Virus）的缩写，是一种能生存于人的血液中并攻击人体免疫系统的病毒。它把人体免疫系统中最重要 CD4 淋巴细胞作为攻击目标，大量吞噬、破坏 CD4 淋巴细胞作为自己生长发育的营养，随着 CD4 细胞数量的下降，人体的整个免疫系统逐渐遭到破坏，最终人体丧失对各种疾病的抵抗能力而感染多种疾病死亡。科学家把这种病毒叫做“人类免疫缺陷病毒”，是 1986 年国际微生物学会及病毒分类学会统一命名的专用名词。如果一个人血液检查初筛为 HIV 阳性，确认检查之后仍然为阳性，那么就可以肯定这个人感染了 HIV，99% 以上的人在感染 HIV 后 1—3 月能检查出来。

AIDS（Acquired Immunodeficiency Syndrome）是人类获得性免疫缺陷综合征的英文缩写，即中文音译的“艾滋病”。艾滋病是 1981 年在美国的男性同性恋中首次发现，1982 年正式命名为“获得性免疫缺陷综合征”。这个命名表达了艾滋病的完整概念，从中我们可以了解到艾滋病的三个明确含义：

（1）获得性：表示在病因方面是后天获得而不是先天具有的，艾滋病是由 HIV 引起的传染病。主要通过性接触、静脉吸毒、血液接触、围产期等途径传染；

（2）免疫缺陷：表示在发病机理方面，主要是造成人体免疫系统的损伤而导致免疫系统的防护功能减低、丧失；

（3）综合征：表示在临床症状方面，由于免疫缺陷导致的各个系统的机会性感染、肿瘤而出现的复杂症状群；

从以上介绍得知，HIV 只是一种病毒，而 AIDS 是一种疾病，临床医学规定每微升血液中的 CD4 细胞少于 200 个的个体就由 HIV 感染者发展为 AIDS 病人了。由上看出感染了病毒并不一定就是艾滋病，从感染 HIV 到发展为 AIDS 的潜伏期比较长，一般的 HIV 感染者在不治疗的情况下可以携带病毒生存 8-10 年，治疗以后大部分感染者的生存期会延长，可以达到 15 年甚至更长。

感染艾滋病之后，一般会经历急性感染期，潜伏期，艾滋病期，详细叙述如下：

### （1）急性感染期

即艾滋病窗口期后的症状，HIV 侵袭人体后对机体的刺激所引起的反应，一般感染 HIV 后一个月出现。病人发热、皮疹、淋巴结肿大、还会发生乏力、出汗、恶心、呕吐、腹泻、咽

炎等。有的还出现急性无菌性脑膜炎，表现为头痛、神经性症状和脑膜刺激症。末梢血检查，白细胞总数正常，或淋巴细胞减少，单核细胞增加。急性感染期时，症状常较轻微，容易被忽略。在被感染 2—6 周后，血清 HIV 抗体可呈现阳性反应。此后，临床上出现一个长短不等的、相对健康的、无症状的潜伏期。

### (2) 潜伏期

感染者可以没有任何临床症状，但潜伏期不是静止期，更不是安全期，病毒在持续繁殖，具有强烈的破坏作用。潜伏期指的是从感染 HIV 开始，到出现艾滋病临床症状和体征的时间。艾滋病的平均潜伏期，现在认为是 2-10 年。这对早期发现病人及预防都造成很大困难。

### (3) 艾滋病前期

潜伏期后即开始出现与艾滋病病症有关的症状和体征，直至发展成典型的艾滋病。这个时期，病人会出现艾滋病的基本特点，即细胞免疫缺陷，只是症状较轻而已。

### (3) 艾滋病期

有的学者称其为致死性艾滋病，是艾滋病病毒感染的最终阶段。此期具有三个基本特点：严重的细胞免疫缺陷、发生各种致命性机会性感染、发生各种恶性肿瘤。艾滋病的终期，免疫功能全面崩溃，病人出现各种严重的综合病症，直至死亡。

## 二、艾滋病的传播

### 1. 艾滋病在中国的发现与发展

中国在 1985 年发现首例艾滋病病例（世界上第一例艾滋病患者是 1981 年在美国发现的），是北京协和医院收治的来华旅游的美国人，同年末中国预防医学科学院艾滋病检测中心发现四例血友病患者因接受外国血液制品感染了艾滋病，结束了中国人认为艾滋病是“洋人病”的心态。

自 1985 年，我国艾滋病感染人数逐年上升。中国性病艾滋病预防控制中心数据显示。截至 2011 年底，估计中国存活艾滋病病毒感染者和艾滋病病人 78 万人，女性占 28.6%；艾滋病病人 15.4 万人；全人群感染率为 0.058%。估计 2011 年当年新发艾滋病病毒感染者 4.8 万人，2011 年艾滋病相关死亡 2.8 万人。在 78 万艾滋病病毒感染者中，经异性传播占 46.5%，经同性传播占 17.4%；经注射吸毒传播占 28.4%，其中，云南、新疆、广西、广东、四川和贵州 6 个省注射吸毒传播艾滋病病毒感染者估计数之和，占全国该人群估计数的 87.2%；经既往有偿采供血、输血或使用血制品传播占 6.6%，其中，河南、安徽、湖北和山西 4 省的估计数之和，占全国该人群艾滋病病毒感染者估计数的 92.7%；经母婴传播占 1.1%。

### 2. 艾滋病的三大传播途径

HIV 主要有三种传播途径：性传播、血液传播、母婴传播。性传播是男女在性交过程中的传播，传染率因为性交方式和男女的不同而不同，一般男性被传染率为 1-2%，女性被传染率

为 2-4%；肛交比阴道性交的传染率要高出 2-4 倍。血液传播是接触到一定量的被艾滋病病毒污染的血液导致的传播，输入被 HIV 感染的血液是导致感染的最大危险。母婴传播是母亲在怀孕、生产和哺乳的过程中将 HIV 传染给孩子。

目前在中国的 5 种流行传播途径中，注射吸毒的占 68%；采血传播的占 9.75%；血液、血浆制品占 1.5%；异性、同性性接触传播占 7.25%；而母婴传播只占 0.25%。经采血感染 HIV 的人群就是本研究中的有偿献血艾滋病患者。

### 3. 有偿献血艾滋病的特殊传播方式

在上文提到的采血感染，国内一般称之为有偿献血感染，称感染者为有偿献血艾滋病患者（Paid Blood Donors with HIV）。中国某些农村地区 1991-1995 年期间有大批青壮年农民加入了有偿献血的队伍，女性居多。当时采用的是“单采血浆”的方式，即将众多同一血型的献血者的血液抽出来之后一起放入分离机进行分离，然后将上层血浆收走，下层的血细胞再输回不同的献血者身上，这样有偿献血者输回来的血绝大部分已不再是自己的了。“单采血浆”存在的隐患是，如果其中有一个有偿献血者感染了 HIV、肝炎病毒，那么在一起分离血液的人都有感染这些疾病的机会。当时的情况是，因为采血人员和有献血者双方艾滋病知识匮乏，并没有进行 HIV 检测，更没有意识到 HIV 病毒传播的恶劣性及其危害性。这样很多已经是 HIV/AIDS 患者的静脉吸毒者也加入到了有偿献血的行列，所以致使有偿献血中 65% 以上的人感染了艾滋病。经采血途径感染 HIV 的人数占中国 HIV 感染者的 6.6%。根据中国疾控中心的疫情报告。截止 2011 年底，累计报告 HIV 感染者和 AIDS 病人数排在前六位的省份依次为云南、广西、河南、四川、新疆和广东。截至 2010 年底，河南省累计确认艾滋病感染者 49335 人，其中现症病人 27786 人，死亡 14680 人。全省疫情虽然仍处于上升趋势，但增幅有所下降，连续 3 年报告艾滋病感染者人数逐年递减 300 例左右。

## 三、艾滋病治疗及用药管理

可以通过由三种或三种以上抗逆转录病毒药物组成的抗逆转录病毒联合疗法抑制艾滋病毒。抗逆转录病毒治疗虽无法治愈艾滋病毒感染，但可以控制体内病毒复制，并增强人体免疫系统，恢复其抗感染能力。通过抗逆转录病毒治疗，艾滋病毒感染者可以过上健康和丰富的生活。

2011 年底，在低收入和中等收入国家中，共有 800 多万名艾滋病毒携带者接受抗逆转录病毒治疗，其中约有 56.2 万名儿童。

2011 年，在低收入和中等收入国家大约 150 万艾滋病毒阳性孕妇中，57% 接受了有效的抗逆转录病毒药物治疗，以防母婴传播。在国内，艾滋病患者由各地区的疾病预防控制中心负责，每年会定期免费进行体检，定期检测 CD4，如果 CD4 低于 350 之后，会提供免费的抗病毒药物进行治疗。所有患者的资料都是保密的。

## 四、艾滋病关爱的相关国家及地方政策

### 1. 受艾滋影响的儿童

- ✓ 受艾影响的儿童是指父母有一方或双方都有患有艾滋病的儿童。
- ✓ 艾滋致孤的儿童是指父母一方或双方因艾滋病而去世的儿童。
- ✓ 儿童的主要抚养者一般有以下几个类型：1) 亲生父母；2) 隔代（外）祖父母；3) 父方或母方的亲属（如，父方的伯、叔、姑，母方的姨、舅）；4) 阳光家庭的寄养父母

### 2. 国家“四免一关怀”政策

卫生、教育、人力资源社会保障等部门要坚持不懈地落实“四免一关怀”政策，努力消除对感染者和病人及其家庭成员在就医、就业、入学等方面的歧视。“四免一关怀”中的“四免”分别是：

1) **免费药物及治疗**。农村居民和城镇未参加基本医疗保险等医疗保障制度的经济困难人员中的艾滋病病人，可到当地卫生部门指定的传染病医院或设有传染病区（科）的综合医院服用免费的抗病毒药物，接受抗病毒治疗；

2) **免费检测**。所有自愿接受艾滋病咨询和病毒检测的人员，都可在各级疾病预防控制中心和各级卫生行政部门指定的医疗等机构，得到免费咨询和艾滋病病毒抗体初筛检测；

3) **免费母婴阻断**。对已感染艾滋病病毒的孕妇，由当地承担艾滋病抗病毒治疗任务的医院提供健康咨询、产前指导和分娩服务，及时免费提供母婴阻断药物和婴儿检测试剂；

4) **免费义务教育**。地方各级人民政府要通过多种途径筹集经费，开展艾滋病遗孤的心理康复，为其提供免费义务教育。

“一关怀”指的是国家对艾滋病病毒感染者和患者提供救治关怀，各级政府将经济困难的艾滋病患者及其家属，纳入政府补助范围，按有关社会救济政策的规定给予生活补助；扶助有生产能力的艾滋病病毒感染者和患者从事力所能及的生产活动，增加其收入。

这个政策的作用具体表现在以下几个方面：

**减轻医疗负担**。提高艾滋病救治的保障水平，进一步减轻医疗费用负担。在继续落实免费抗病毒治疗和医疗保险报销政策的基础上，民政等部门要针对合并机会性感染的病人实际情况，对抗机会性感染治疗的费用通过医疗救助给予解决，地方政府要对生活困难的病人提供帮助，切实减轻其医疗费用负担。民政、红十字会等部门和单位要加强对感染者和病人的救助工作及晚期病人的情感支持和临终关怀，将符合条件的感染者和病人纳入最低生活保障，并保护他们的隐私。

**促进合法就业。**扶贫、人力资源社会保障等部门要把政府救助与倡导、动员爱心行动相结合,把艾滋病综合防治与扶贫开发相结合,支持生活困难的感染者和病人开展生产自救,依法保障有劳动能力且有就业意愿的感染者和病人的合法就业权益。

**促进儿童发展。**财政、教育部门要制定和落实对因艾滋病造成的困难家庭子女就读普通高中、高等学校的救助、减免政策。民政部门要将艾滋病致孤儿童全部纳入孤儿保障制度;对感染艾滋病病毒的儿童或患儿,适当补助基本生活费。民政、教育等部门要加强对受艾滋病影响儿童心理辅导工作,保障儿童健康成长。

**教育和防治工作。**宣传、卫生等部门要加强对感染者和病人的法制宣传和道德教育,增强其法制观念,提高其社会责任感,督促感染者和病人及时将感染状况告知其配偶或有性关系者。公安、司法部门要会同有关部门依法打击故意传播艾滋病和利用感染者身份进行的违法犯罪活动,建立健全对违法犯罪感染者和病人的监管制度,做好其回归社会后的治疗、救助等衔接工作,维护社会和谐稳定。卫生、外交、教育、公安、人力资源社会保障、质检、外专等部门要积极配合,共同做好在华外国人艾滋病防治工作。

### **3. 河南省相关政策**

#### **1) 医疗保障**

做好救助关怀工作,提高患者生存质量。发展改革、卫生、人力资源社会保障、财政、食品药品监管等部门要根据艾滋病治疗需要和医保基金、财政等各方面承受能力,在基本药物目录中适当增加抗艾滋病病毒治疗和机会性感染治疗药品的种类,扩大用药范围。人力资源社会保障、财政、卫生、民政等部门要结合医药卫生体制改革,不断完善艾滋病治疗管理体制机制,逐步提高医疗保障水平,加大医疗救助力度,探索解决艾滋病病人患非艾滋病原因疾病的治疗困难。

#### **2) 儿童关怀**

民政部门要认真落实受艾滋病影响儿童福利保障政策,逐步提高受艾滋病影响儿童生活补助标准,确保受艾滋病影响儿童的生活补助及时发放。各地要认真落实对艾滋病病毒感染者和艾滋病病人以及艾滋病致孤人员、艾滋病单亲家庭未成年子女、艾滋病患者家庭成员的登记、上报和随访制度,简化救助资金发放程序,确保各项救助措施落到实处。健全艾滋病致孤人员安置抚育制度,采取收养、家庭寄养、模拟家庭养育和机构供养等多种途径妥善安置。进一步探索受艾滋病影响儿童救助安置方式,在阳光家庭和阳光家园建设基础上,积极稳妥地推广家庭化的儿童养育模式,为艾滋病致孤儿童健康成长创造良好条件。在农村地区,要将救助工作与扶贫开发等工作紧密结合,支持艾滋病病毒感染者和艾滋病病人开展生产自救。继续按照政策要求做好艾滋病致孤人员的医疗救治工作。

加强权益保护,促进社会和谐。认真落实相关政策,努力消除社会歧视,保障艾滋病病毒感染者和病人及其家庭成员在就医、就业、入学等方面的合法权益。加强艾滋病防治定点综合医院及传染病医院的学科和能力建设,提高综合诊疗能力,保障感染者和病人的诊疗权益。加强对艾滋病病毒感染者和病人的法制、道德教育,增强其社会责任感,引导其积极参与艾滋病防治工作。依法打击故意传播艾滋病行为和利用感染者、病人身份进行的违法犯罪活动。

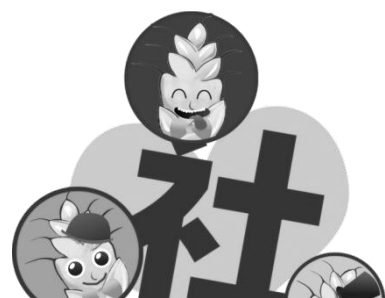



# 第四部分

## 社区大使工作内容



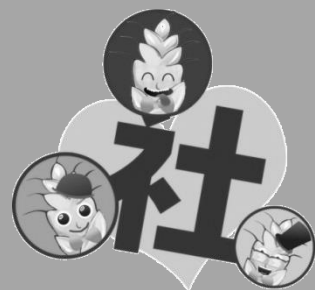

## 工作内容之一：家访

每月到所在社区中的受艾滋影响儿童的家庭中家访

- 不得少于 30 分钟
- 为儿童和家庭提供必要的社会支持和情感支持
- 必要的时候提供转介服务（如，儿童的上学的问题，抚养者 HIV 治疗依从问题）
- 被访对象可以是单个家庭成员（如，家长，孩子），也可以是几个成员一起
- 工作的重点在于通过主动关怀、陪伴倾听、哀伤辅导、心理抚慰、活动减压等方式，为儿童及其家庭提供社会支持服务，帮助他们减缓精神压力、消除心理阴霾。

### 一、家访的艺术

在家访之前准备是必要的，主要环节可分为事先约定、事前准备和上门注意等几个方面。

1.事先的约定是首先要做的，除非无法联系，否则是不适宜贸然上门的。

2.上门前还要做一些准备。这些准备包括三个方面：一是针对服务对象的，包括服务对象个人和家庭的基本情况、背景资料、在家时间等。二是针对社区大使自己的，包括社区大使的上门计划、内容和时间安排、穿着打扮等。社区大使要针对服务对象进行一些配套打扮，但更应该保持自身形象的职业性和专业性。三是要准备一些可以提供给服务对象的资料，如社区大使机构或社区的资料、社区大使的名片以及与上门有关的事宜等。

3.上门可以关注这么几个细节：到达时间、敲门、称呼对方、自我介绍、进门。一般认为，提前到达 5 分钟左右较为适宜，提前两三分钟到 10 分钟为合理区间，这样既不迟到也不会太早地打扰对方。

4.称呼对方要视对方的情况而定，较社区大使年长者可以冠以姓氏再尊称大爷大妈、叔叔阿姨，年轻者可以直呼其名，但切记不要读错。如果对方还有什么雅号、绰号可以使用也要当心，总的原则是污辱性的不可以用，如果确信可以用雅号，用了雅号后还可以连用其本名，得当的称呼是亲近服务对象的一大关键。

5.自我介绍则要求正规，说明白自己的机构、姓名，表示自己是和对方约好现在上门会面，但是自报家门时发音要清晰，如果人家反问了两遍以上就有点头疼了。

## 二、家访的技巧

对人尊重的态度和同感的理解是需要通过语言来传递或表达的，因此，沟通双方运用语言的能力和艺术是取得良好沟通效果的关键。

### 1.言语技巧

把话说得悦耳，悦耳的声音会令人心情舒畅。第二，把话说得清楚，必须让人明白所要传达信息的意思，这就要求沟通者思维有条理，吐字清晰，把意思说明白。第三，把话说得准确，要完整地表达句意，说话用词尽量科学准确。第四，把话说得恰当，说话必须符合特定的身份和场合。例如，如何说好第一句话?“最近家里怎么样啊?”

### 2.非言语技巧

身体符号包括人的眼神、面部表情、身体的姿势、动作及仪表等。在谈话的过程中，要注意自己的身体语言，不能表现出傲慢或者瞧不起别人的姿势。

一般而言，人与人之间相隔 0 厘米~15 厘米是亲密距离，其语意是亲密而热烈；15 厘米~75 厘米是个人距离，语意是亲切友好；75 厘米~215 厘米是社交距离，语意是严肃而正式；215 厘米以上是大众距离，表明彼此之间没有太深的交情。在家访的时候，我们可以与访问者保持 15 厘米~75 厘米是个人距离，也就是说互相伸手可以碰到对方的距离就可以。坐在椅子上，上身略微前倾。前倾的姿势意味着“我对你和你说的话感兴趣”、“我对你友好的”。双手放开而不是抱住双肩。谈话时应与别人保持稳定、坦诚的视线接触，而不是眼睛盯在别处或四处巡视。

另外，时间在传递信息中具有不可替代的作用。与人约会姗姗来迟，传达给对方的可能是不认真、时间观念不强、对对方不重视等信息，进而会引起对方很多的心理活动：失落-、不信任、不愿意合作等。所以我们约好时间以后，要准备或者提前 5 分钟到达。

### 3.怎样问问题

- ✓ 社区大使应该以平时说话的语速和语气来问问题。
- ✓ 研究者将以口语化的方式来编写问题，社区大使可以按照我们编写的问题提纲来提问，但是社区大使也不要像念书一样逐字逐句的念问题，而应该像聊天一样提问。
- ✓ 语速不要太快，因为有些居民可能不好意思要求社区大使再重复一遍问题，如果他们听不懂的话，他们可能会猜测这个问题是什么，影响结果的准确性。如果居民没听懂问题，社区大使应该按照访谈提纲的内容准确的再重复一遍。

- ✓ 一般情况下，社区大使不需要对问题作特殊的强调，除非遇到了以下情况：（a）受访人由于忽略了问题中的某个词语从而影响了问题的理解，这时你可以向他/她再强调一遍这个词语；（b）研究者在访谈中特别标注，需要社区大使强调的词语。

#### 4.怎样获得有效的回答

- ✓ 社区大使应该始终保持客观的态度，不要试图使居民同意你们的看法，不要试图诱导居民作出符合你们期望的回答。
- ✓ 对每个问题都要尽最大可能来获得最有效的答案，如果居民的回答偏离了问题的目的，可以对这个问题进行追问，直到得到有效的回答。

#### 5.怎样追问

- ✓ 当居民在回答问题出现犹豫时；在不知道如何表达自己的意思时；在不好意思回答时；或是在你认为居民没有提供足够准确完整的回答时，你需要给他们以信心，让他们相信自己能够给出更完整的回答。
- ✓ 追问最有效的策略就是“安静等待”和“重复原问题”。只要社区大使能够足够耐心，安静的等待被试思考，甚至在 15 秒内居民就可以自己澄清之前给出的不完整的回答。重复问题本身也是一种有效的追问方法，需要再次强调的是，一定要严格按照研究者给出的问题来提问，不能擅自添加内容。要始终牢记：保持客观，不要试图诱导他们。

## 三、处理特殊问题

### 1.一般问题

- ✓ 居民说“我不明白这个问题是什么意思，你能给我解释一下吗？”，你该怎么办？
- ✓ 如果你刚提出了问题，居民就回答“我不知道”，你该怎么办？
- ✓ 如果居民回答说“这个问题要看具体情况而定”，你该怎么办？
- ✓ 如果在访谈中，居民拒绝继续回答问题，你该怎么办？

- ✓ 居民说“我不明白这个问题是什么意思，你能给我解释一下吗？”，你该怎么办？

保持客观，不要试图向居民解释问题。如果居民没理解某个问题，社区大师应该更加清晰缓慢的把问题再重复一遍，给居民足够的时间来思考怎样回答这个问题。除非研究者给你们其他有关处理具体某个问题的指导，否则对待那些想要知道某个问题是什么意思的居民，你的回答应该是“你觉得这个问题是什么意思，就怎样回答。”除非经过研究者的同意，否则不要告诉居民任何一道问题的目的和意义。有些居民可能会询问问题中某个词的含义，这时社区大师不要作出任何解释，让居民自己去理解，并按照他们的理解来回答。

- ✓ 如果你刚提出了问题，居民就回答“我不知道”，你该怎么办？

不要轻易接受“我不知道”这样的回答，应该至少努力追问他们一下。虽然居民可能说“我不知道”，但这时他们可能并不是真的不知道怎样回答，而是还没想好怎样组织自己的语言来回答。如果遇到这样的问题，你可以追问他们说“那你觉得是怎样的呢？”“你觉得最可能是怎样的呢？”，通过这种方式来告诉居民，我们想要知道的是居民的想法，不需要百分之百精确的答案。

✓ 如果居民回答说“这个问题要看具体情况而定”，你该怎么办？

我们要避免接受有条件限制的回答。如果遇到这种情况，社区大师不要马上接受这样的回答，而应该继续追问。比如，你可以再重复一遍这个问题；或是在问题前面加上“在多数情况下”或“总体看来”这类词语；或是加上一些介绍性的句子，如“如果你必须作出选择，你更倾向于怎样”，然后再重复问题。如果你已经作了最大的努力，可居民还是坚持原来的回答，就记录下居民完整的回答是什么，还有你是怎样追问的。

✓ 如果在访谈中，居民拒绝继续回答问题，你该怎么办？

如果你无法说服居民使其继续接受访谈，你就应该记录下中止访谈的问题和访谈中止的具体原因。

### **2.求助性问题（包括诉苦、诉说自己的贫穷等）**

作为一名社区大使在访谈过程中我们经常会遇到居民向我们诉苦等情景，在种情形下，我们必须明白，虽然他们有可能说的是实情（很多也可能有夸大的成分），但是最重要的是我们必须明白我们自己的立场，我们在访谈过程中只是作为一名社区大使的身分，不能把自己的主观情绪加入到访谈过程中去。

✓ 如果遇到居民向你求助（多数是抚养人），讲述自己的经历时：

a.在当事人的情绪很激动时，设法帮助他平复心情。如：倾听他的诉说，在适当的时候说“我知道。”并点头表示自己的接纳；

b.表明自己的身份，让居民明白我们只是一名社区大使，并不能给他们提供直接的帮助，如告诉居民：“这一点我知道，也非常理解，我们尽力帮助你们，但是有时候我们也无能为力。”

c.给他提供可利用的资料，让他利用现有的社会支持。让他明白这样才是解决问题的有效的手段。

### **3.情绪失控（哭、悲伤）**

在访谈过程中，居民可能会因为多方面的原因（想起的往事等等），出现情绪失控，甚至对主试表达悲伤的情绪。此时，社区大师应该做的是：

a.首先不能慌乱，主试在前期要有情绪上的准备，要知道遇到这种情况的可能性；

b.若居民是出自内心感到悲伤，应该让他哭出来，不要试图劝阻他，对当事人表示理解。在当事人的情绪得到疏泄之后，给予适当的安慰，进行情绪疏导，鼓励当事人能积极地面对生活；

c.若居民的哭闹是为了更多的获得帮助（一开始就毫无缘由的表达悲伤、一面哭一面强调要你帮助他等等），我们应该先试图让其冷静，然后记录他需要什么帮助；

#### **4.愤怒、抱怨情绪的应对（对政府等机关地不满）**

由于当地人在经济上都存在一定的困难，并且由于种种原因很多地方的福利救济并不如预期的理想，很多当事人并没有享有自己应得的救济补助。在进行访谈的过程中也许居民会向我们表示抱怨的情绪（抱怨社会、抱怨政府）。遇到这种情况我们应该：

- a. 倾听，让居民宣泄自己的不满，鼓励访谈对象表达他对目前状况的感受；
- b. 接纳这种情绪，对这些负面情绪要给予充分的理解。
- c. 共情和支持，在当事人的情绪得到疏泄之后，设法协助他作出认知上的改变，让他明白未来的事情很多还是要他们自己去面对。
- d. 将居民的注意力调整到采取行动和解决问题上来。探索他们可以做什么样的事情来改变他们的生活，他们需要哪些方面的帮助，从哪里可以获得这些帮助。

#### **5.特殊问题**

在访谈过程中，可能会发生一些我们没有预期到的问题，例如，访谈者家里会出现一些突发事件（有人病倒、失火等等），这种情况可能会比较少遇到，当我们遇到时，首先要考虑到安全问题，要做到尽量保护自己以及居民，并寻求帮助。

#### **6.访谈儿童可能出现的情绪问题及处理（哀伤辅导指南）**

- ✓ 当儿童大声哭泣的时候：我们可以握着他/她的手，轻拍他/她的背部，或者在对方能够接受的情况下，拥抱他。
- ✓ 当儿童表示不愿意谈的时候：告诉他/她我们心里也很难受，我们想通过这项研究来帮助他/她以及和他/她有相同经历的孩子。
- ✓ 当儿童表示对于亲人的去世表示愤怒时：我们要给予充分的共情，理解他的愤怒，让他/她充分地表达愤怒、委屈和不满以及伤痛。引导他/她不将愤怒转向社会及周围的人，而是通过宣泄来化解悲愤。
- ✓ 当儿童表现出否认亲人去世的时候：帮助他/她确认亲人已经去世了。让他/她回忆亲人去世前后的情况，丧礼的过程。握着他/她的手，轻拍他/她的背，拥抱他/她。
- ✓ 当儿童表现出无助和绝望的时候：我们要帮助他意识到身边还有其他可利用的资源，比如机构能够提供他/她学习生活的机会，扩展家庭成员/抚养家庭成员依然关心他/她，有困难还可以寻求社会上的帮助，并且告诉他/她有哪些求助的方式。让他/她意识到，虽然亲人

不在了，但周围的人以及整个社会都关心他，而且随着他/她自己慢慢长大，生存能力不断在提高，在周围人及社会的支持下，通过自身的努力将能够过更好的生活。

- ✓ 当儿童表现出对访谈人员的愤怒时：我们可告诉对方，我们对他/她的状况感到很心疼，该研究是为了让社会更加重视艾滋孤儿的生存状况，为他们争取更多的社会援助，让他们的学习和生活更加健康快乐。
- ✓ 当儿童对社会充满敌意时：我们可告诉他/她对于他/她所遭受的不幸感到无比心疼。事情的发生让人很难接受，社会和政府部分确实是要负一定的责任。但是，现在政府部门开始给予极大的关注，会有越来越多的政策和措施来保护他们的健康成长。愤怒和敌意会让自己的心情不好，会影响身体健康；而且有时，可能因为愤怒和敌意而作出一些不妥的行为，伤害到自己和他人。
- ✓ 当儿童表现出对艾滋病的恐惧时：我们告诉他/她，是啊，艾滋病让他丧失了亲人，生活发生了非常不好的变化，给他带来了很多的伤痛。艾滋病确实可怕，但是你是安全的，健康的，艾滋病的传播途径很有限，艾滋病是可以预防的，你以后的生活中，只要懂得预防，就不会得病，就能够过一个健康正常的生活。
- ✓ 当儿童表现出孤独时：我们可鼓励他/她和扩展家庭成员，抚养家庭成员，以及好朋友，表达他的难过。多和他人一起做事情，尤其是同学朋友等，一起学习，一起干活，一起聊天等等。另外还可以将自己的感受写下来，也可以给逝去的父母写信，表达自己对他们的想念，向他们保证自己要好好的生活。
- ✓ 当儿童表现出报复的倾向时：首先表示对他/她的境遇感到心疼。一时冲动有报复的想法是可以理解的，但是一定不可以真的那么做。因为一旦那样做了，自己就会违反社会法律，也会像他们那些做错事的人，受到社会的惩罚。报复是违法的，不可以那么做。”

## 四、讨论家访提纲

- ▶ 访谈提纲(见附件 1.1)是否合理？
- ▶ 访谈提纲是否表达了我們想问的内容？
- ▶ 您是否有修改意见？

## 五、角色扮演

案例：一项研究中，研究者需要在居民的家中进行访谈，在交谈的过程中，谈过逝去的亲人，居民的情绪失控，失声痛哭。访谈人员不知所措，打算离开，下次接着访谈。

问题：

- 1 此时，访谈人员的做法您是否认同？
- 2 在我们的访谈中，您认为是否会遇到类似的问题？
- 3 您认为访谈人员应该怎么办？

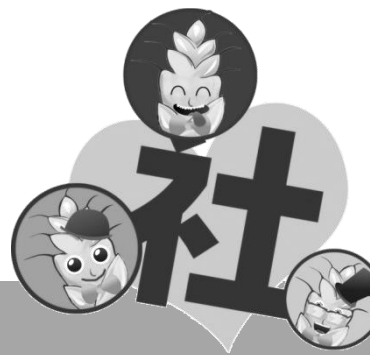



## 附件 1.1 家访提纲（抚养者）

亲爱的家长，我很希望了解您的家庭情况，在此基础上为您提供帮助。我会问您一些问题，请如实进行回答。谢谢您！

可以采用下面的提纲进行访谈：

| 问题：                        | 目的     |
|----------------------------|--------|
| 唠家常，介绍自己的来意                |        |
| 1. 家里生活怎么样？有什么困难吗？         | 家庭生活情况 |
| 2. 街坊四邻相处的怎么样？有困难会互相帮助吗？   |        |
| 3. 您怎么看待您从其他人或社区那里得到帮助？    |        |
| 4. 希望从村里或街坊四邻得到什么样的帮助？     |        |
| 5. 您认为我可以为您家做些什么？          |        |
| 6. 您和孩子相处的怎么样？             | 孩子抚养情况 |
| 7. 请说一下孩子的情况？              |        |
| 8. 孩子是否在上学                 |        |
| 9. 孩子喜欢上学吗？                |        |
| 10. 孩子在学校里有什么困难？           |        |
| 11. 您的孩子有不高兴和难过的时候吗？会告诉您吗？ |        |
| 12. 您会与孩子聊他学校的事情吗？         |        |
| 13. 您知道孩子有那些好朋友吗？          |        |
| 14. 您了解孩子的脾气吗？             |        |
| 15. 您会辅导孩子的作业吗？            |        |
| 16. 您希望村里可以举行一些什么活动来帮助您？   |        |
| 你认为有哪些问题可以补充：              |        |
|                            |        |
|                            |        |
|                            |        |
|                            |        |
|                            |        |

## 附件 1.2 家访提纲（孩子）

亲爱的家长，我很希望了解您的家庭情况，在此基础上为您提供帮助。我会问您一些问题，请如实进行回答。谢谢您！

| 问题：                            | 目的     |
|--------------------------------|--------|
| 唠家常，介绍自己的来意                    |        |
| 1. 你今年有多大？还在上学吗？几年级了？喜欢上学吗？    | 孩子学校情况 |
| 2. 你在学校有什么困难吗？跟同学相处如何？跟老师相处如何？ |        |
| 3. 你平常做些什么事呢？做家务吗？做什么家务？       | 孩子家庭情况 |
| 4. 你喜欢现在的生活吗？有什么不满意的地方吗？       |        |
| 5. 你家里生活怎么样？有什么困难吗？            |        |
| 6. 你有零花钱吗？每个月大概多？过年有没有压岁钱？     |        |
| 7. 你和你的（主要抚养者的角色，如大伯）关系怎么样？    |        |
| 8. 你和家里其他人关系怎么样？               |        |
| 9. 你有哪些好朋友？平时和谁最好？             | 孩子社会环境 |
| 10. 有没有人欺负过你？因为什么原因欺负你？        |        |
| 11. 你得到过别人的哪些帮助吗？              |        |
| 12. 能给我说说你最近最不开心的事吗？最开心的事呢？    |        |
| 你认为有哪些问题可以补充：                  |        |
|                                |        |
|                                |        |
|                                |        |
|                                |        |
|                                |        |

## 附件 1.3 家访痕迹表（每一次家访后由社区大使记录）

|              |                                           |
|--------------|-------------------------------------------|
| 家庭编码：        |                                           |
| 家访时间：记录人：    |                                           |
| 被访者：         | 地点：                                       |
| 家庭组成成员都有谁？   |                                           |
| 家庭类型：        | 1.单孤（父） 2.单孤（母） 3.双孤 4.单患（父） 5.单患（母） 6.双患 |
| 抚养人是孩子的：     |                                           |
| 孩子生活状况       |                                           |
| 孩子学习状况       |                                           |
| 孩子心理状况       |                                           |
| 抚养者与孩子关系如何   |                                           |
| 社区大使给出的建议    |                                           |
| 家庭遇到的困难：     |                                           |
| 家庭提出的要求：     |                                           |
| 社区大使给出的解决方案： |                                           |

## 附件 1.4 家访反馈表（每半年请家长填写一次）

亲爱的家长，经过家访之后，您觉得怎么样？我很希望了解您的看法，请根据您的观察和感受，对下面的每一道题目从不符合到符合进行打分（满分是5分），或写下你个人的看法。这些内容只有研究者可以看到，所以请把您的真实想法告诉我们。谢谢您！

学校/村庄：孩子的编码：孩子性别：孩子年级：.

您对社区大使工作的满意程度是？

1.非常不满意      2.不满意      3.一般      4.满意      5.非常满意

|                   | 完全不符合 | 不符合 | 不清楚 | 符合 | 完全符合 |
|-------------------|-------|-----|-----|----|------|
| 1 社区大使来访让您觉得轻松愉快  |       |     |     |    |      |
| 2 家访的内容是有针对性的     |       |     |     |    |      |
| 3 家访确实能让您说出实际的问题  |       |     |     |    |      |
| 4 我很感谢社区大使的家访     |       |     |     |    |      |
| 5 社区大使帮助解决了您遇到的问题 |       |     |     |    |      |

您对社区大使工作有哪些建议吗？

## 附件 1.5 有用资源

### 河南的组织

|                                                                |                                                                                                                 |
|----------------------------------------------------------------|-----------------------------------------------------------------------------------------------------------------|
| <p>河南省上蔡县文楼村红丝带协会<br/>地址：河南省上蔡县文楼村红丝带协会<br/>电话：13939694368</p> | <p>河南金色阳光儿童互助（关怀）协会<br/>地址：450015 河南郑州市陇海中路 64 号科技楼 515 室<br/>咨询电话：0371-67956079<br/>邮箱：chengysun@gmail.com</p> |
|----------------------------------------------------------------|-----------------------------------------------------------------------------------------------------------------|

### 国际非政府组织：

|                                                                                                                                                       |                                                                                                                                                     |
|-------------------------------------------------------------------------------------------------------------------------------------------------------|-----------------------------------------------------------------------------------------------------------------------------------------------------|
| <p>半边天基金会<br/>地址：北京市朝阳区建国门外外交公寓 4-2-142<br/>电话：+86(10) 8532-3042<br/>传真：+86(10) 8532-1920</p>                                                         | <p>香港乐施会<br/>北京朝阳区朝外北街吉庆里小区十号楼<br/>蓝筹名座 E 座 2 区 802 室（邮编：100020）<br/>电话(86)10 65512635 65512636<br/>传真:(86)10 65511521<br/>电子邮件：bj@oxfam.org.hk</p> |
| <p>香港智行基金会（上蔡）<br/>地址：北京市东城区东中街 58 号，美惠大厦 4 单元 1202 房间<br/>邮编：100027<br/>电话：(86) 010-58208574<br/>传真：(86) 010-65542199<br/>电邮：beijing@chiheng.org</p> |                                                                                                                                                     |

### 中国非政府组织：

|                                                                                                                                                |                                                                                                           |
|------------------------------------------------------------------------------------------------------------------------------------------------|-----------------------------------------------------------------------------------------------------------|
| <p>红十字会<br/>地址：北京市东城区北新桥三条 8 号<br/>咨询电话：：(8610) 84025890</p>                                                                                   | <p>北京关爱下一代青少年中心<br/>地址：北京昌平白浮泉路 21 号 102200<br/>电话：(86-10) 80111158<br/>邮箱：careyouth2005@yahoo.com.cn</p> |
| <p>中华慈善总会——提供社会救助<br/>地址：北京市西城区二龙路甲 33 号新龙大厦<br/>咨询电话：：(010)66083260</p>                                                                       | <p>中国青少年发展基金会<br/>地址：北京市东城区后圆恩寺胡同甲 1 号<br/>咨询电话：3890-0110-3896310738</p>                                  |
| <p>北京爱知行研究所<br/>地址：北京海淀区阜成路 42 号中裕商务花园 12B -2 层( 100036)<br/>电话：（86-10）88114625<br/>邮箱：<br/>aizhixing@aizhi.org<br/>aizhi.policy@gmail.com</p> |                                                                                                           |

### 中国疾病预防控制中心及其附属组织

|                                                                                                     |                                                                                          |
|-----------------------------------------------------------------------------------------------------|------------------------------------------------------------------------------------------|
| <p>中国性病艾滋病防治协会——防治艾滋病<br/>地址：北京市宣武区南纬路 27 号<br/>咨询电话：010-63034521<br/>邮箱：luomei999@yahoo.com.cn</p> | <p>中国疾病预防控制中心——技术支持，公共卫生服务管理<br/>地址：北京市宣武区南纬路 27 号<br/>咨询电话：（86-10）63186655/83159206</p> |
|-----------------------------------------------------------------------------------------------------|------------------------------------------------------------------------------------------|

### 联合国机构

|                                                                                                                     |                                                                                          |
|---------------------------------------------------------------------------------------------------------------------|------------------------------------------------------------------------------------------|
| <p>联合国教科文组织<br/>地址：北京建国门外外交公寓 5 号楼 1503 房<br/>咨询电话：(86-10)65325883 / 2449<br/>邮箱：beijing@unesco.org</p>             | <p>联合国儿童基金会<br/>地址：北京朝阳区三里屯路 12 号<br/>咨询电话：（86-10）65323131<br/>邮箱：klegins@unicef.org</p> |
| <p>世界卫生组织<br/>地址：Avenue Appia 20, 1211 Geneva 27,<br/>Switzerland<br/>咨询电话：+ 41227912111</p>                        | <p>国际劳工组织<br/>地址：北京塔园外交人员办公楼 1—10—1<br/>咨询电话：65325091</p>                                |
| <p>联合国艾滋病规划署<br/>地址：北京东外大街亮马河南路 14 号.塔园外交办公大楼 1-16-2 号<br/>咨询电话：(8610) 8532 2226<br/>邮箱：unaids@public.un.org.cn</p> |                                                                                          |

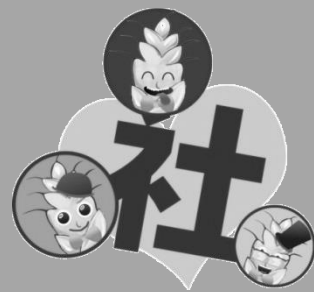

## 工作内容之二：社区活动

### 一、社区活动的目的

社区大使工作面对的是整个社区的受访者，以社区居民为核心，激励和支持其共同努力改善自己社区生活的条件，鼓励居民互助、自主和解决，提升居民的各种能力，满足社区居民需要，缓解差距，解决社区问题，培养居民对社区的归属感和认同感。更致力于增加居民信心、技术和社区自助组织的权利，促进资源整合，改善社区环境，使社区保持健康的状态和良性发展，实现社会公正。

儿童是国家的未来，亲子之间的交流对于孩子的发展至关重要。由于大部分父母忙于工作，无暇照顾子女，同时子女自我适应性和约束性相对较差，使得很多孩子出现了诸多问题，如学习成绩差，厌学、喜欢打架闹事，这些不良行为已经开始侵蚀孩子的成长，各种现实问题也日益凸显出来，并逐渐开始影响到他们的学习生活和成长环境。很多家长很顾及“面子”，认为不好意思向孩子表达自己的感情；同时会觉得父母的主要任务是为孩子提供足够富足的物质生活条件，很少关心孩子的心理变化和感情需要。不少家长错误的认为教育孩子是学校的事情，孩子出现问题是学校、老师的责任。举行社区活动协助家长了解各年龄阶段孩子的心理特征及需求，指导家庭提升照顾与教育子女的技巧，开展多样特征及需求，指导家庭提升照顾与教育子女的技巧，开展多样社区亲子活动，建立和谐亲子关系。

### 二、社区活动的形式

**对于老年人：**定期开展各种类型的活动，包括各类节日性庆祝活动，如端午节、重阳节、中秋节、冬至等，以及常性的活动，如季度生日会、外展康复活动等；以及开展各类兴趣班，协助老人发挥潜能，颐养天年。

**对于青少年：**通过组织青少年参与各种活动，促进其健康成长和自由发展，帮助他们与社会达成一种良好的适应状态，如：组织郊游，做游戏等。

### 三、社区活动：我的计划书

|          |       |
|----------|-------|
| 活动主题：    | 活动形式： |
| 活动目的：    |       |
| 活动期待的效果： |       |
| 需要哪些准备：  |       |



## 附件 2.1 可选的社区活动表

1. 社区运动会
2. 新春茶话会
3. 百家宴
4. 亲子教育活动
5. 春游
6. 整理垃圾
7. 烹饪比赛
8. 跳绳比赛
9. 参观古迹

根据您的经验，您觉的还可以举办什么样的社区活动？

- 10.
- 11.
- 12.
- 13.
- 14.
- 15.

## 附件 2.2 参考案例

### 案例 1：“我的宝贝，生日快乐！”

前期准备工作：

- 1 准备好场地；（如：教室，村委会等）
- 2 准备好活动内容；（如：画画，玩游戏等）
- 3 确定参与的人数；（如：10 户人家）；确定组织者，（如：村委员等）；
- 4 确定活动的时间，开始的时间和结束的时间。

具体活动如下：

社会工作者在活动中心开展了幸福活动周之幸福手拉手——“我的宝贝、生日快乐”活动，活动历经两个小时圆满结束。

组织者和志愿者提前简单的布置了场地。提前购买了画画的纸和笔。

早上 9 点，大家聚集在活动中心。为了让小朋友过一个有意义的生日，社会工作者策划了大家一起动手——一起画出幸福时刻之绘画这个主题，大家可以按照自己心中所想的幸福时刻，自由创作，给家长和孩子创造共同合作与动手的机会，促进亲子之间的交流与沟通。

活动现场，小朋友们认真的画画，家长在一旁或观看孩子，或动手帮孩子涂上几笔，看到孩子完成后的作品，脸上都露出了欣喜的笑容。志愿者也是忙的不可开交，活动现场飘荡着“姐姐，帮我修改一下”或者“姐姐，帮我调个土黄色”的高呼声，现场的氛围非常活跃。

最后，当五颜六色的成品画好后，孩子们都兴奋的举起来给大家看，大家评选了最好看的几幅画，并且拍照留念。

在祝你生日快乐的歌曲中，活动也走向了尾声，落下帷幕。

## 附件 2.3 社区活动痕迹表

|           |     |
|-----------|-----|
| 活动主题：记录人： |     |
| 时间：       | 地点： |
| 参与人数：     |     |
| 活动内容及程序：  |     |
| 活动效果：     |     |
| 备注：       |     |

## 附件 2.4 社区活动反馈表

亲爱的家长，参加活动之后，您觉得怎么样？我很希望了解你对这些活动的看法，请根据你的观察和感受，对下面的每一道题目从不符合到符合进行打分（满分是5分），或写下你个人的看法。这些内容只有研究者可以看到，所以请把您的真实想法告诉我们。谢谢您！

学校/村庄： 孩子的编码： 孩子性别： 孩子年级： .

您对社区大使工作的满意程度是？

1.非常不满意      2.不满意      3.一般      4.满意      5.非常满意

| 问题                  | 完全不符合 | 不符合 | 不清楚 | 符合 | 完全符合 |
|---------------------|-------|-----|-----|----|------|
| 活动的内容很丰富，我认识了很多的人   | 1     | 2   | 3   | 4  | 5    |
| 活动的组织者和参与者负责        | 1     | 2   | 3   | 4  | 5    |
| 我有充足的时间来参加活动        | 1     | 2   | 3   | 4  | 5    |
| 活动选的场地好             | 1     | 2   | 3   | 4  | 5    |
| 活动中的互动拉近了我与孩子的距离    | 1     | 2   | 3   | 4  | 5    |
| 我在活动中学到了很多教育孩子的知识   | 1     | 2   | 3   | 4  | 5    |
| 活动之后，我觉得应该多与孩子交流    | 1     | 2   | 3   | 4  | 5    |
| 通过与其他家长交流，我明白了存在的问题 | 1     | 2   | 3   | 4  | 5    |
| 活动中，我对于我的孩子有了更多的了解  | 1     | 2   | 3   | 4  | 5    |
| 我能够和他人分享我的喜怒哀乐      | 1     | 2   | 3   | 4  | 5    |
| 我的朋友都在试着帮我          | 1     | 2   | 3   | 4  | 5    |
| 当事情变糟时，我可以指望我的朋友    | 1     | 2   | 3   | 4  | 5    |
| 我有能够与其分享喜怒哀乐的朋友     | 1     | 2   | 3   | 4  | 5    |
| 我可以与朋友讨论我的问题        | 1     | 2   | 3   | 4  | 5    |

## 工作内容之三：社区讲座

### 一、社区讲座

#### 1.什么是讲座

讲座是一种快捷地向人们传达思想的方法，通过讲座的形式，可以让大家很快的了解到想得到的信息，让大家得到相应的帮助。

#### 2.讲座的目的

- ✓ 受艾滋影响儿童及家庭的权利保障
- ✓ 艾滋病知识普及
- ✓ 减少歧视

### 二、讲座的主题

- 1、 艾滋病知识
  - 2、 艾滋病关爱的国家与地方政策
  - 3、 亲子关系
  - 4、 怎样对待爱玩的孩子
  - 5、 怎么处理与孩子的矛盾
  - 6、 如何倾听孩子的声音
  - 7、 处理孩子之间的冲突
  - 8、 怎么辅导孩子学习
  - 9、 如何走进他们的心理
  - 10、 怎样增加家庭的幸福
- 根据您的经验，您觉的还可以举办什么样的社区活动？
- 11、
  - 12、
  - 13、
  - 14、
  - 15、

### 三、讲座注意事项

讲座的场所：教室或者村委会，或者其他适宜的场所；

讲座的规模：人数为 20-40 人左右为宜；

讲座时间：需要根据大家都空闲的时间来安排，最好不要安排在农忙季节。讲座的主题选择要根据来听讲座的听众的特点，如：希望老人来参与，可以多安排关于如何更好的度过晚年，或者照料自己的身体方面的内容；如果家长和孩子参与，可以讲解亲子交流方面的话题。

讲座时长：一般为 1 个小时。

### 三、社区讲座：我的计划书

|          |       |
|----------|-------|
| 活动主题：    | 活动形式： |
| 活动目的：    |       |
| 活动期待的效果： |       |
| 需要哪些准备：  |       |

## 附件 3 .1:讲座痕迹表

|           |     |
|-----------|-----|
| 讲座主题：记录人： |     |
| 时间：       | 地点： |
| 参与人数：     |     |
| 讲座主要内容：   |     |
| 效果：       |     |
| 备注：       |     |

## 附件 3.2 讲座反馈表

亲爱的家长，参加讲座之后，您觉得怎么样？我很希望了解您对这些活动的看法，请根据您的观察和感受，对下面的每一道题目从不符合到符合进行打分（满分是5分），或写下您个人的看法。这些内容只有研究者可以看到，所以请把您的真实想法告诉我们。谢谢您！

学校/村庄： 孩子的编码： 孩子性别： 孩子年级： .

您对社区大使工作的满意程度是？

1.非常不满意          2.不满意          3.一般          4.满意    5.非常满意

| 问题                | 完全不符合 | 不符合 | 不清楚 | 符合 | 完全符合 |
|-------------------|-------|-----|-----|----|------|
| 讲座的内容很丰富，我认识了很多的人 | 1     | 2   | 3   | 4  | 5    |
| 讲座的组织者和参与者负责      | 1     | 2   | 3   | 4  | 5    |
| 我有充足的时间来参加活动      | 1     | 2   | 3   | 4  | 5    |
| 讲座的主题我很感兴趣        | 1     | 2   | 3   | 4  | 5    |
| 我在讲座中学到了很多知识      | 1     | 2   | 3   | 4  | 5    |
| 我可以与老师们分享我的快乐和痛苦  | 1     | 2   | 3   | 4  | 5    |
| 我可以和老师们讨论我遇到的困难   | 1     | 2   | 3   | 4  | 5    |
| 我的老师们在努力帮我        | 1     | 2   | 3   | 4  | 5    |



## 附件 3.3 培训反馈表

我很希望了解您通过培训之后的效果，请根据您的观察和感受，评价一下通过活动之后您在以下方面有进步，对下面的每一道题目从不符合到符合进行打分（满分是 5 分），谢谢您！

您进步了吗？

| 问题                 | 完全不符合 | 不符合 | 不清楚 | 符合 | 完全符合 |
|--------------------|-------|-----|-----|----|------|
| 对社区大使的任务十分清楚       | 1     | 2   | 3   | 4  | 5    |
| 明确社区大使的服务对象        | 1     | 2   | 3   | 4  | 5    |
| 对于社区大使的工作内容不是很清楚   | 1     | 2   | 3   | 4  | 5    |
| 明确做访谈工作的步骤         | 1     | 2   | 3   | 4  | 5    |
| 可以自己写出简单的访谈提纲      | 1     | 2   | 3   | 4  | 5    |
| 在家访的角色扮演中可以很好的提出问题 | 1     | 2   | 3   | 4  | 5    |
| 可以简单写出社区活动的活动步骤    | 1     | 2   | 3   | 4  | 5    |
| 明确可实施的社区活动的类型      | 1     | 2   | 3   | 4  | 5    |
| 社区活动所需的场所、规模可以实现   | 1     | 2   | 3   | 4  | 5    |
| 社区讲座的场地、人数、主题心中有数  | 1     | 2   | 3   | 4  | 5    |
| 社区讲座的举行有点困难        | 1     | 2   | 3   | 4  | 5    |

## 参考文献

- American Psychological Association (1981). APA (American Psychological Association) Ethical Guidelines for Research with Human Subjects
- Li, X., Barnett, D., Fang, X., Lin, X., Zhao, G., Zhao, J., ... & Stanton, B. (2009). Lifetime incidences of traumatic events and mental health among children affected by HIV/AIDS in rural China. *Journal of Clinical Child & Adolescent Psychology*, 38(5), 731-744.
- National Commission for the Protection of Human Subjects of Biomedical Behavioral Research. (1978). *The Belmont report: Ethical principles and guidelines for the protection of human subjects of research*. Bethesda, MD.: ERIC Clearinghouse.
- West, A., & Wedgwood, K. (2006). Children affected by AIDS, orphans and impact mitigation in China. In J. Kaufman, A. Kleinman & T. Saich (Eds.), *AIDS and social policy in China*. (pp. 243-264). Cambridge, MA: Harvard University Asia Center.
- Wu, Z., Liu, Z., & Detels, R. (1995). HIV-1 infection in commercial plasma donors in China. *Lancet*, 346(8966), 61-62.
- Wu, Z., Sullivan, S. G., Wang, Y., Rotheram-Borus, M. J., & Detels, R. (2007). Evolution of China's response to HIV/AIDS. *The Lancet*, 369(9562), 679-690. doi: 10.1016/S0140-6736(07)60315-8
- Zhao, G., Li, X., Fang, X., Zhao, J., Yang, H., & Stanton, B. (2007). Care arrangements, grief and psychological problems among children orphaned by AIDS in China. *Aids Care-Psychological and Socio-Medical Aspects of Aids/Hiv*, 19(9), 1075-1082. doi: 10.1080/09540120701335220
- 河南省人民政府---关于进一步加强艾滋病防治工作的意见.  
<http://www.henan.gov.cn/zwgk/system/2011/07/20/010259035.shtml>, 2013-07-25.
- 国务院办公厅关于印发中国遏制与防治 艾滋病“十二五”行动计划的通知.  
[http://www.gov.cn/zwgk/2012-02/29/content\\_2079097.htm](http://www.gov.cn/zwgk/2012-02/29/content_2079097.htm), 2013-07-25.
- 社会工作者上门服务的艺术. [http://lbg.gov.cn/News\\_view.asp?Newsid=496](http://lbg.gov.cn/News_view.asp?Newsid=496), 2013-07-25.
- 世界卫生组织简报. WHO PRESS. 2012 年第 16 期.
- 新华网. 六省区未落实对艾滋病病人"四免一关怀"配套政策.  
[http://news.xinhuanet.com/health/2005-11/30/content\\_3858969.htm](http://news.xinhuanet.com/health/2005-11/30/content_3858969.htm), 2013-07-25.
- 中国疾病预防控制中心. 2011 年中国艾滋病疫情估计.  
<http://www.chinaids.org.cn/n16/n1193/n4073/745902.html>. 2011-01-29.

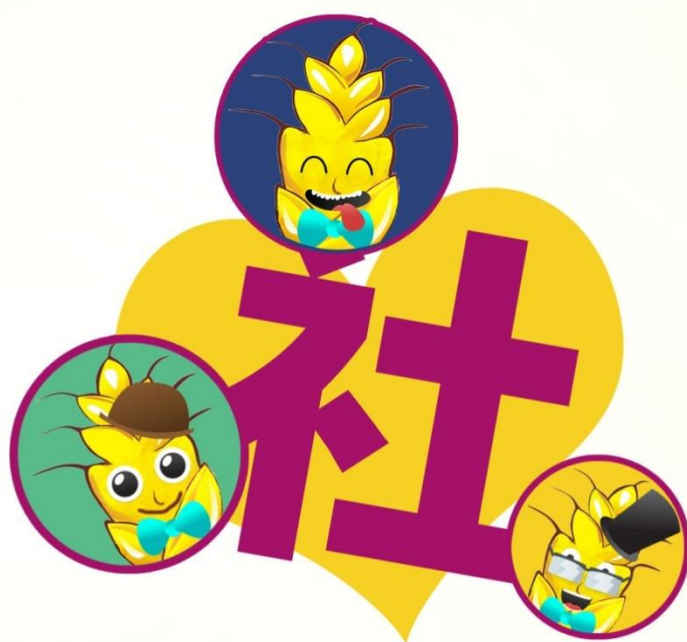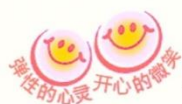

河南大学中美国际合作研究课题制作
